# Supplementary material for: Dynamic carbon flux network of a diverse marine microbial community
Source: PubMed Central journal article supplement (PMC9723560; doi:10.1038/s43705-021-00055-7), 2021-09-25
Supplement: 43705_2021_55_MOESM2_ESM.pdf [file 43705_2021_55_MOESM2_ESM.pdf]

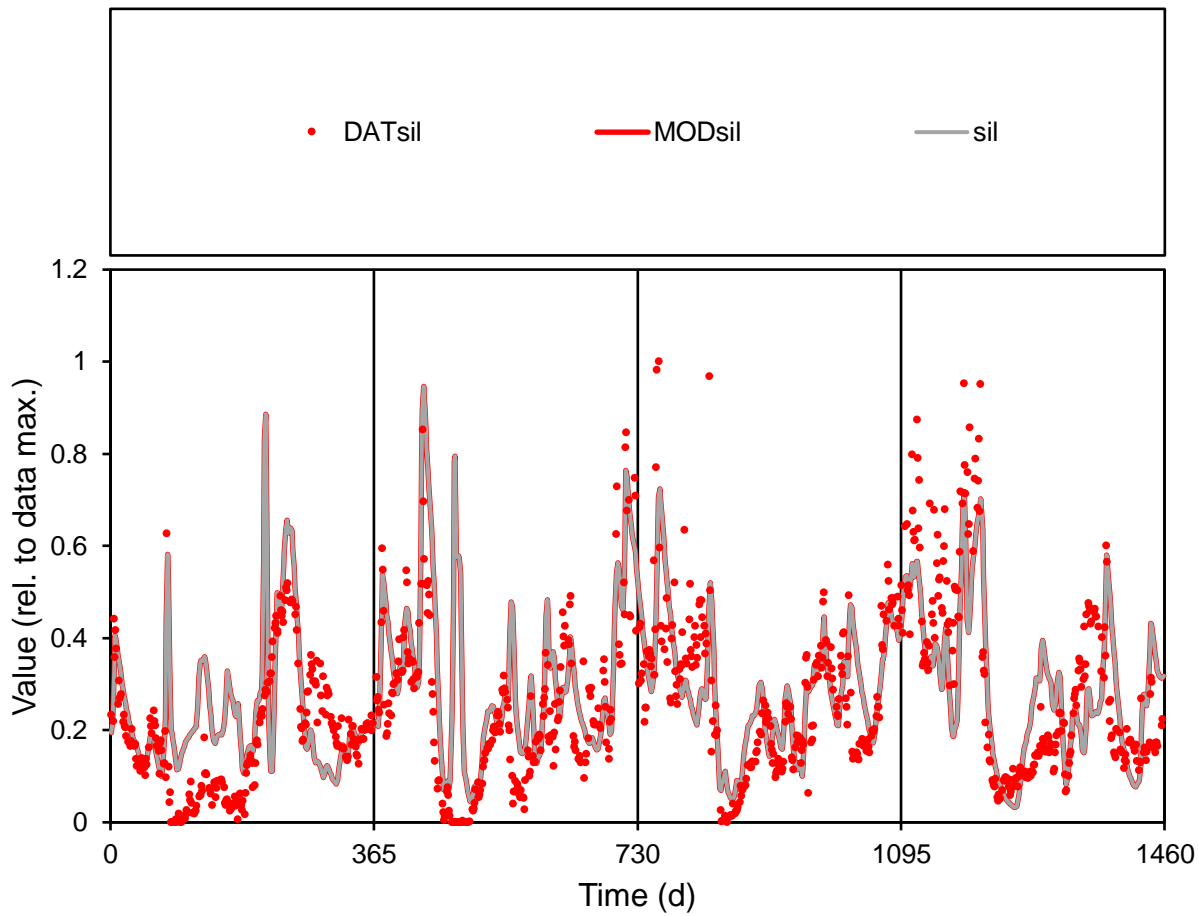

**Figure S1(1). Model - data comparison for observation: sil**

Normalized to max. value of data. Symbols are observations and lines are model. Red line corresponds to observations (e.g. Chlorophyll *a*), others are sub-components (e.g. individual phytoplankton species). See Tables S19 and S24 for observation and model component IDs, and mapping.

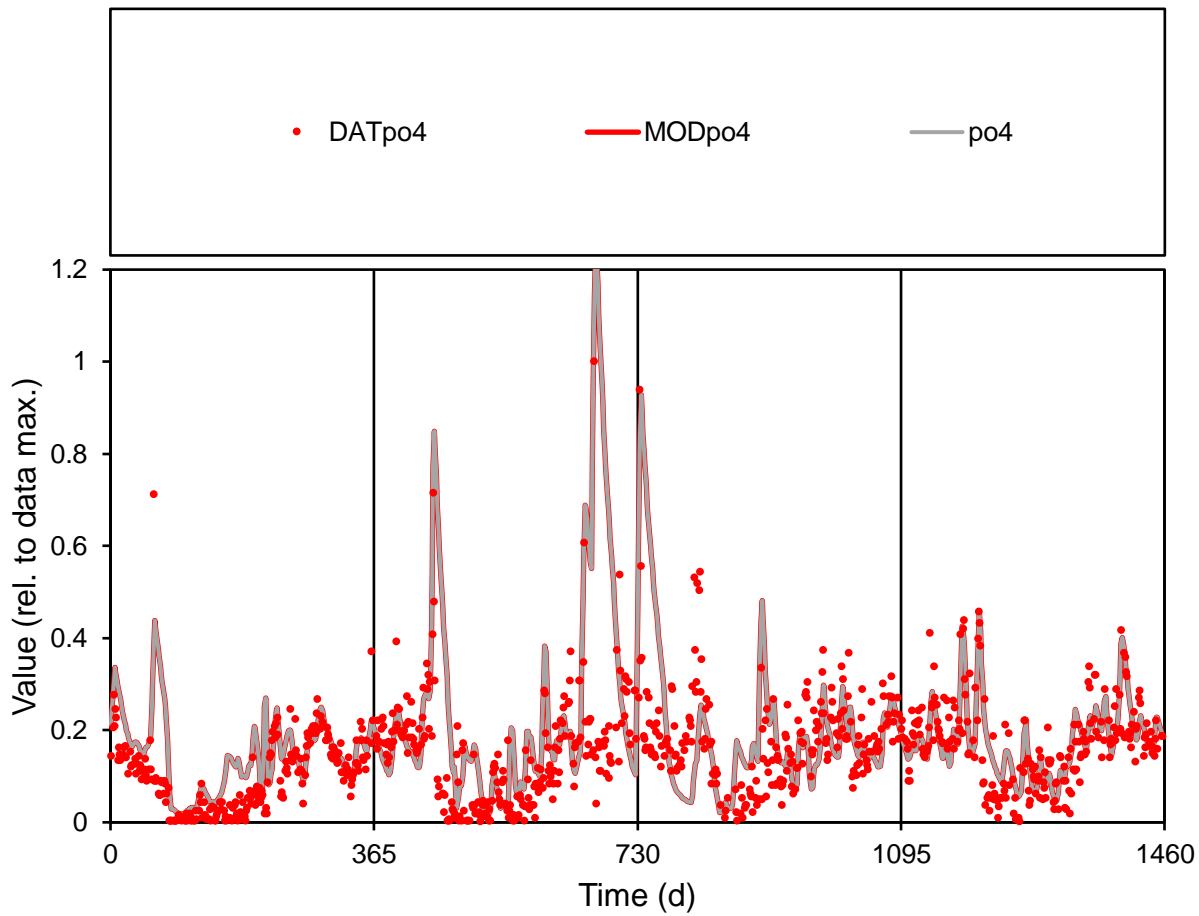

**Figure S1(2). Model - data comparison for observation: po4**

Normalized to max. value of data. Symbols are observations and lines are model. Red line corresponds to observations (e.g. Chlorophyll *a*), others are sub-components (e.g. individual phytoplankton species). See Tables S19 and S24 for observation and model component IDs, and mapping.

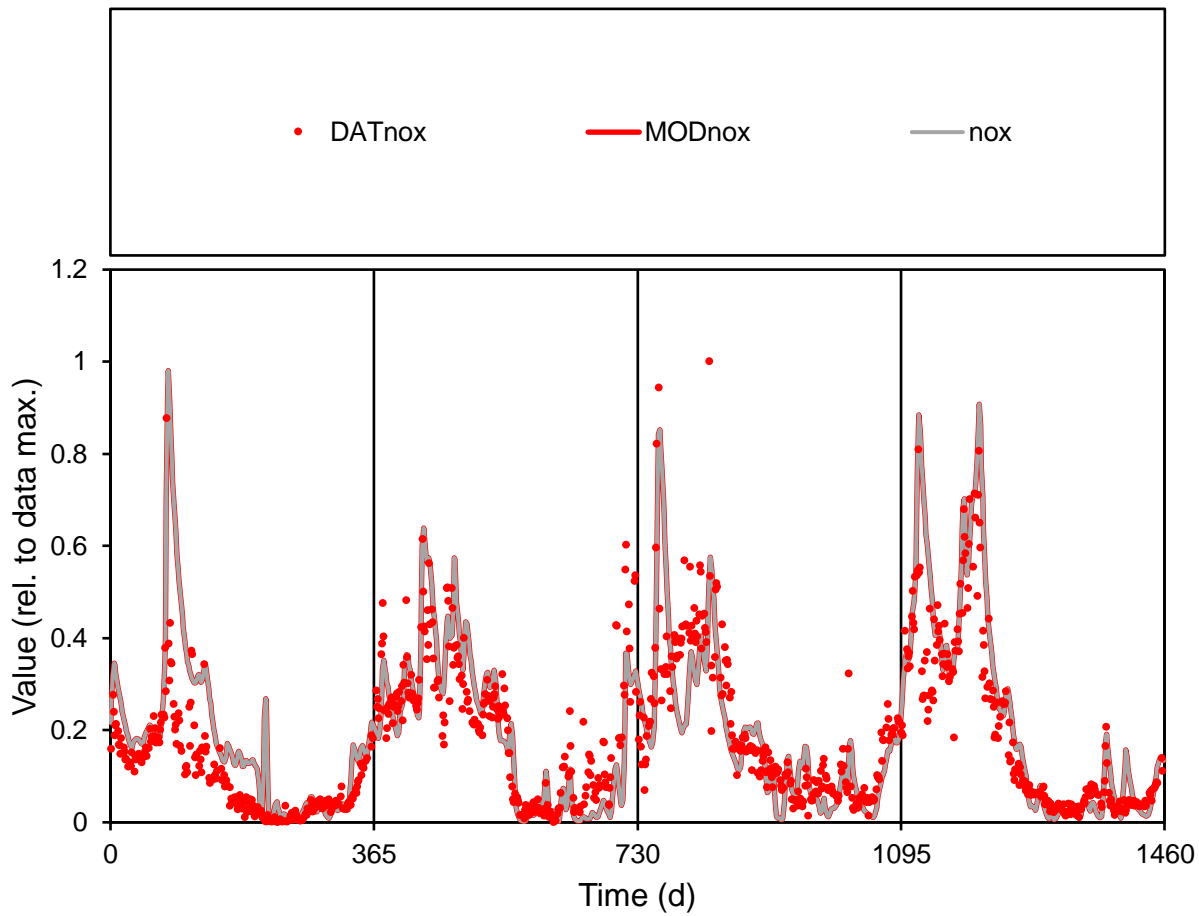

**Figure S1(3). Model - data comparison for observation: nox**

Normalized to max. value of data. Symbols are observations and lines are model. Red line corresponds to observations (e.g. Chlorophyll *a*), others are sub-components (e.g. individual phytoplankton species). See Tables S19 and S24 for observation and model component IDs, and mapping.

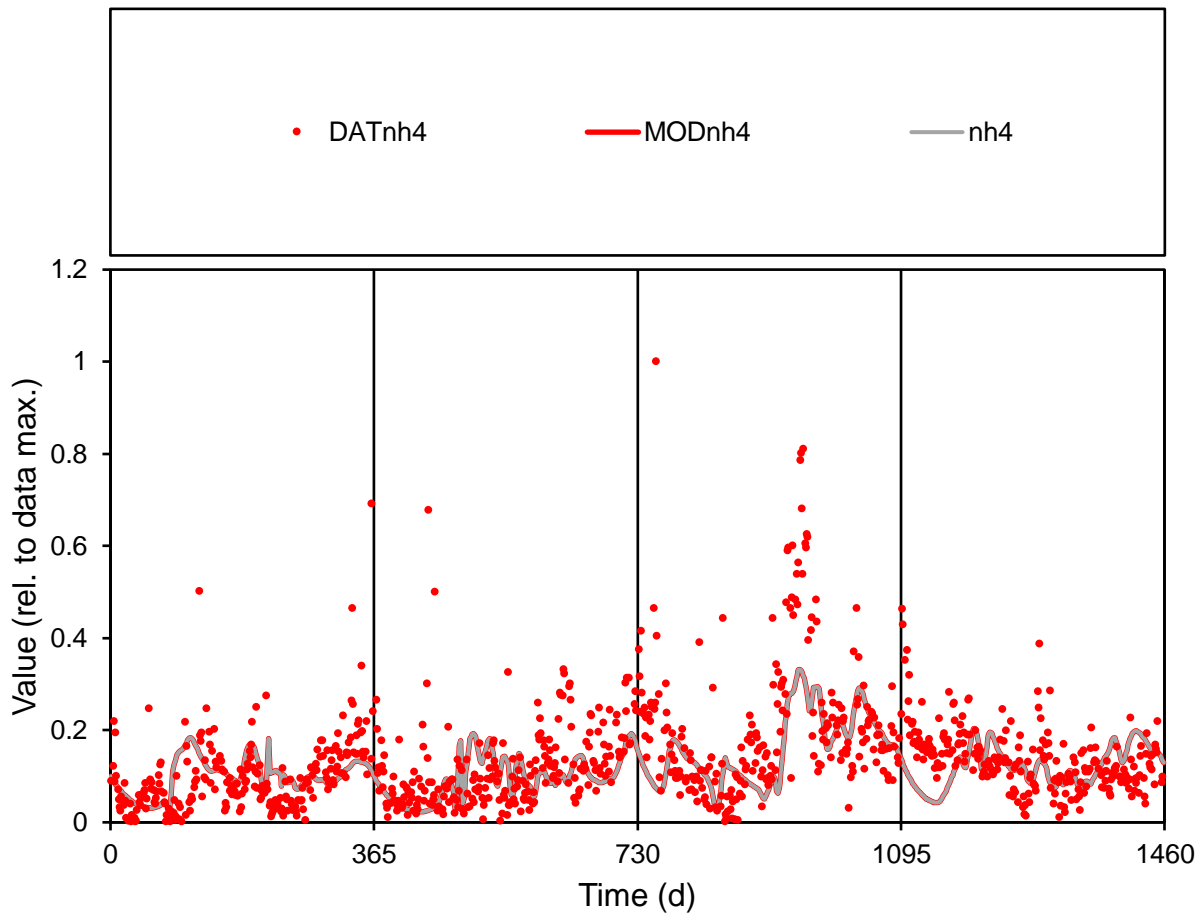

**Figure S1(4). Model - data comparison for observation: nh4**

Normalized to max. value of data. Symbols are observations and lines are model. Red line corresponds to observations (e.g. Chlorophyll *a*), others are sub-components (e.g. individual phytoplankton species). See Tables S19 and S24 for observation and model component IDs, and mapping.

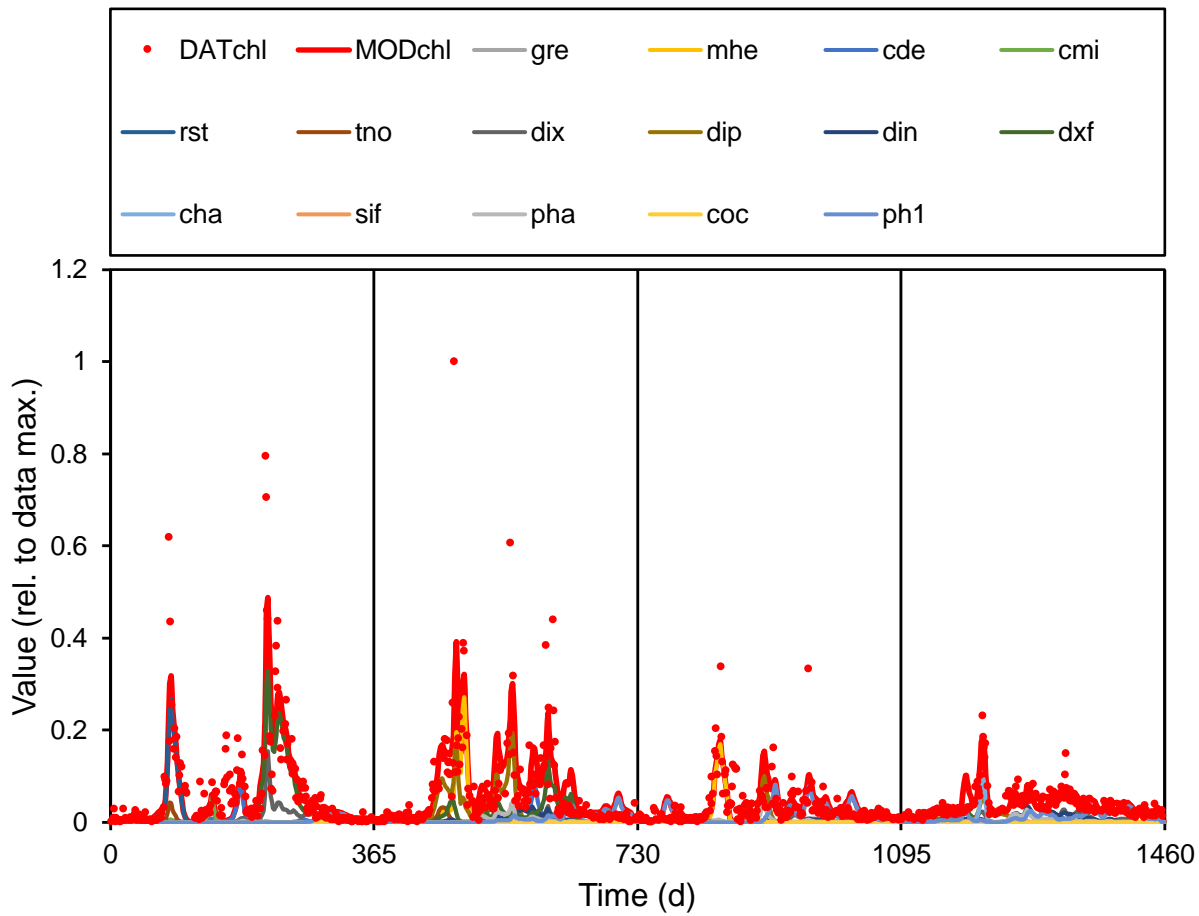

**Figure S1(5). Model - data comparison for observation: chl**

Normalized to max. value of data. Symbols are observations and lines are model. Red line corresponds to observations (e.g. Chlorophyll *a*), others are sub-components (e.g. individual phytoplankton species). See Tables S19 and S24 for observation and model component IDs, and mapping.

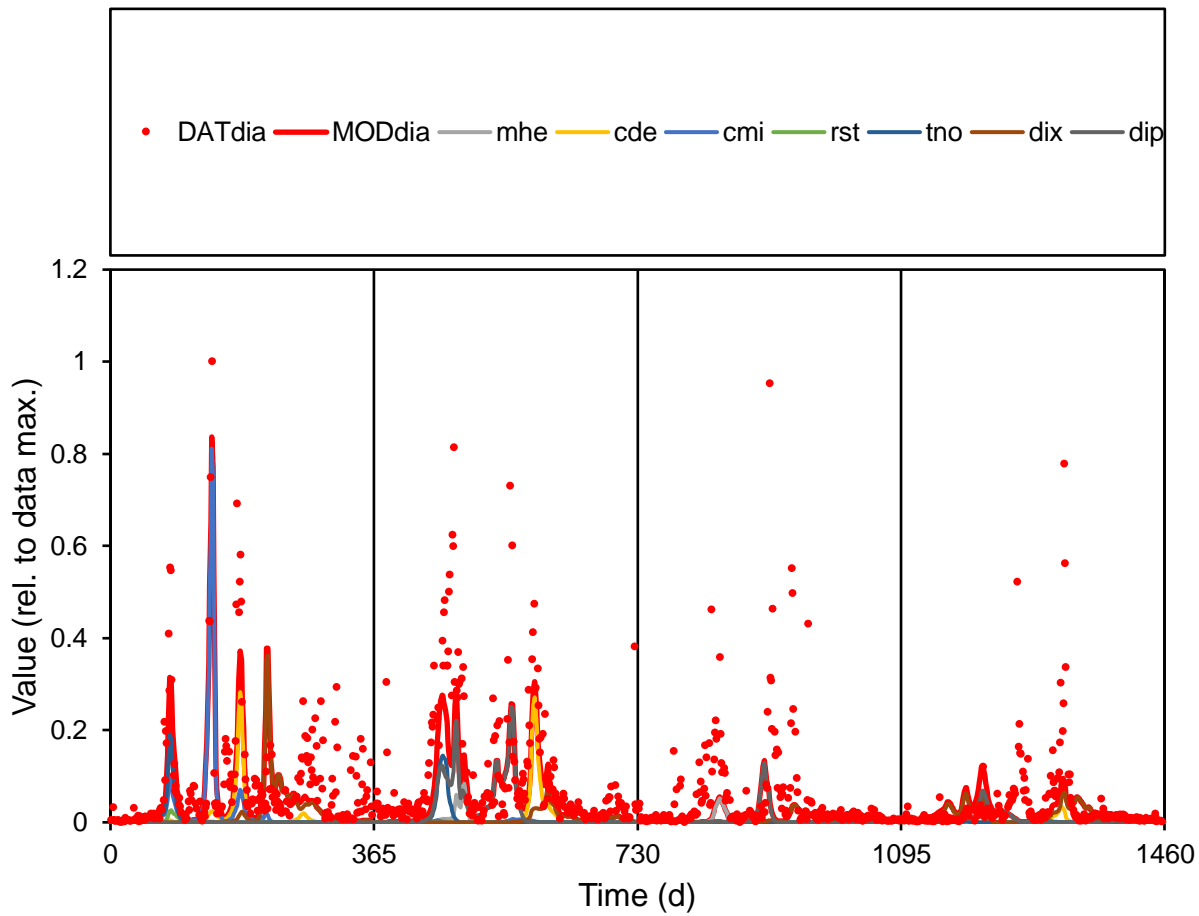

**Figure S1(6). Model - data comparison for observation: dia**

Normalized to max. value of data. Symbols are observations and lines are model. Red line corresponds to observations (e.g. Chlorophyll *a*), others are sub-components (e.g. individual phytoplankton species). See Tables S19 and S24 for observation and model component IDs, and mapping.

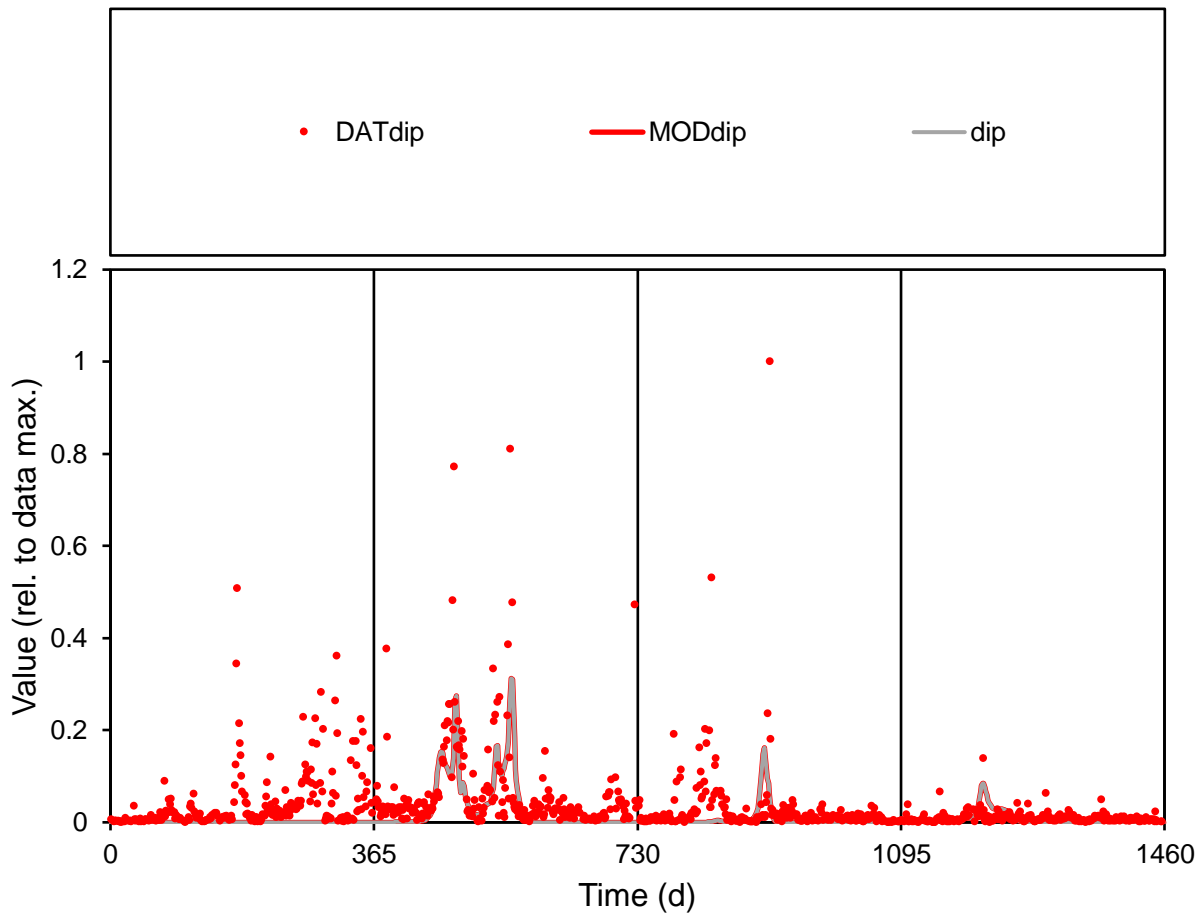

**Figure S1(7). Model - data comparison for observation: dip**

Normalized to max. value of data. Symbols are observations and lines are model. Red line corresponds to observations (e.g. Chlorophyll *a*), others are sub-components (e.g. individual phytoplankton species). See Tables S19 and S24 for observation and model component IDs, and mapping.

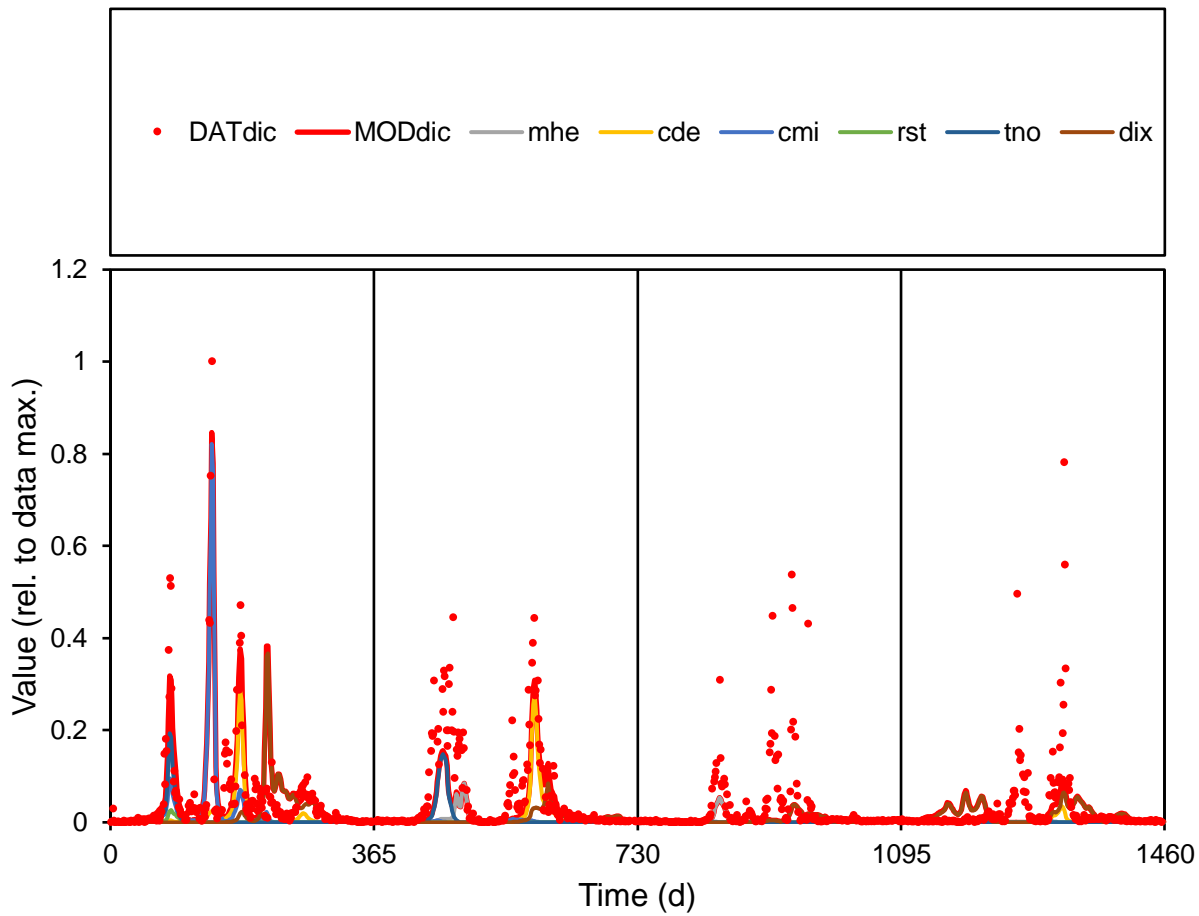

**Figure S1(8). Model - data comparison for observation: dic**

Normalized to max. value of data. Symbols are observations and lines are model. Red line corresponds to observations (e.g. Chlorophyll *a*), others are sub-components (e.g. individual phytoplankton species). See Tables S19 and S24 for observation and model component IDs, and mapping.



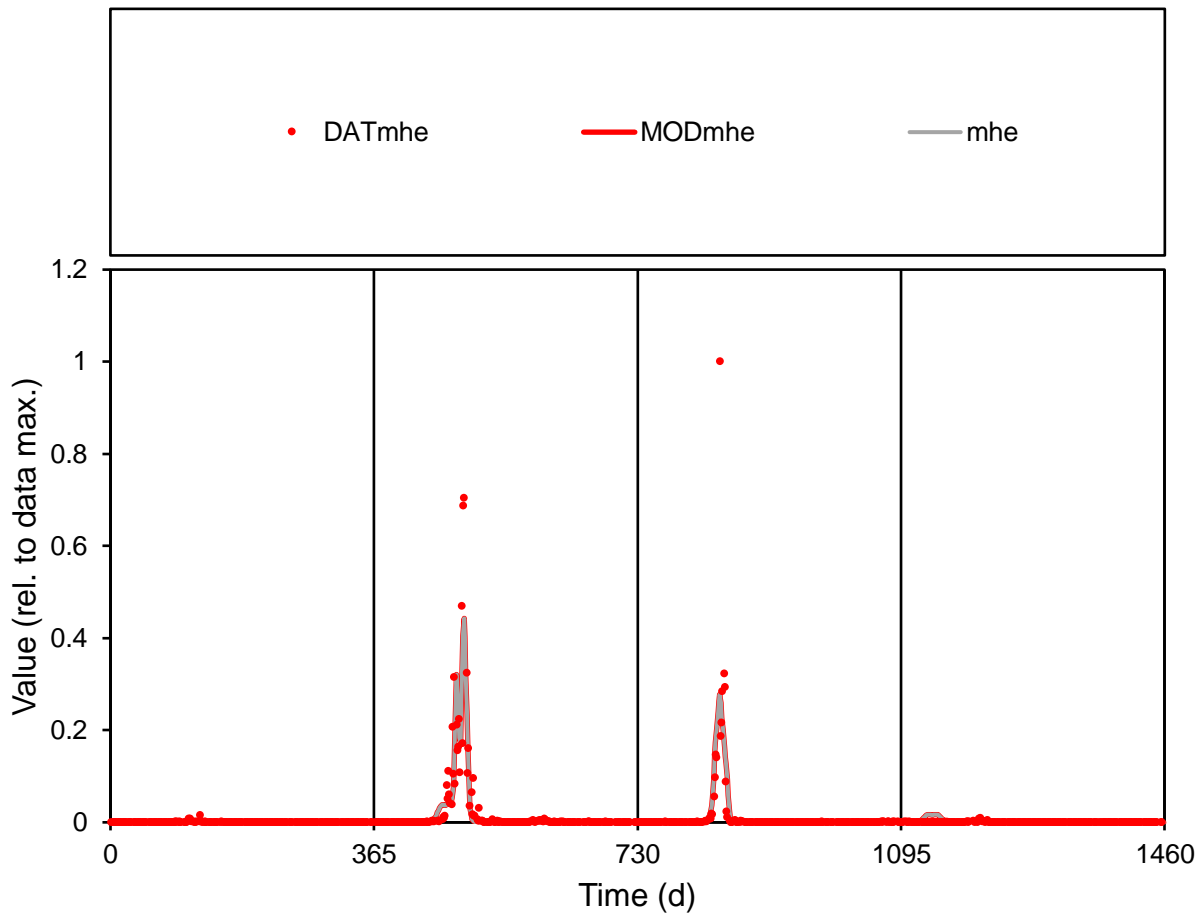

**Figure S1(9). Model - data comparison for observation: mhe**

Normalized to max. value of data. Symbols are observations and lines are model. Red line corresponds to observations (e.g. Chlorophyll *a*), others are sub-components (e.g. individual phytoplankton species). See Tables S19 and S24 for observation and model component IDs, and mapping.

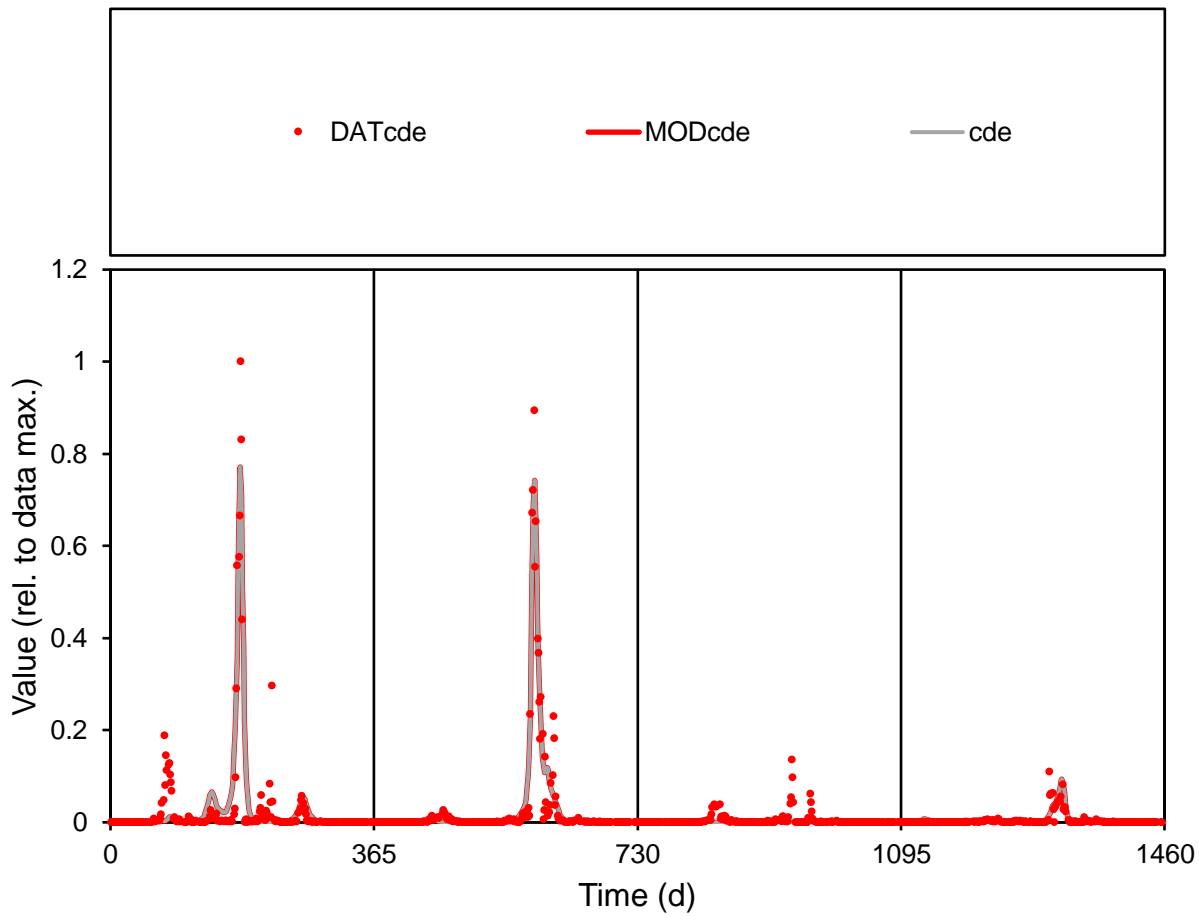

**Figure S1(10). Model - data comparison for observation: cde**

Normalized to max. value of data. Symbols are observations and lines are model. Red line corresponds to observations (e.g. Chlorophyll *a*), others are sub-components (e.g. individual phytoplankton species). See Tables S19 and S24 for observation and model component IDs, and mapping.

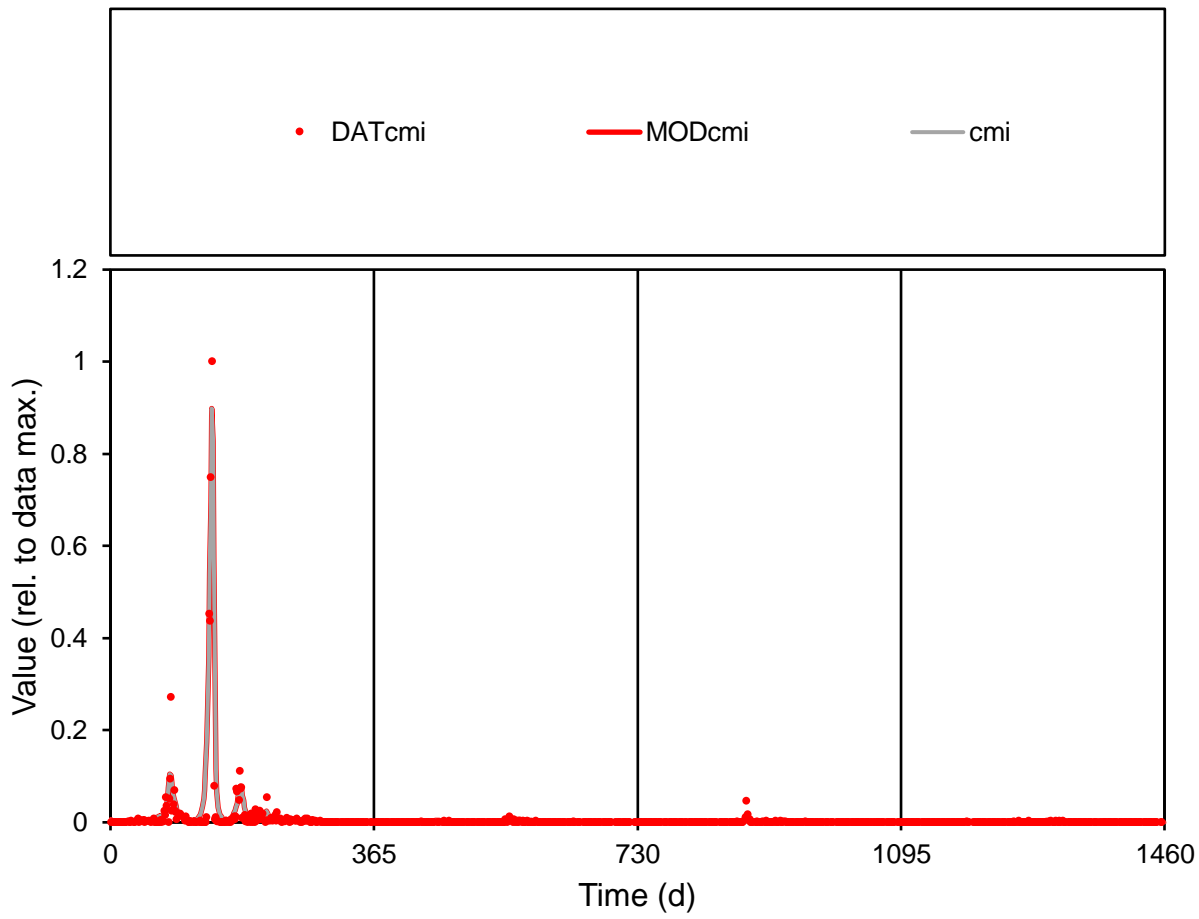

**Figure S1(11). Model - data comparison for observation: cmi**

Normalized to max. value of data. Symbols are observations and lines are model. Red line corresponds to observations (e.g. Chlorophyll *a*), others are sub-components (e.g. individual phytoplankton species). See Tables S19 and S24 for observation and model component IDs, and mapping.

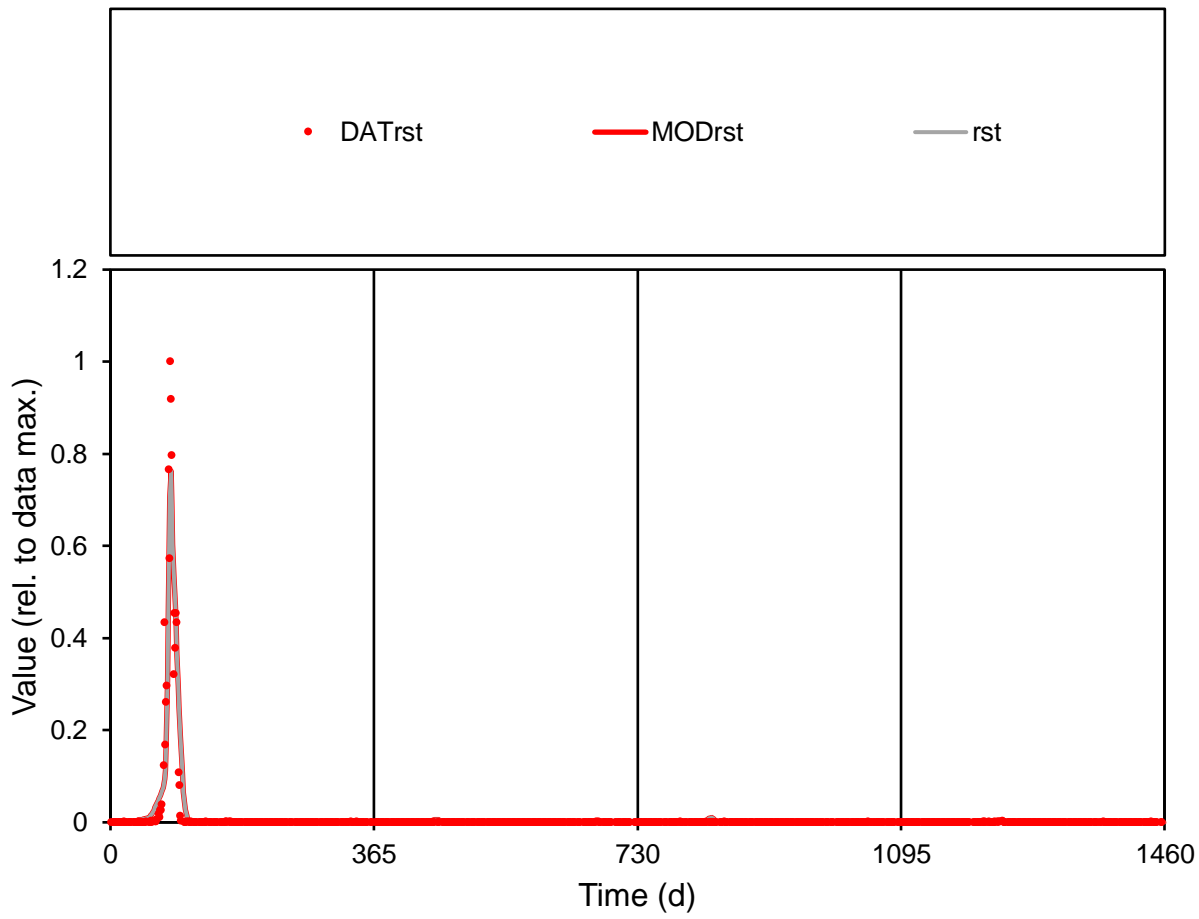

**Figure S1(12). Model - data comparison for observation: rst**

Normalized to max. value of data. Symbols are observations and lines are model. Red line corresponds to observations (e.g. Chlorophyll *a*), others are sub-components (e.g. individual phytoplankton species). See Tables S19 and S24 for observation and model component IDs, and mapping.

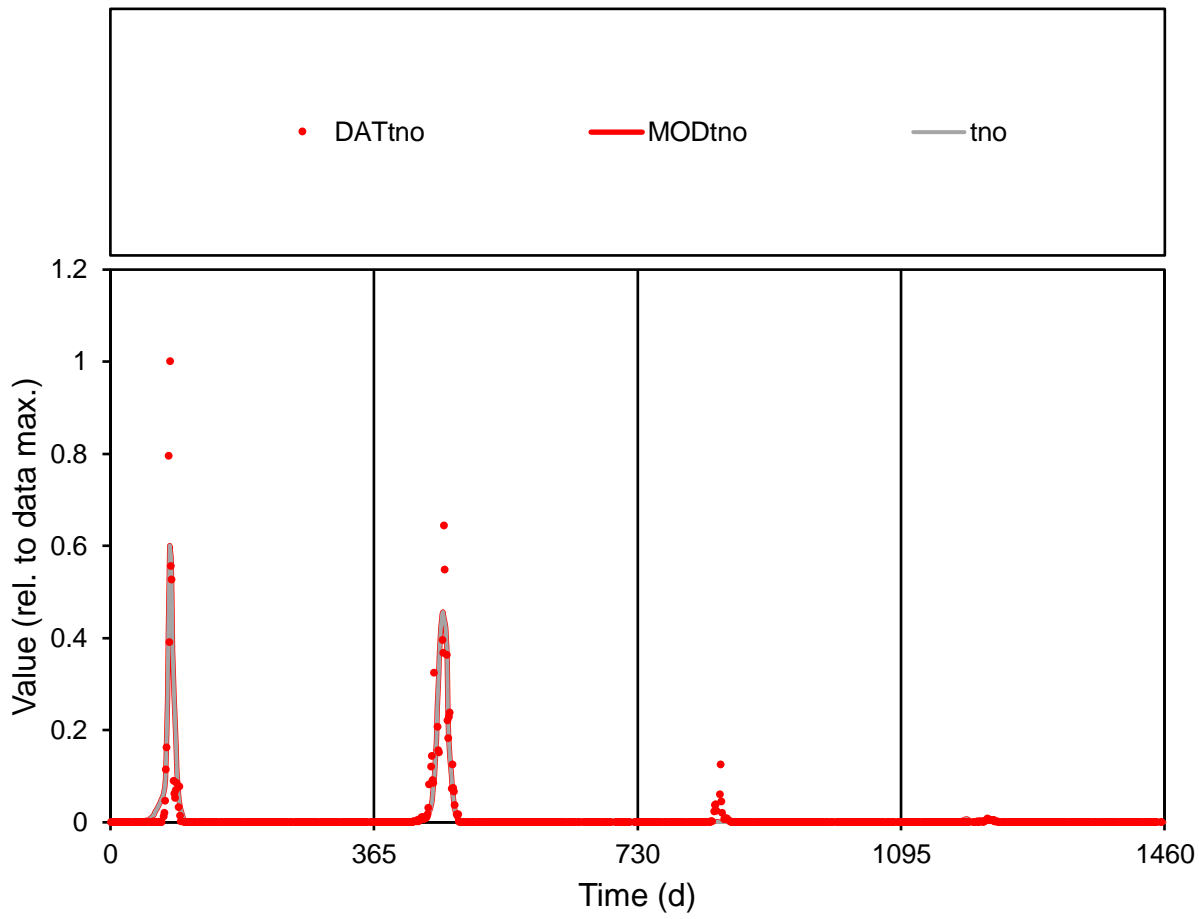

**Figure S1(13). Model - data comparison for observation: tno**

Normalized to max. value of data. Symbols are observations and lines are model. Red line corresponds to observations (e.g. Chlorophyll *a*), others are sub-components (e.g. individual phytoplankton species). See Tables S19 and S24 for observation and model component IDs, and mapping.

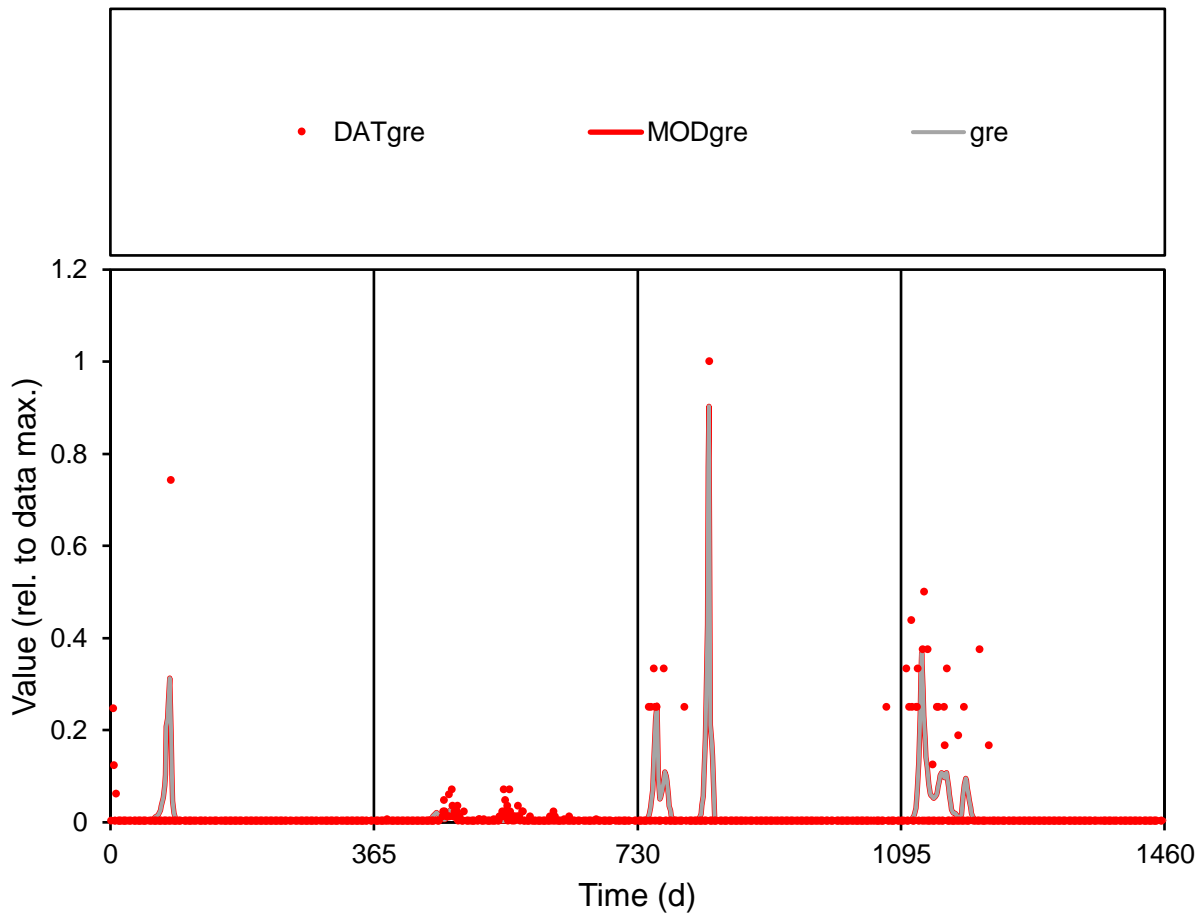

**Figure S1(14). Model - data comparison for observation: gre**

Normalized to max. value of data. Symbols are observations and lines are model. Red line corresponds to observations (e.g. Chlorophyll *a*), others are sub-components (e.g. individual phytoplankton species). See Tables S19 and S24 for observation and model component IDs, and mapping.

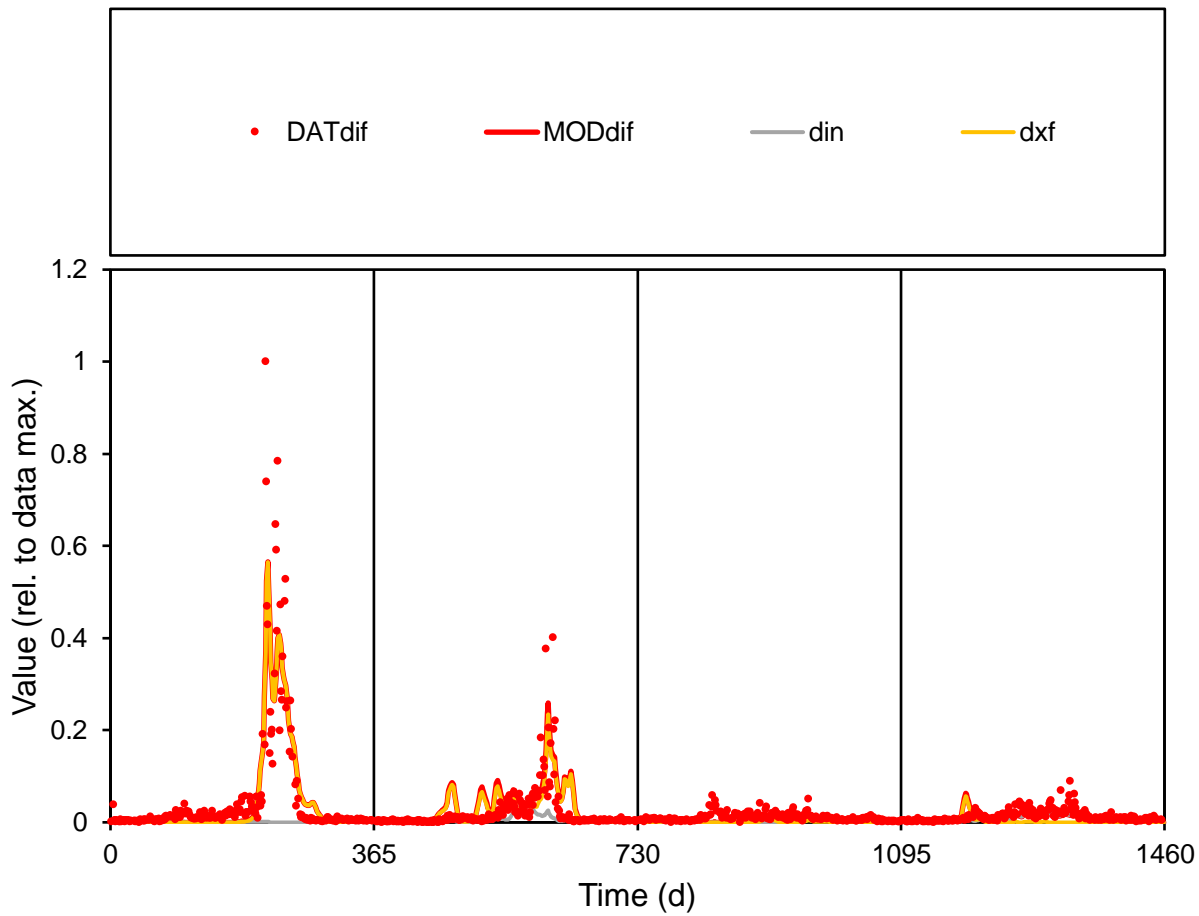

**Figure S1(15). Model - data comparison for observation: dif**

Normalized to max. value of data. Symbols are observations and lines are model. Red line corresponds to observations (e.g. Chlorophyll *a*), others are sub-components (e.g. individual phytoplankton species). See Tables S19 and S24 for observation and model component IDs, and mapping.

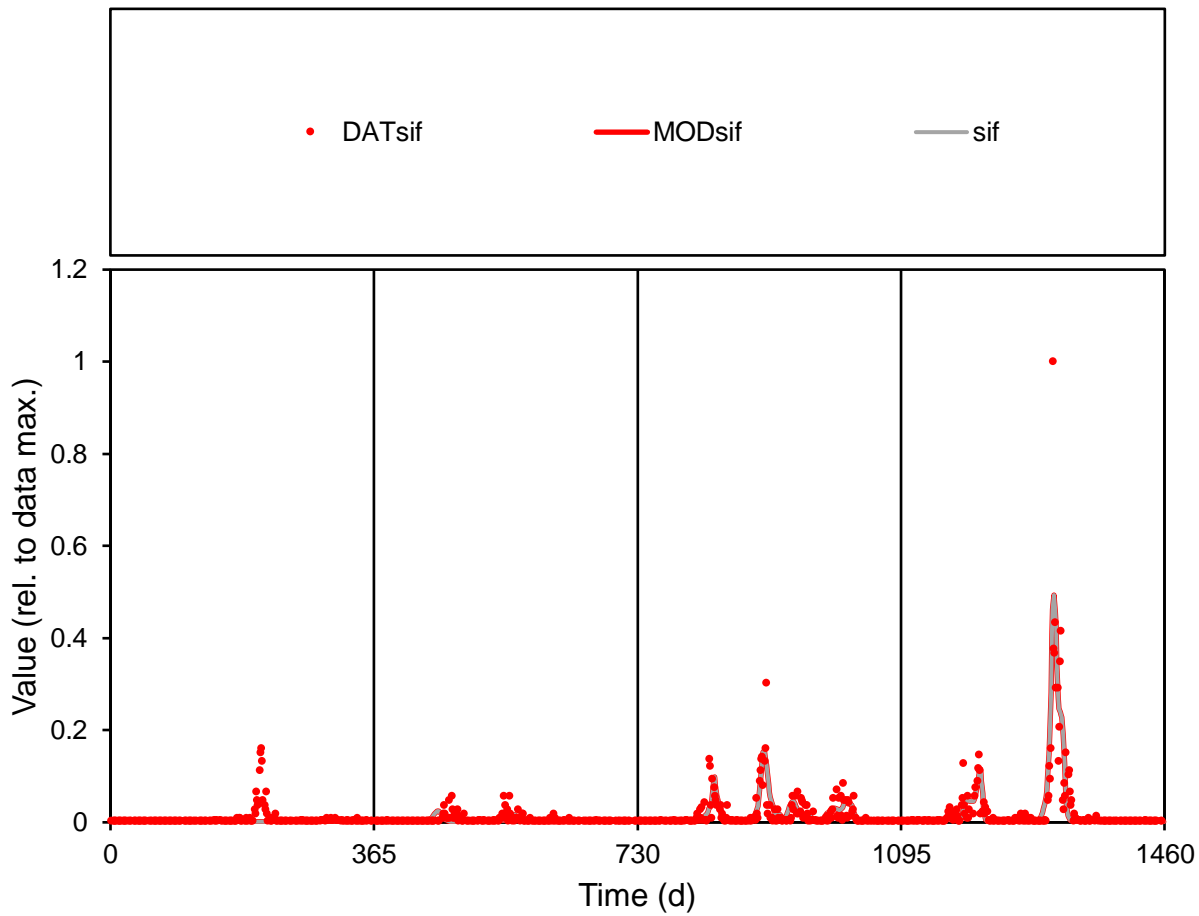

**Figure S1(16). Model - data comparison for observation: sif**

Normalized to max. value of data. Symbols are observations and lines are model. Red line corresponds to observations (e.g. Chlorophyll *a*), others are sub-components (e.g. individual phytoplankton species). See Tables S19 and S24 for observation and model component IDs, and mapping.



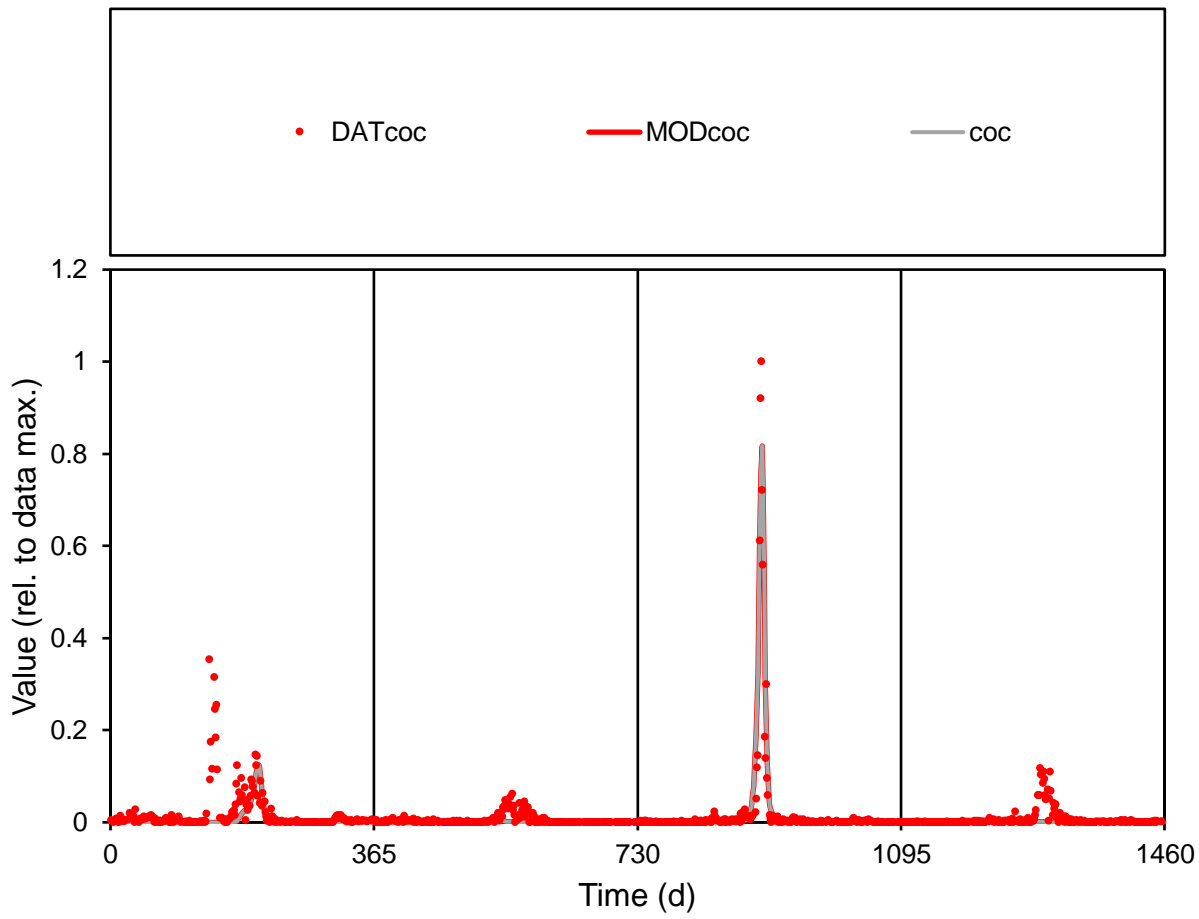

**Figure S1(17). Model - data comparison for observation: coc**

Normalized to max. value of data. Symbols are observations and lines are model. Red line corresponds to observations (e.g. Chlorophyll *a*), others are sub-components (e.g. individual phytoplankton species). See Tables S19 and S24 for observation and model component IDs, and mapping.

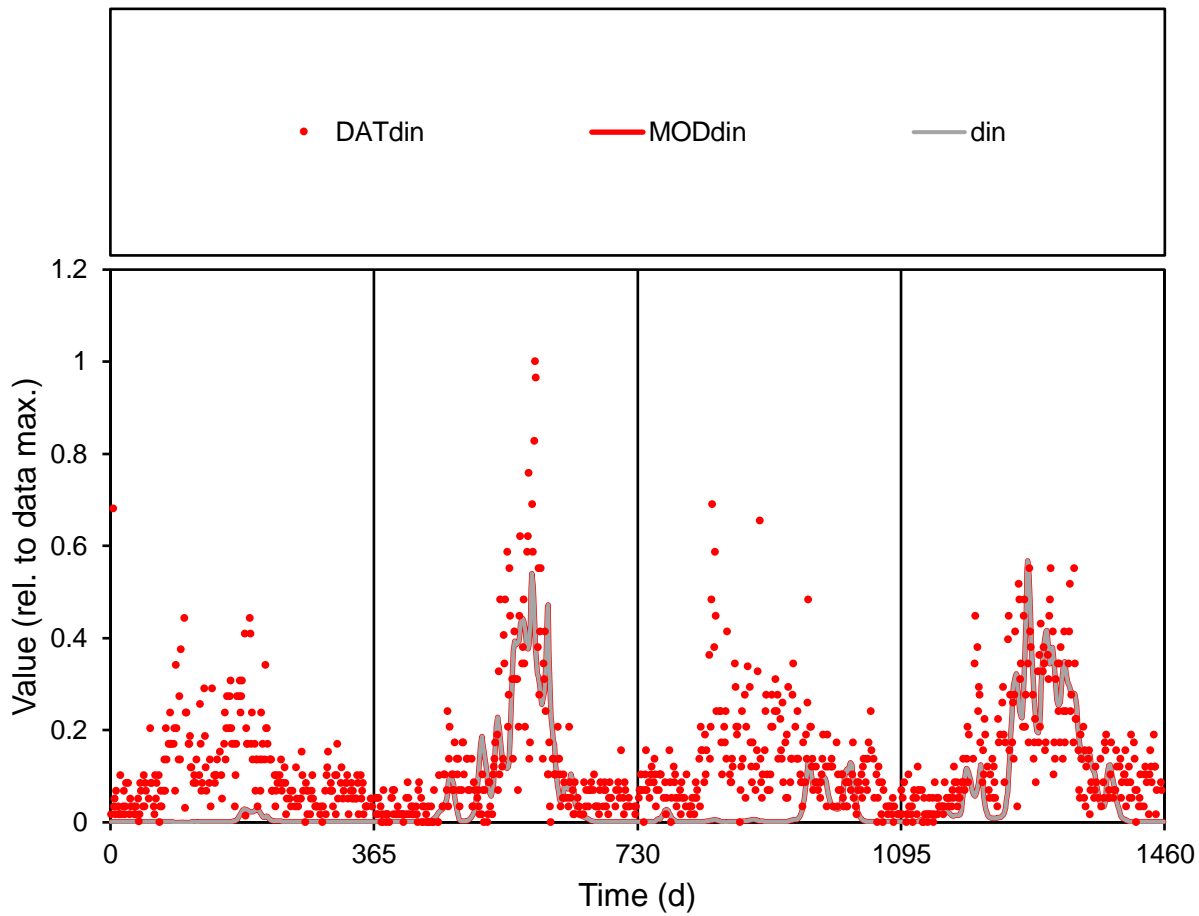

**Figure S1(18). Model - data comparison for observation: din**

Normalized to max. value of data. Symbols are observations and lines are model. Red line corresponds to observations (e.g. Chlorophyll *a*), others are sub-components (e.g. individual phytoplankton species). See Tables S19 and S24 for observation and model component IDs, and mapping.

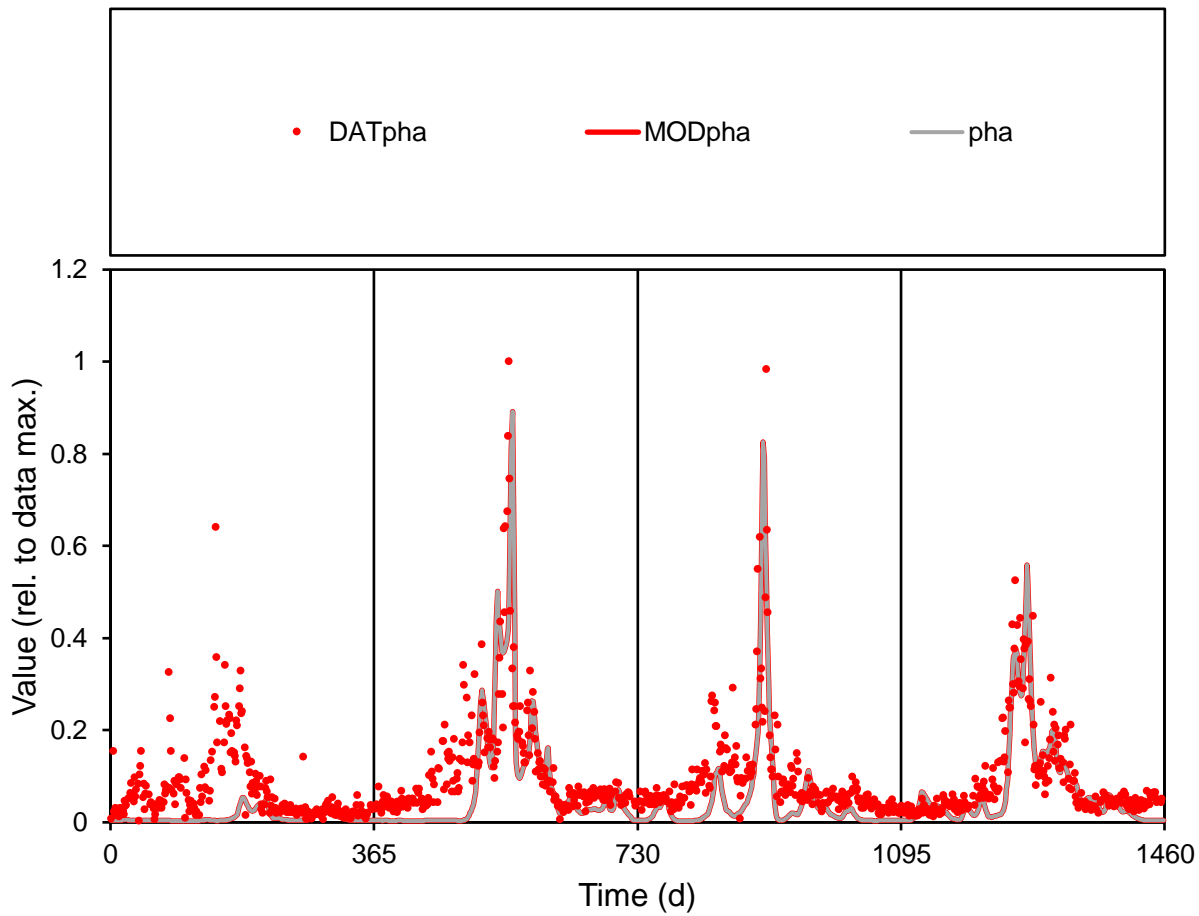

**Figure S1(19). Model - data comparison for observation: pha**

Normalized to max. value of data. Symbols are observations and lines are model. Red line corresponds to observations (e.g. Chlorophyll *a*), others are sub-components (e.g. individual phytoplankton species). See Tables S19 and S24 for observation and model component IDs, and mapping.

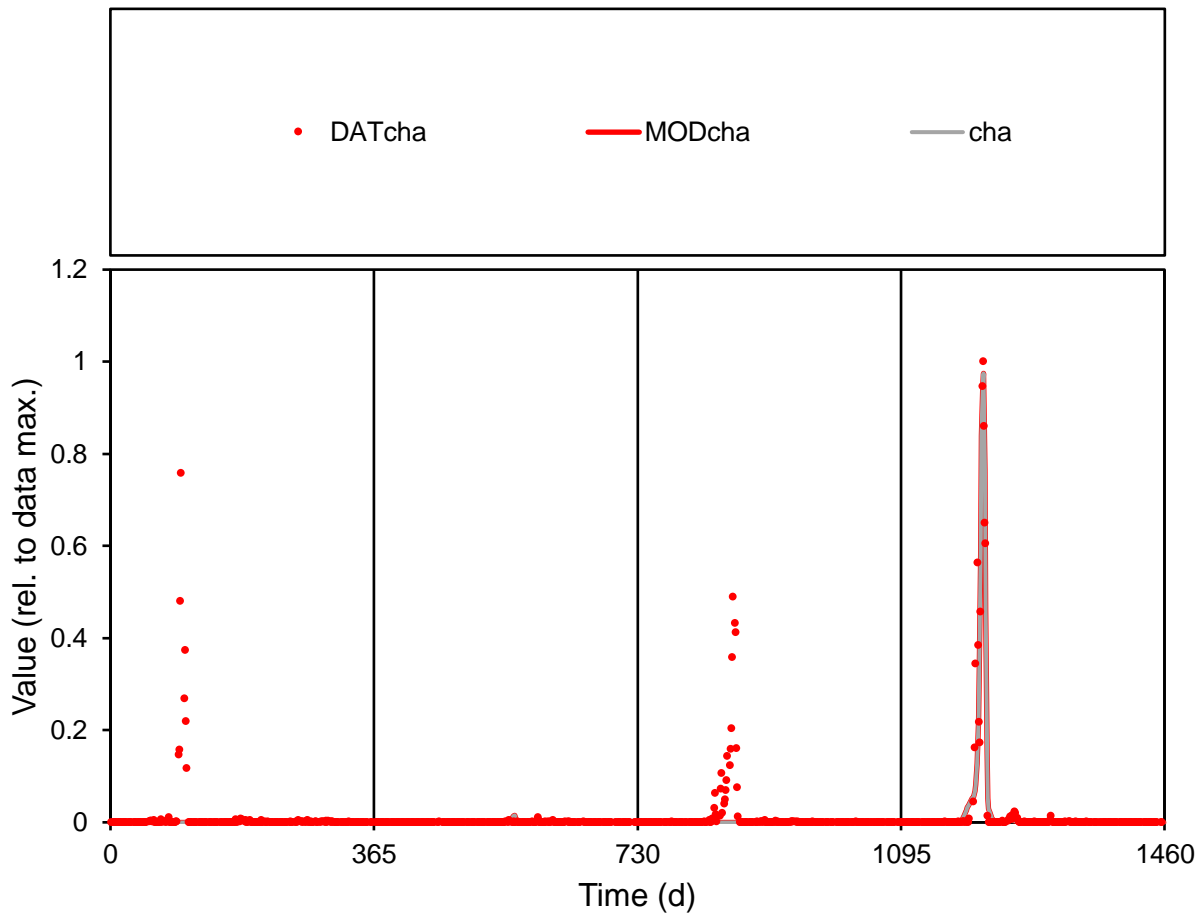

**Figure S1(20). Model - data comparison for observation: cha**

Normalized to max. value of data. Symbols are observations and lines are model. Red line corresponds to observations (e.g. Chlorophyll *a*), others are sub-components (e.g. individual phytoplankton species). See Tables S19 and S24 for observation and model component IDs, and mapping.

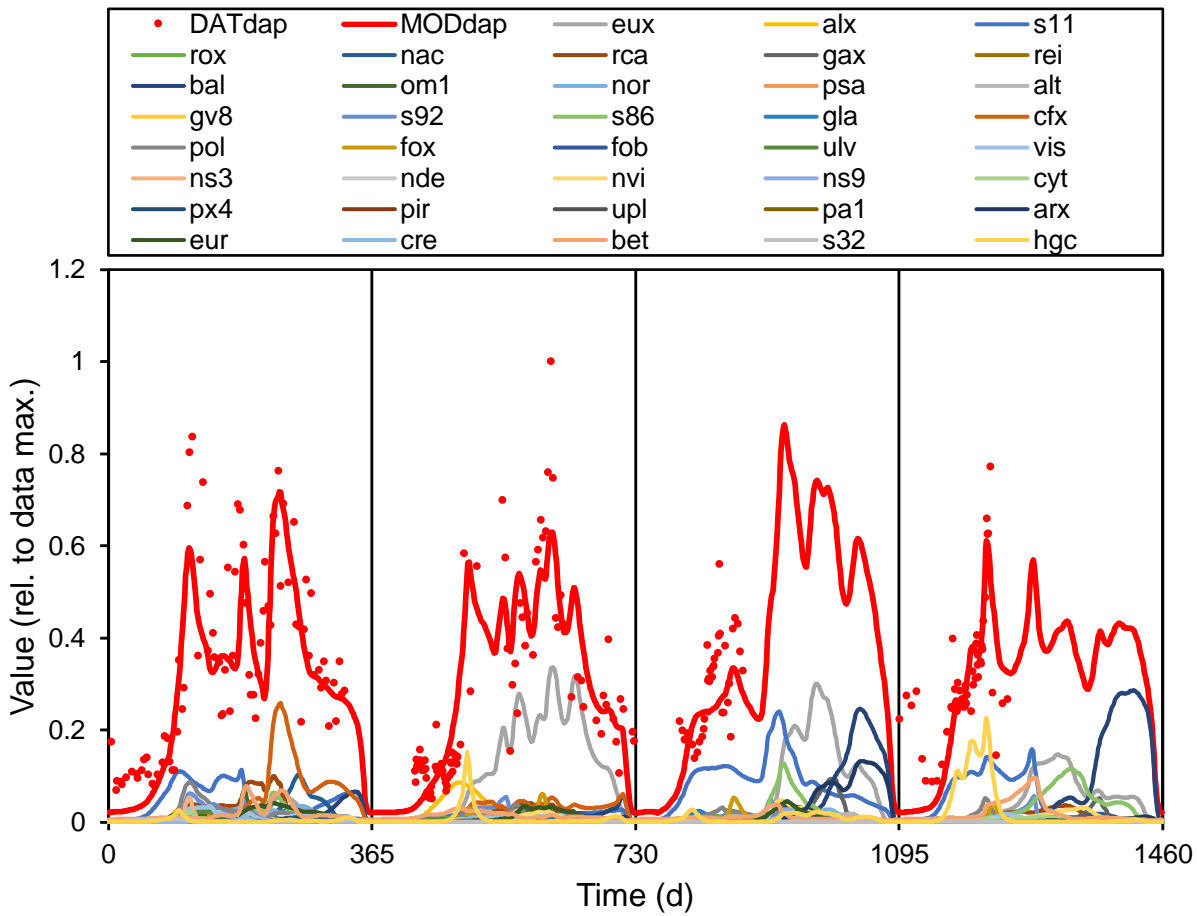

**Figure S1(21). Model - data comparison for observation: dap**

Normalized to max. value of data. Symbols are observations and lines are model. Red line corresponds to observations (e.g. Chlorophyll *a*), others are sub-components (e.g. individual phytoplankton species). See Tables S19 and S24 for observation and model component IDs, and mapping.



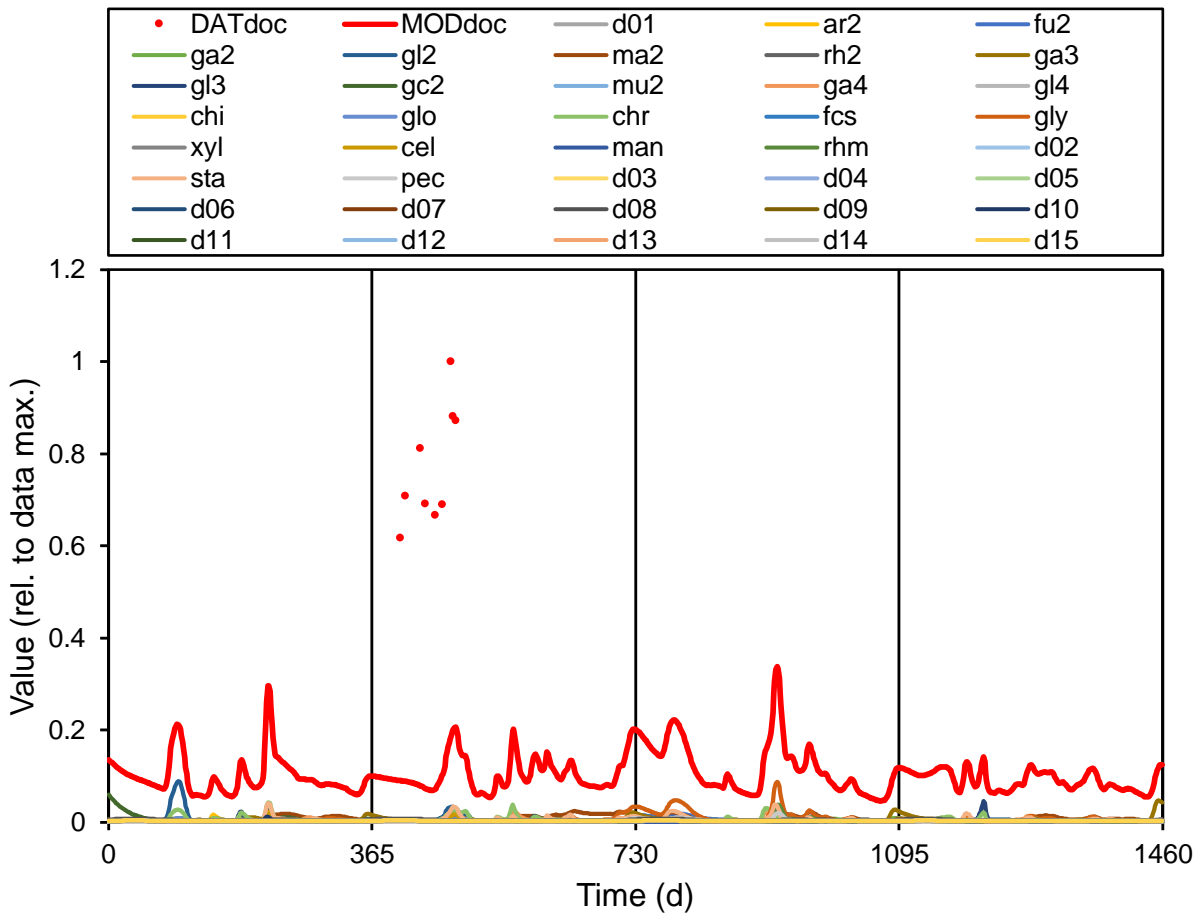

**Figure S1(23). Model - data comparison for observation: doc**

Normalized to max. value of data. Symbols are observations and lines are model. Red line corresponds to observations (e.g. Chlorophyll *a*), others are sub-components (e.g. individual phytoplankton species). See Tables S19 and S24 for observation and model component IDs, and mapping.

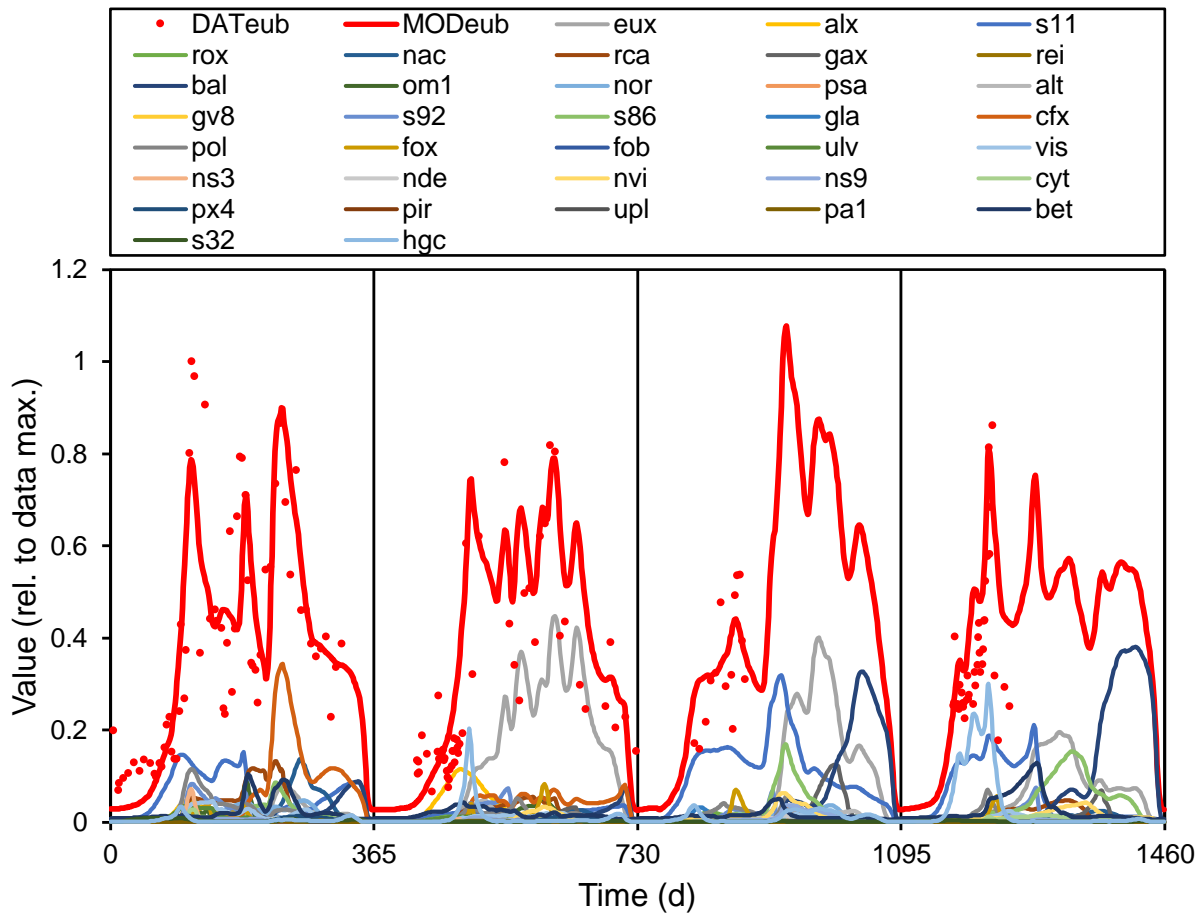

**Figure S1(24). Model - data comparison for observation: eub**

Normalized to max. value of data. Symbols are observations and lines are model. Red line corresponds to observations (e.g. Chlorophyll *a*), others are sub-components (e.g. individual phytoplankton species). See Tables S19 and S24 for observation and model component IDs, and mapping.



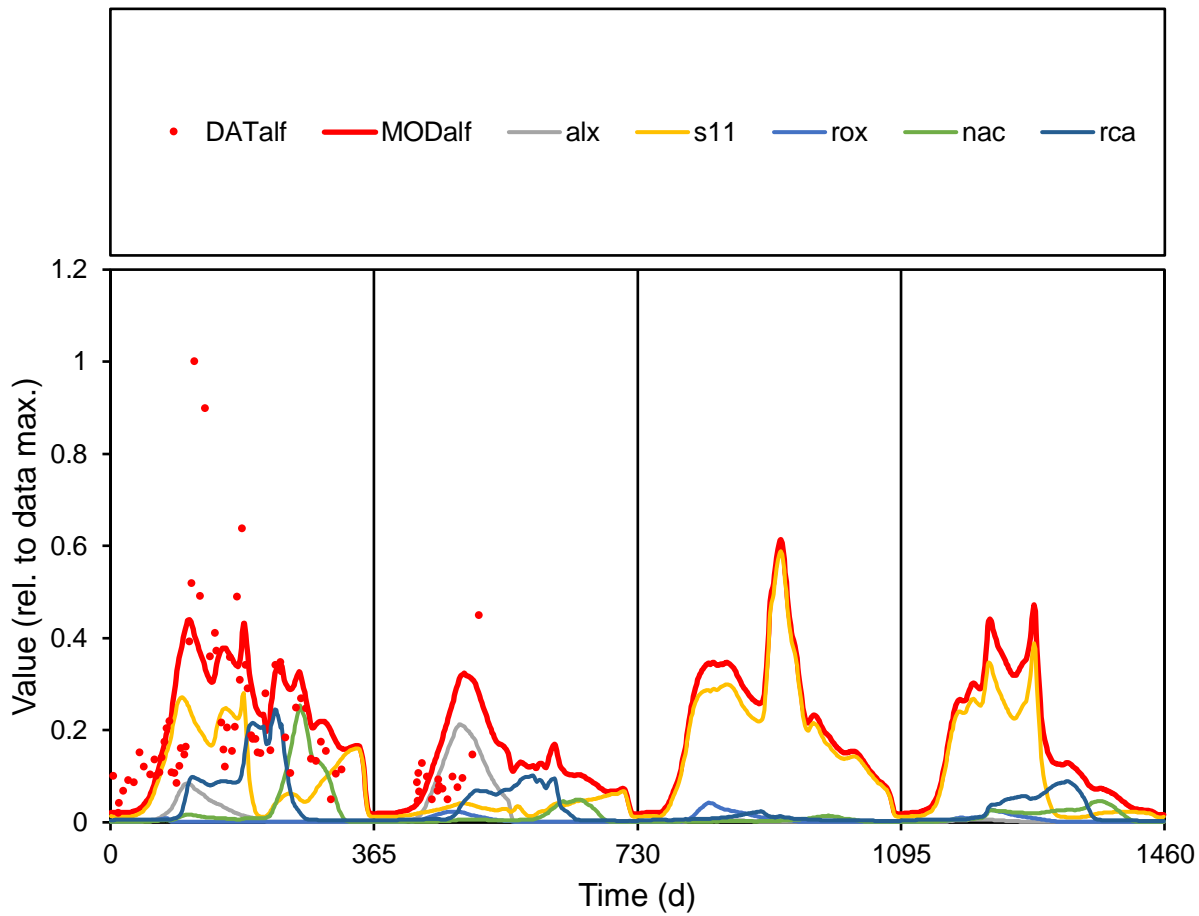

**Figure S1(25). Model - data comparison for observation: alf**

Normalized to max. value of data. Symbols are observations and lines are model. Red line corresponds to observations (e.g. Chlorophyll *a*), others are sub-components (e.g. individual phytoplankton species). See Tables S19 and S24 for observation and model component IDs, and mapping.

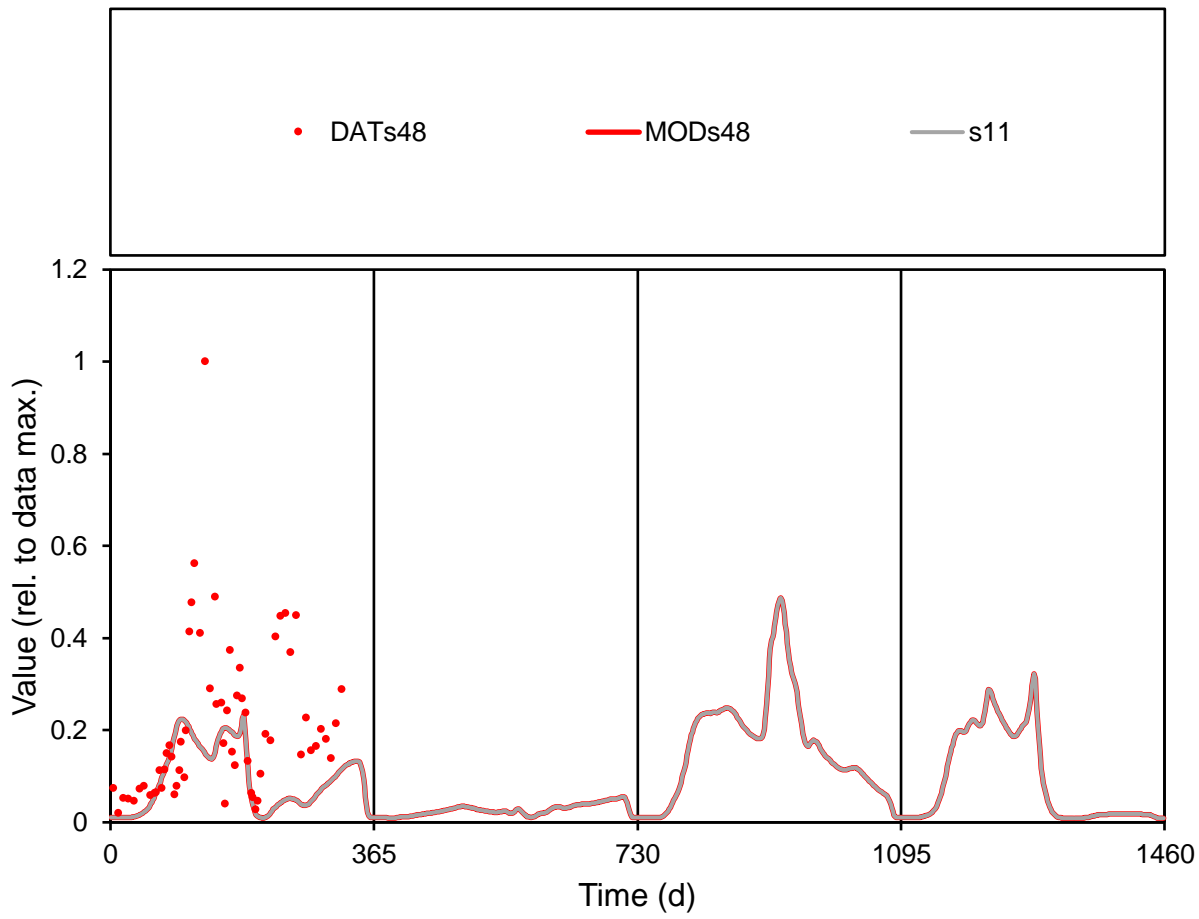

**Figure S1(26). Model - data comparison for observation: s48**

Normalized to max. value of data. Symbols are observations and lines are model. Red line corresponds to observations (e.g. Chlorophyll *a*), others are sub-components (e.g. individual phytoplankton species). See Tables S19 and S24 for observation and model component IDs, and mapping.

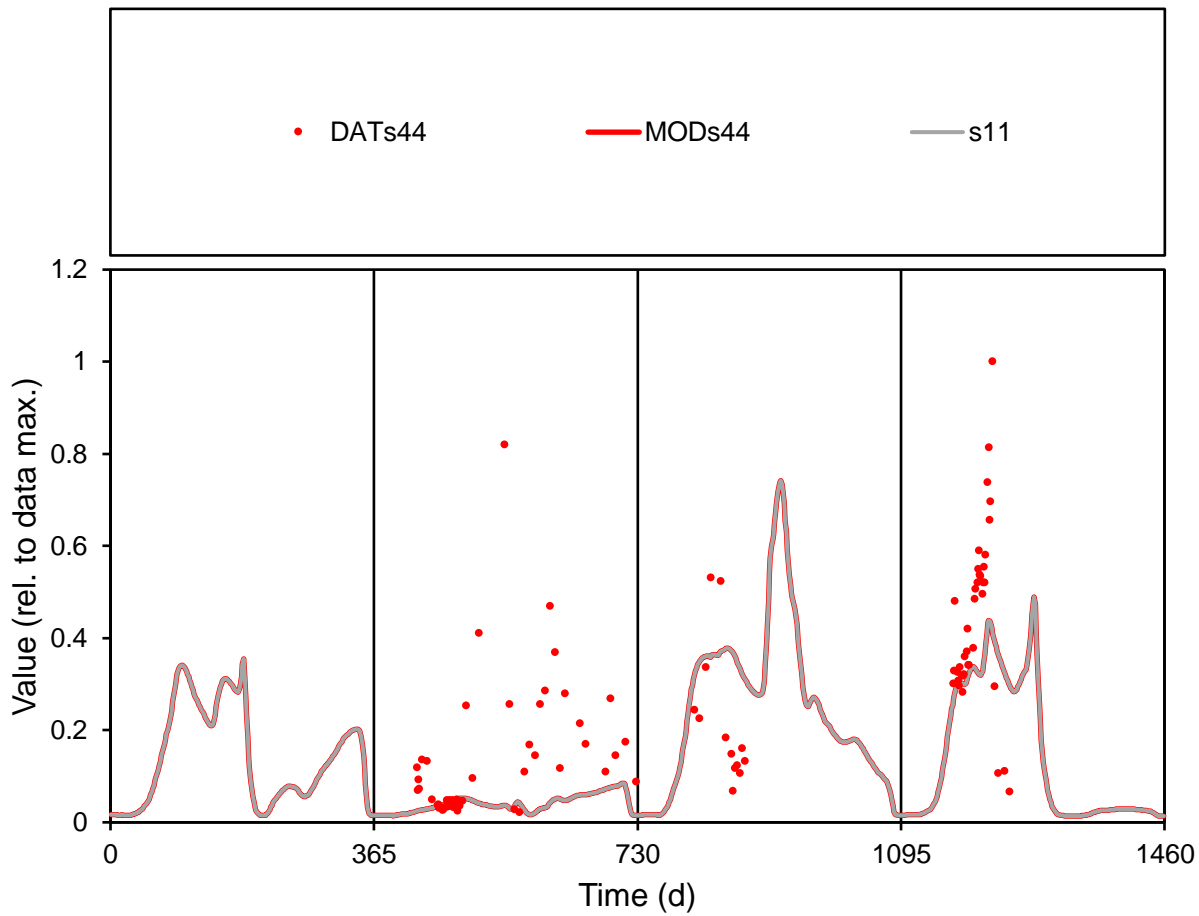

**Figure S1(27). Model - data comparison for observation: s44**

Normalized to max. value of data. Symbols are observations and lines are model. Red line corresponds to observations (e.g. Chlorophyll *a*), others are sub-components (e.g. individual phytoplankton species). See Tables S19 and S24 for observation and model component IDs, and mapping.

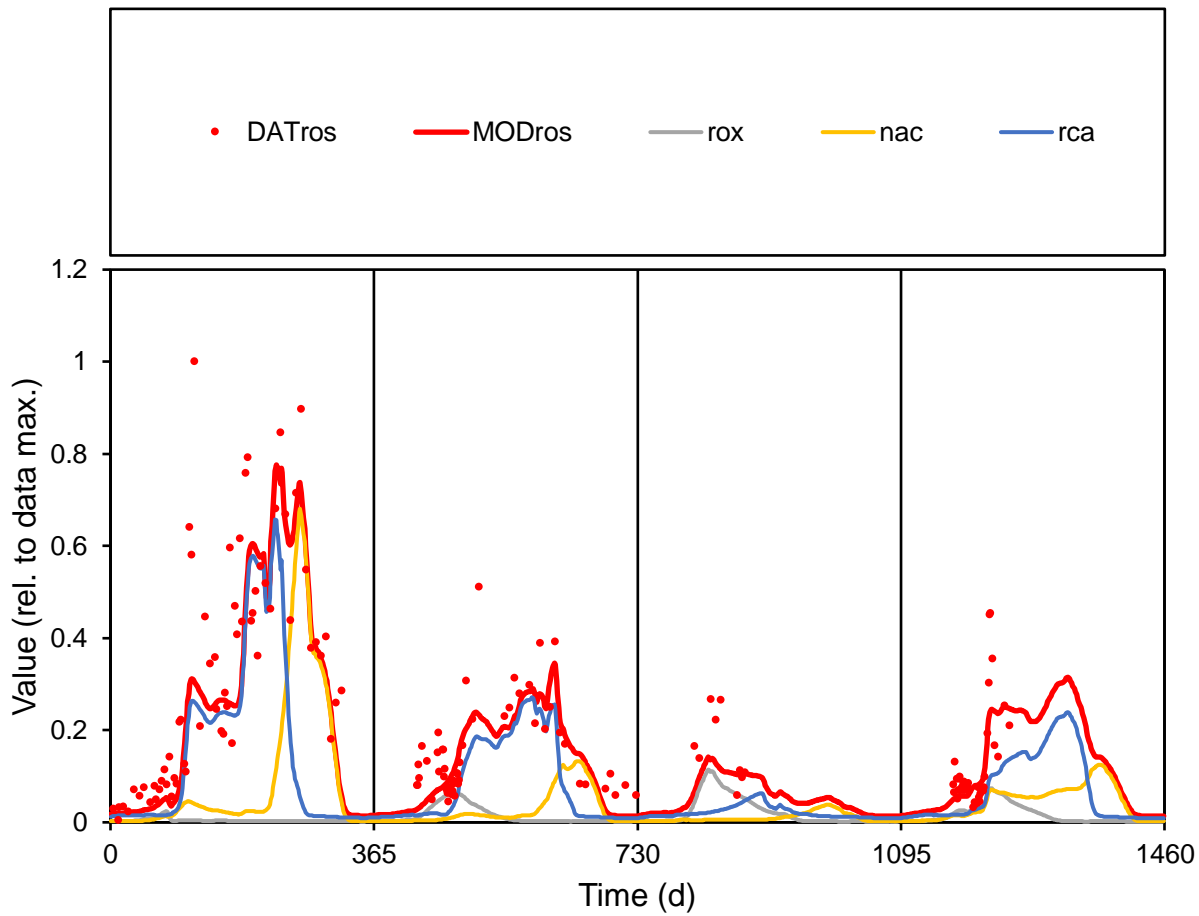

**Figure S1(28). Model - data comparison for observation: ros**

Normalized to max. value of data. Symbols are observations and lines are model. Red line corresponds to observations (e.g. Chlorophyll *a*), others are sub-components (e.g. individual phytoplankton species). See Tables S19 and S24 for observation and model component IDs, and mapping.

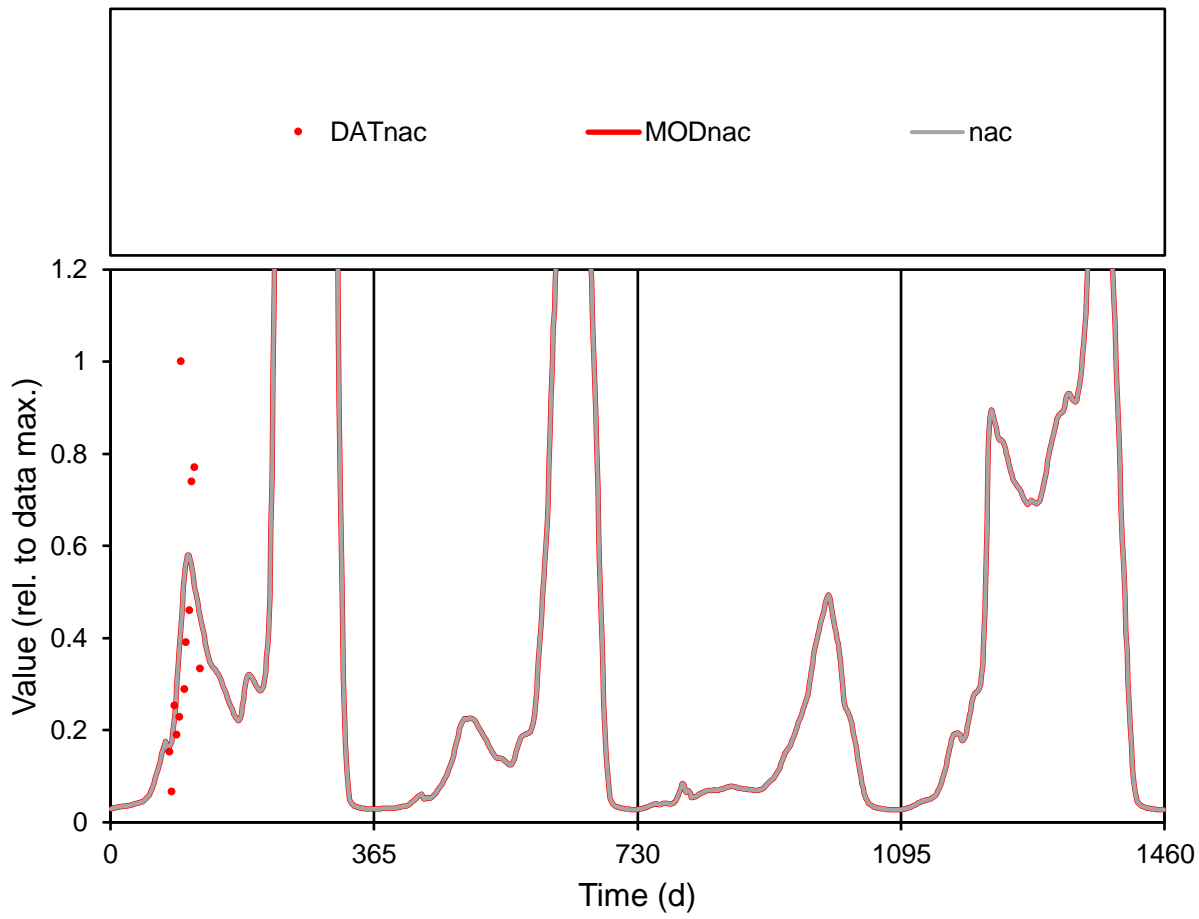

**Figure S1(29). Model - data comparison for observation: nac**

Normalized to max. value of data. Symbols are observations and lines are model. Red line corresponds to observations (e.g. Chlorophyll *a*), others are sub-components (e.g. individual phytoplankton species). See Tables S19 and S24 for observation and model component IDs, and mapping.

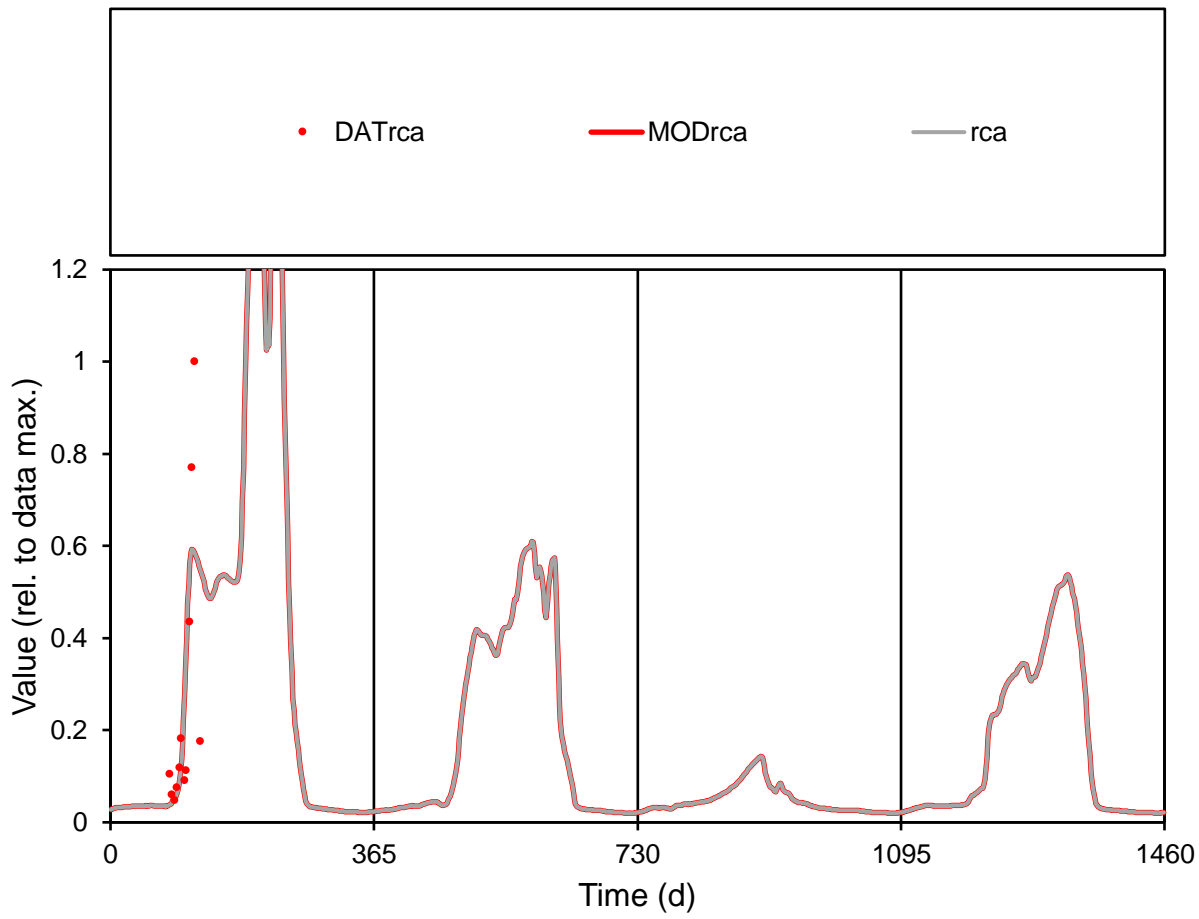

**Figure S1(30). Model - data comparison for observation: rca**

Normalized to max. value of data. Symbols are observations and lines are model. Red line corresponds to observations (e.g. Chlorophyll *a*), others are sub-components (e.g. individual phytoplankton species). See Tables S19 and S24 for observation and model component IDs, and mapping.

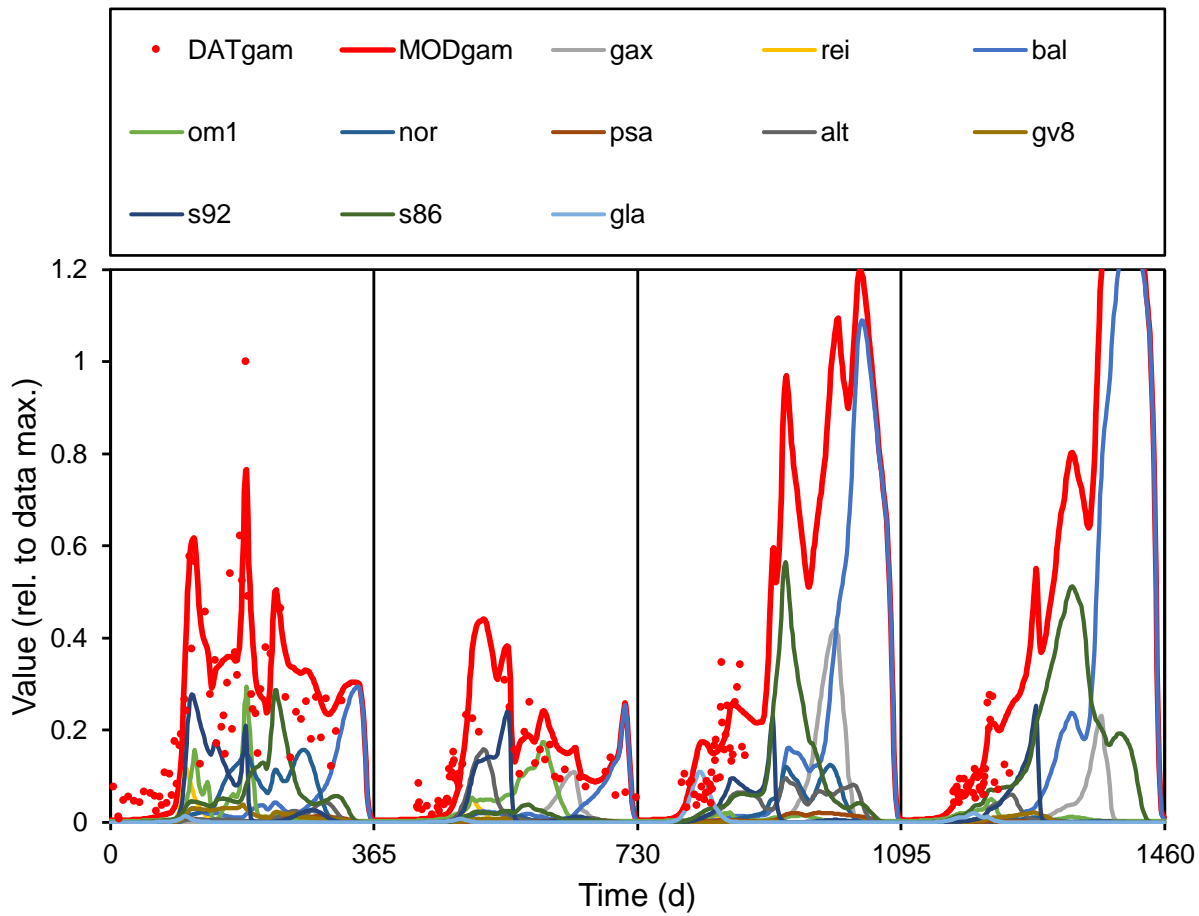

**Figure S1(31). Model - data comparison for observation: gam**

Normalized to max. value of data. Symbols are observations and lines are model. Red line corresponds to observations (e.g. Chlorophyll *a*), others are sub-components (e.g. individual phytoplankton species). See Tables S19 and S24 for observation and model component IDs, and mapping.

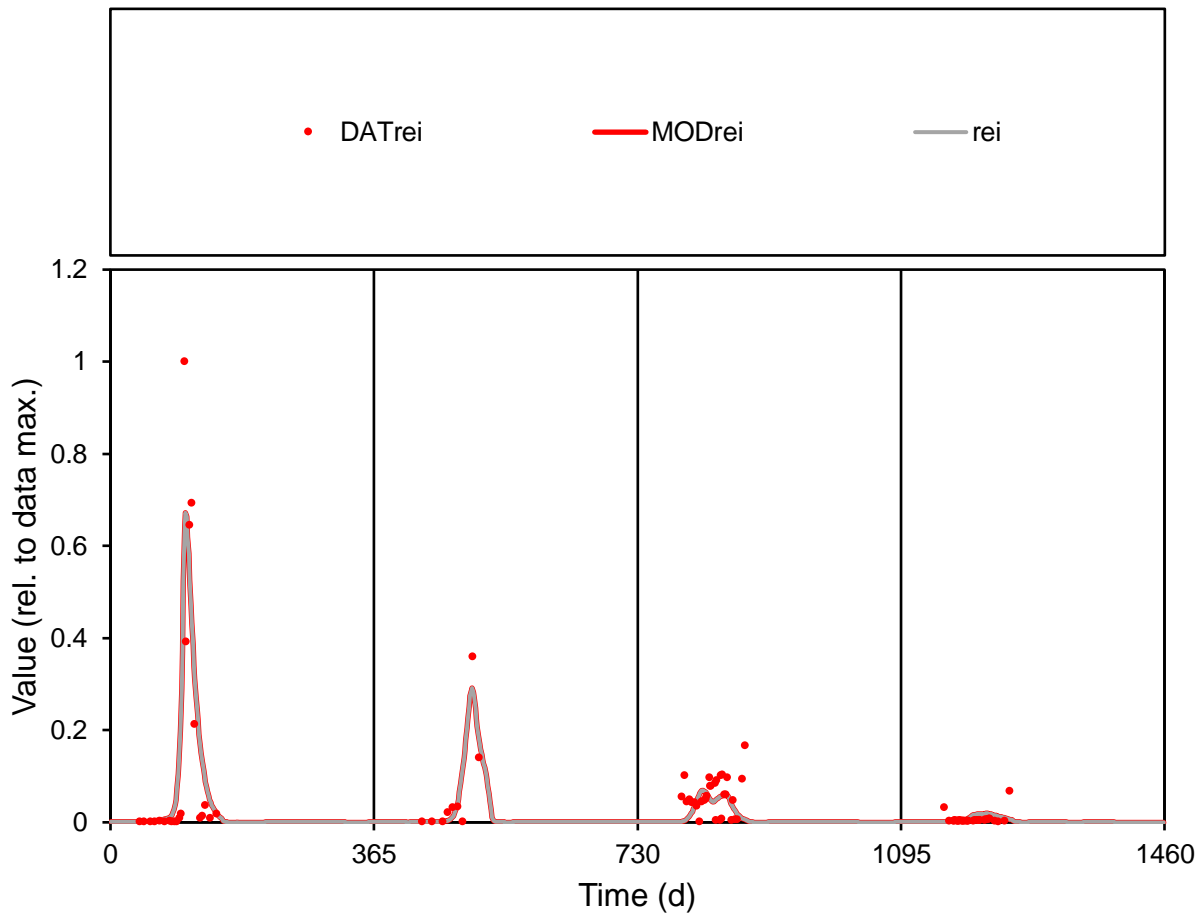

**Figure S1(32). Model - data comparison for observation: rei**

Normalized to max. value of data. Symbols are observations and lines are model. Red line corresponds to observations (e.g. Chlorophyll *a*), others are sub-components (e.g. individual phytoplankton species). See Tables S19 and S24 for observation and model component IDs, and mapping.



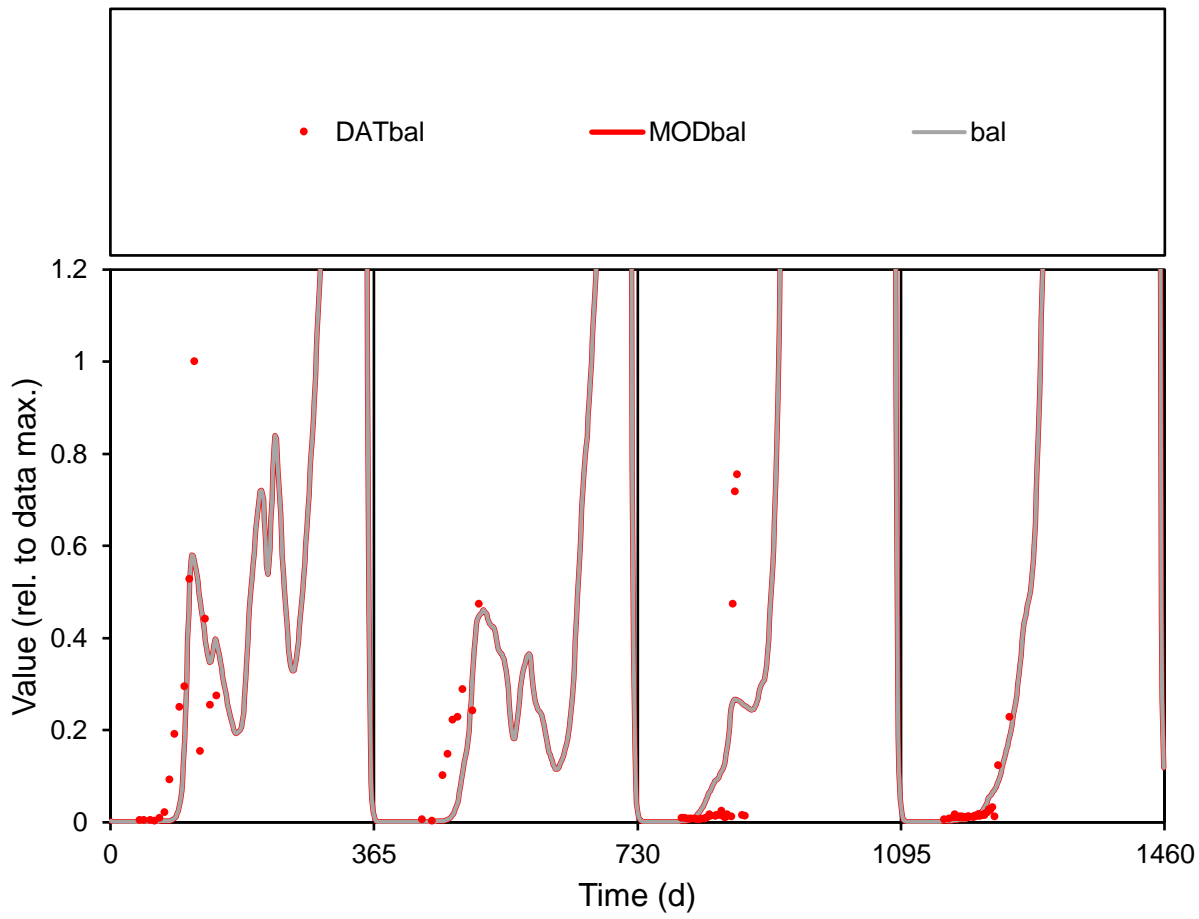

**Figure S1(33). Model - data comparison for observation: bal**

Normalized to max. value of data. Symbols are observations and lines are model. Red line corresponds to observations (e.g. Chlorophyll *a*), others are sub-components (e.g. individual phytoplankton species). See Tables S19 and S24 for observation and model component IDs, and mapping.

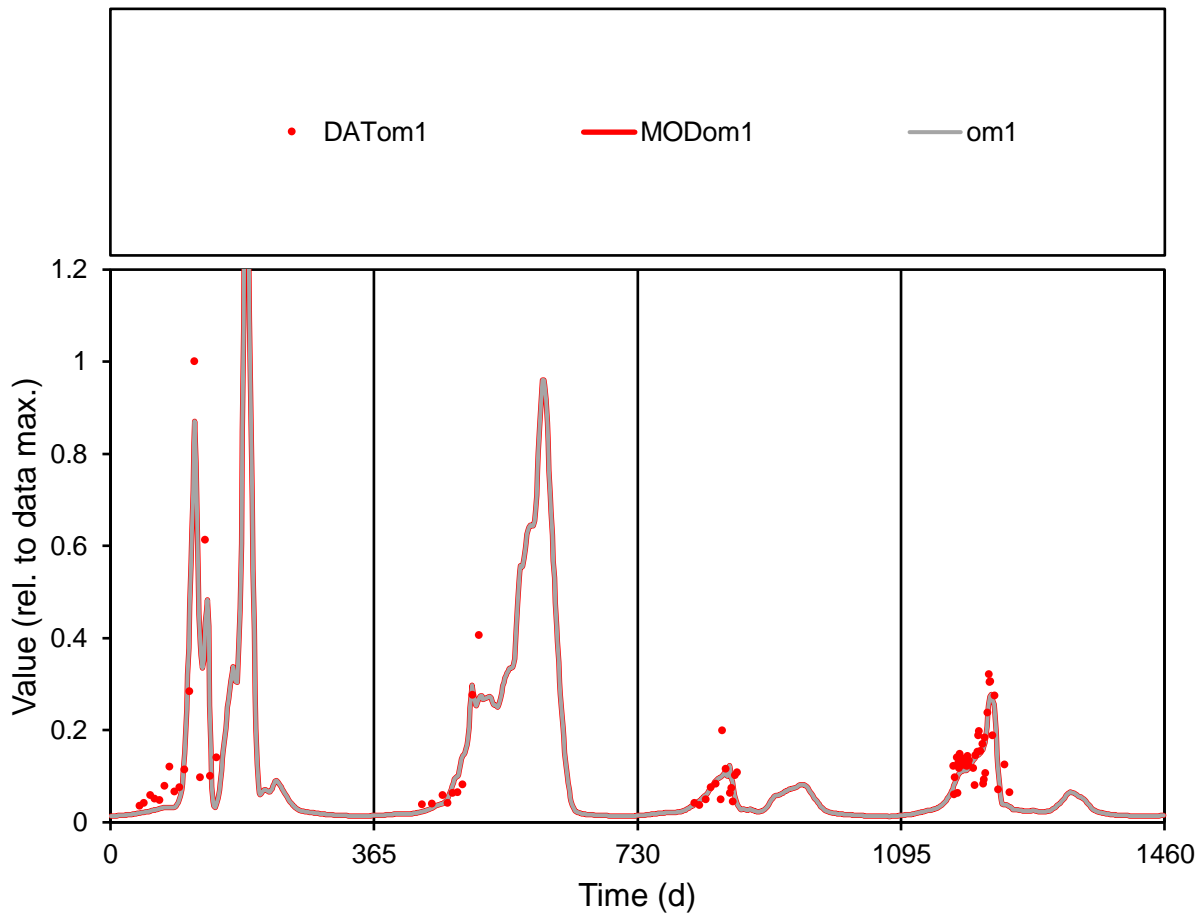

**Figure S1(34). Model - data comparison for observation: om1**

Normalized to max. value of data. Symbols are observations and lines are model. Red line corresponds to observations (e.g. Chlorophyll *a*), others are sub-components (e.g. individual phytoplankton species). See Tables S19 and S24 for observation and model component IDs, and mapping.

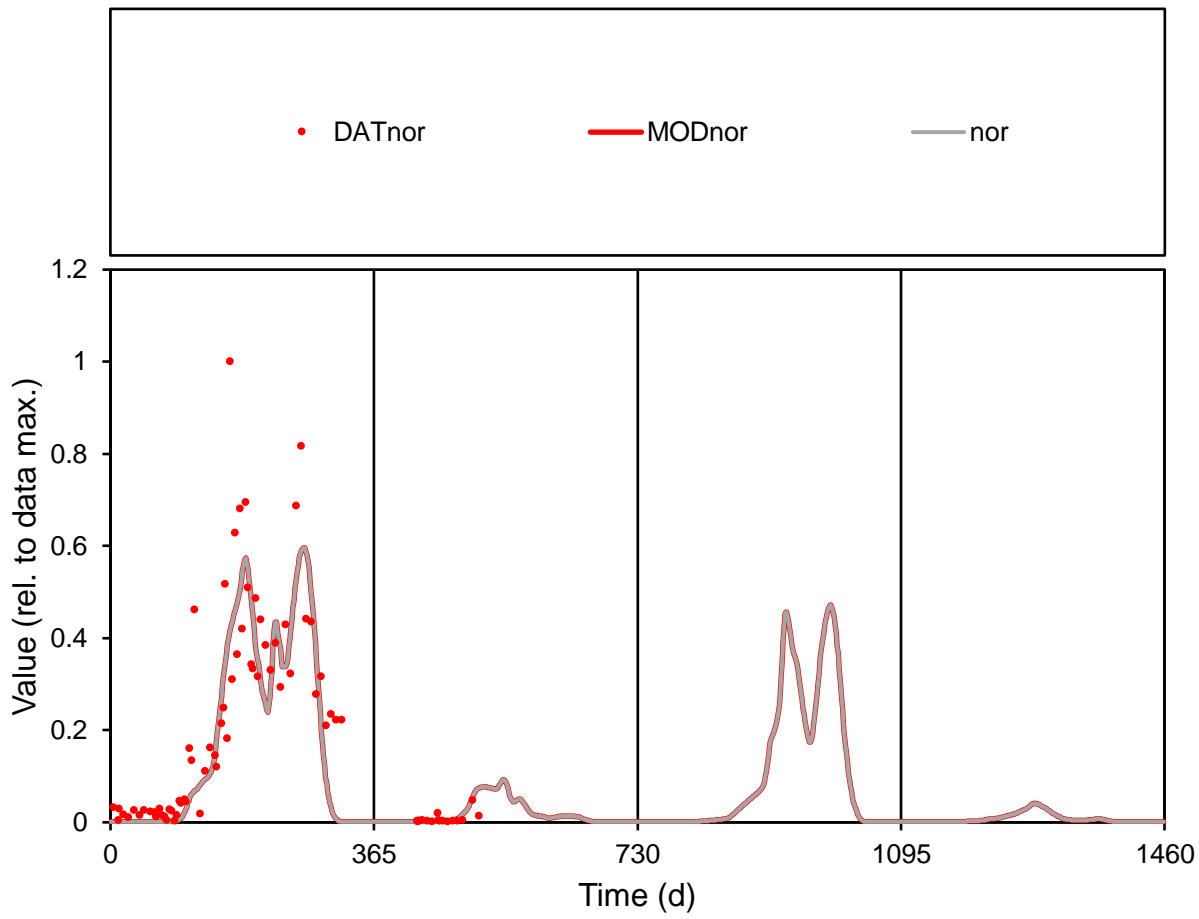

**Figure S1(35). Model - data comparison for observation: nor**

Normalized to max. value of data. Symbols are observations and lines are model. Red line corresponds to observations (e.g. Chlorophyll *a*), others are sub-components (e.g. individual phytoplankton species). See Tables S19 and S24 for observation and model component IDs, and mapping.

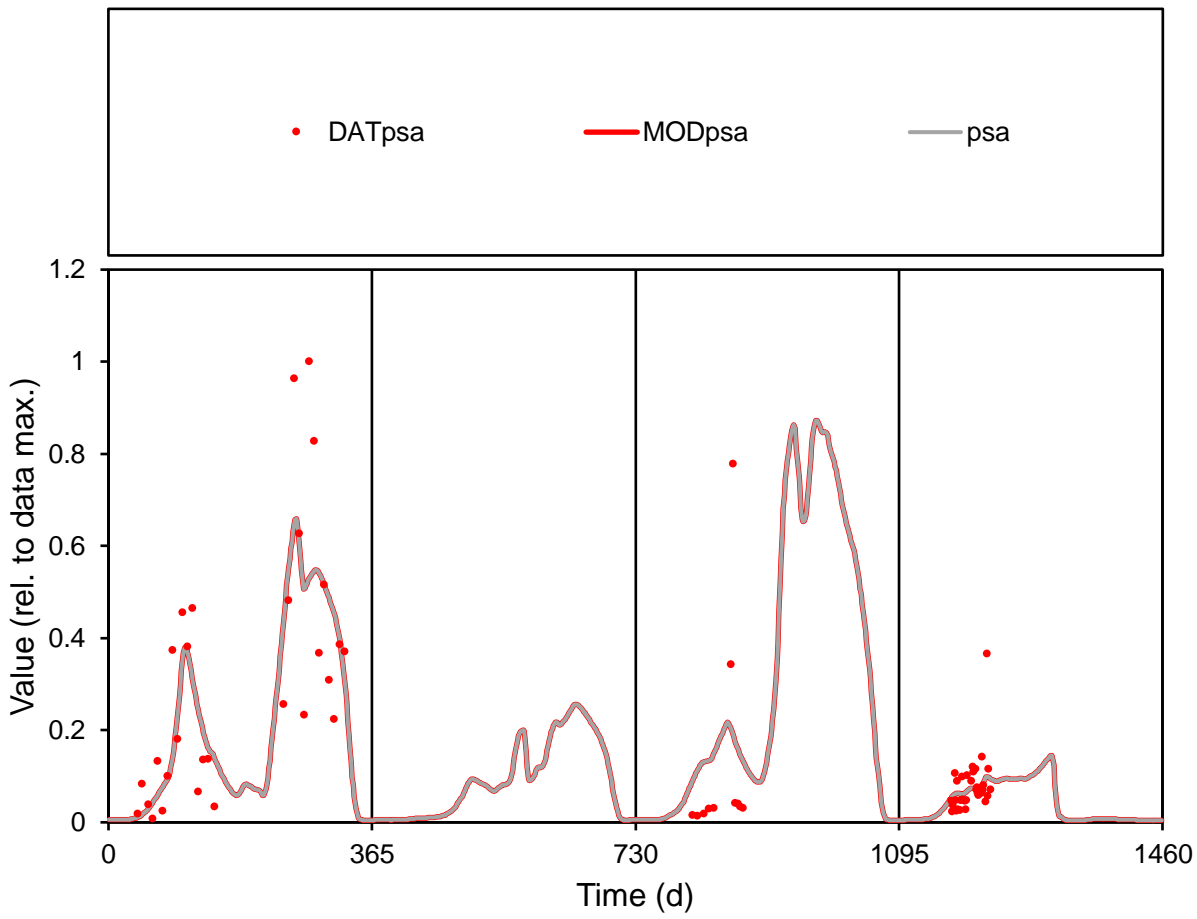

**Figure S1(36). Model - data comparison for observation: psa**

Normalized to max. value of data. Symbols are observations and lines are model. Red line corresponds to observations (e.g. Chlorophyll *a*), others are sub-components (e.g. individual phytoplankton species). See Tables S19 and S24 for observation and model component IDs, and mapping.

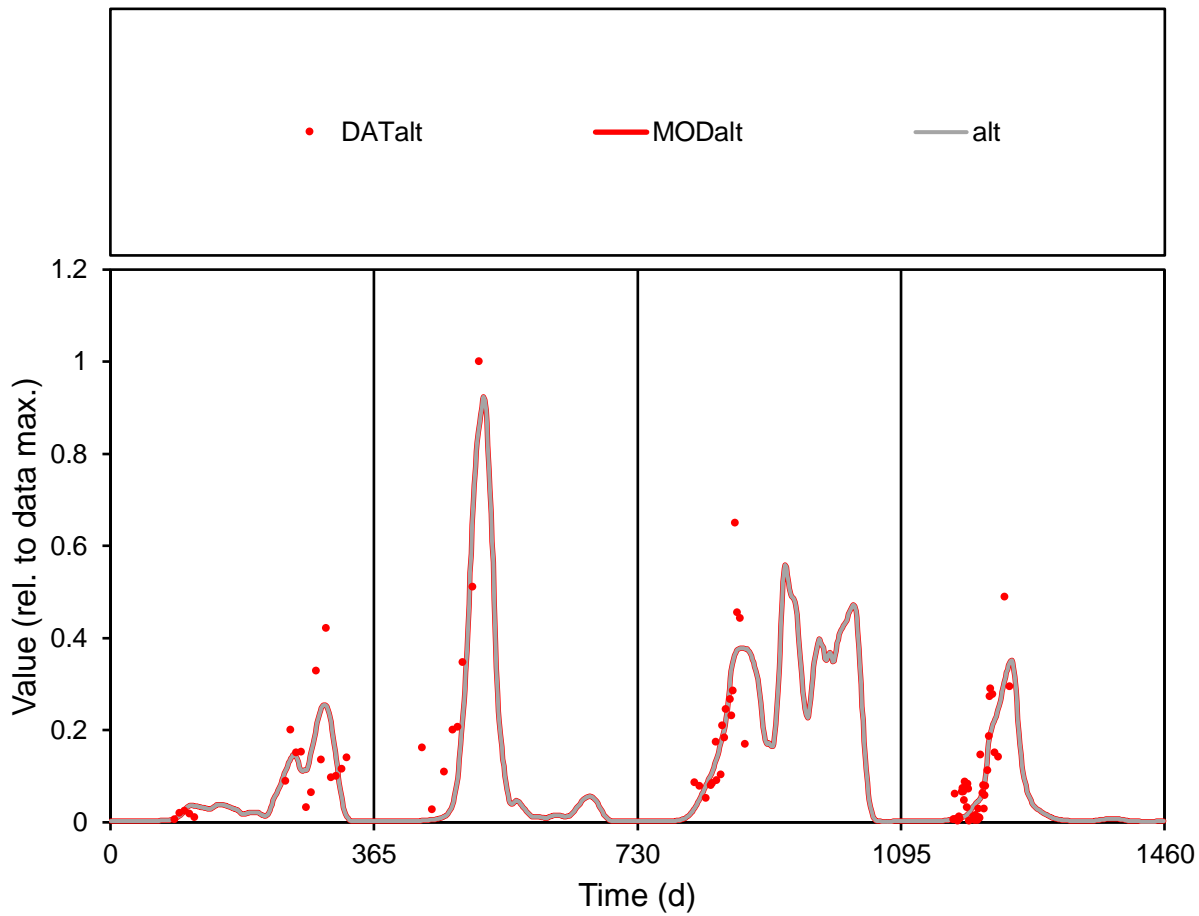

**Figure S1(37). Model - data comparison for observation: alt**

Normalized to max. value of data. Symbols are observations and lines are model. Red line corresponds to observations (e.g. Chlorophyll *a*), others are sub-components (e.g. individual phytoplankton species). See Tables S19 and S24 for observation and model component IDs, and mapping.

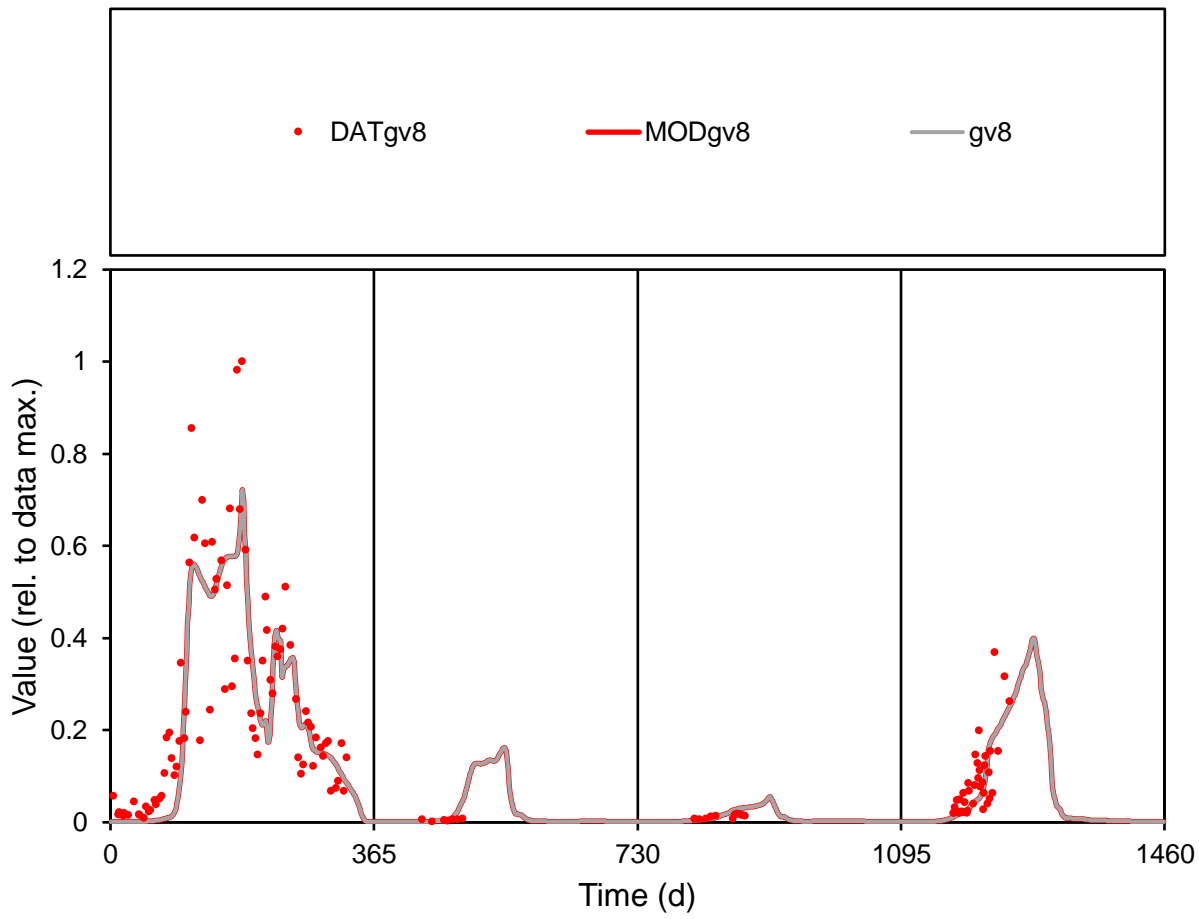

**Figure S1(38). Model - data comparison for observation: gv8**

Normalized to max. value of data. Symbols are observations and lines are model. Red line corresponds to observations (e.g. Chlorophyll *a*), others are sub-components (e.g. individual phytoplankton species). See Tables S19 and S24 for observation and model component IDs, and mapping.

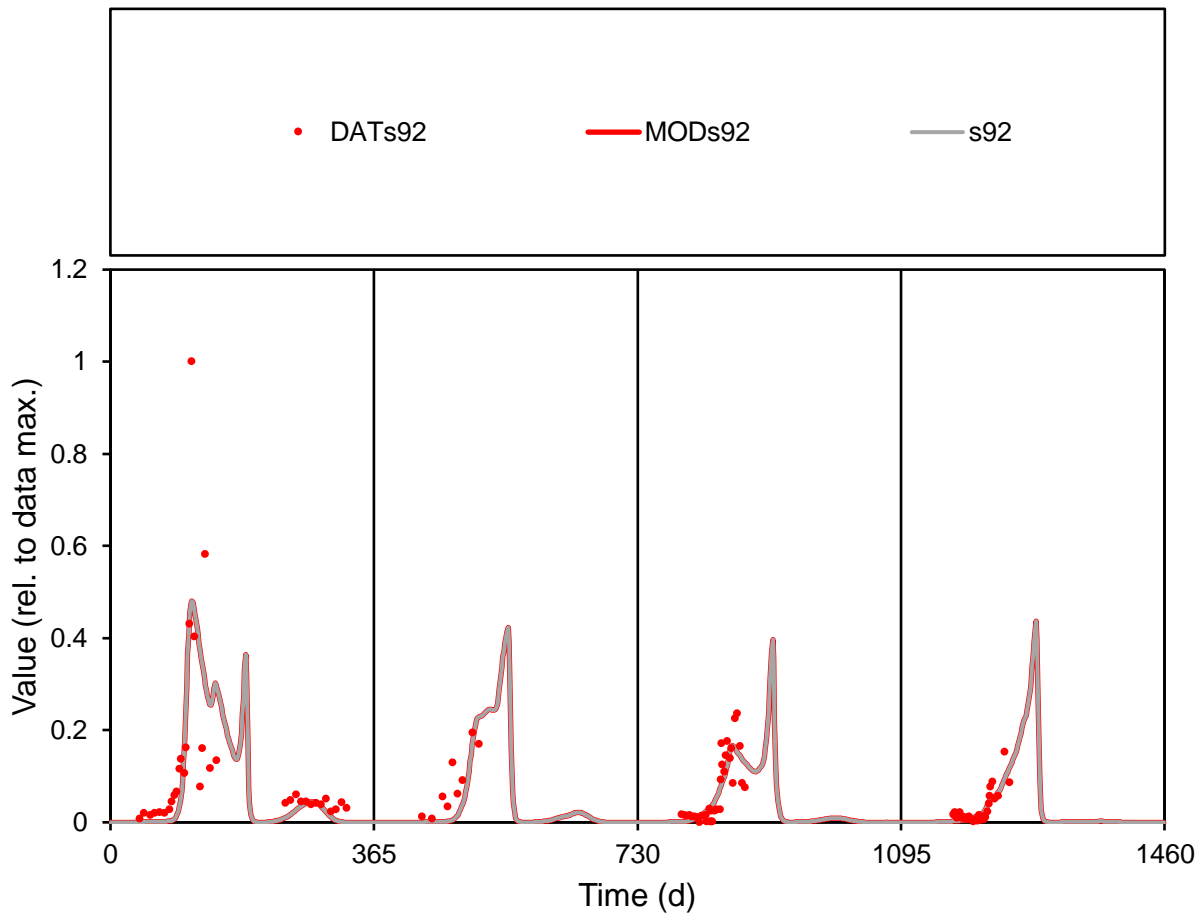

**Figure S1(39). Model - data comparison for observation: s92**

Normalized to max. value of data. Symbols are observations and lines are model. Red line corresponds to observations (e.g. Chlorophyll *a*), others are sub-components (e.g. individual phytoplankton species). See Tables S19 and S24 for observation and model component IDs, and mapping.

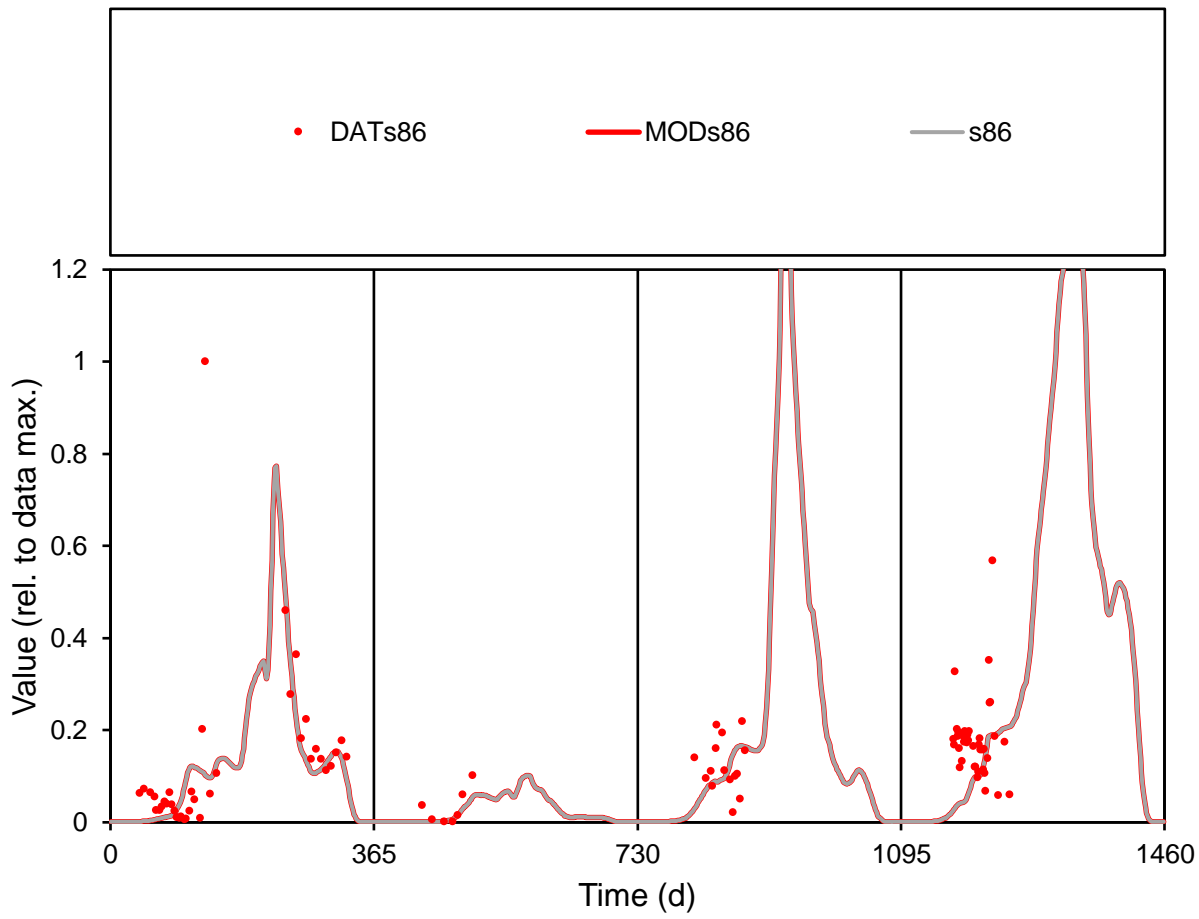

**Figure S1(40). Model - data comparison for observation: s86**

Normalized to max. value of data. Symbols are observations and lines are model. Red line corresponds to observations (e.g. Chlorophyll *a*), others are sub-components (e.g. individual phytoplankton species). See Tables S19 and S24 for observation and model component IDs, and mapping.



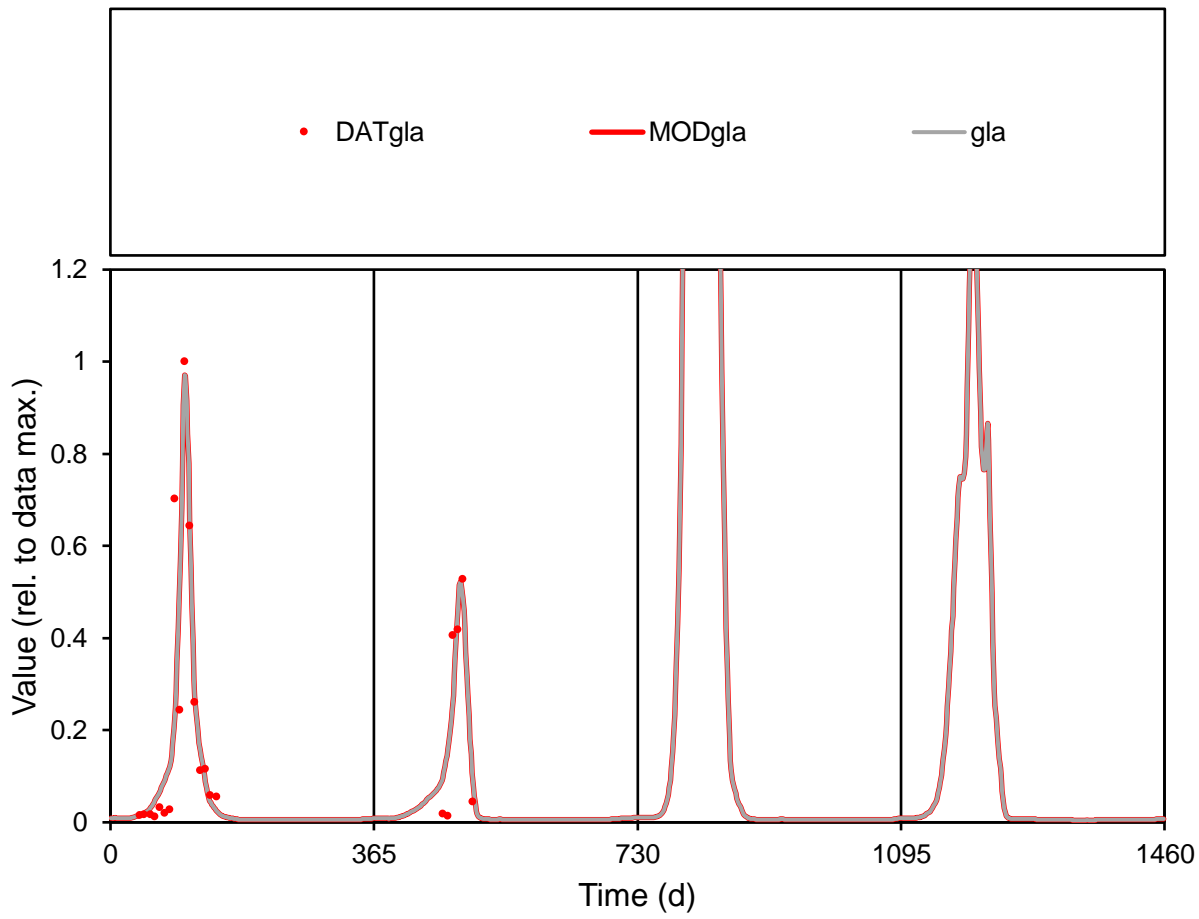

**Figure S1(41). Model - data comparison for observation: gla**

Normalized to max. value of data. Symbols are observations and lines are model. Red line corresponds to observations (e.g. Chlorophyll *a*), others are sub-components (e.g. individual phytoplankton species). See Tables S19 and S24 for observation and model component IDs, and mapping.

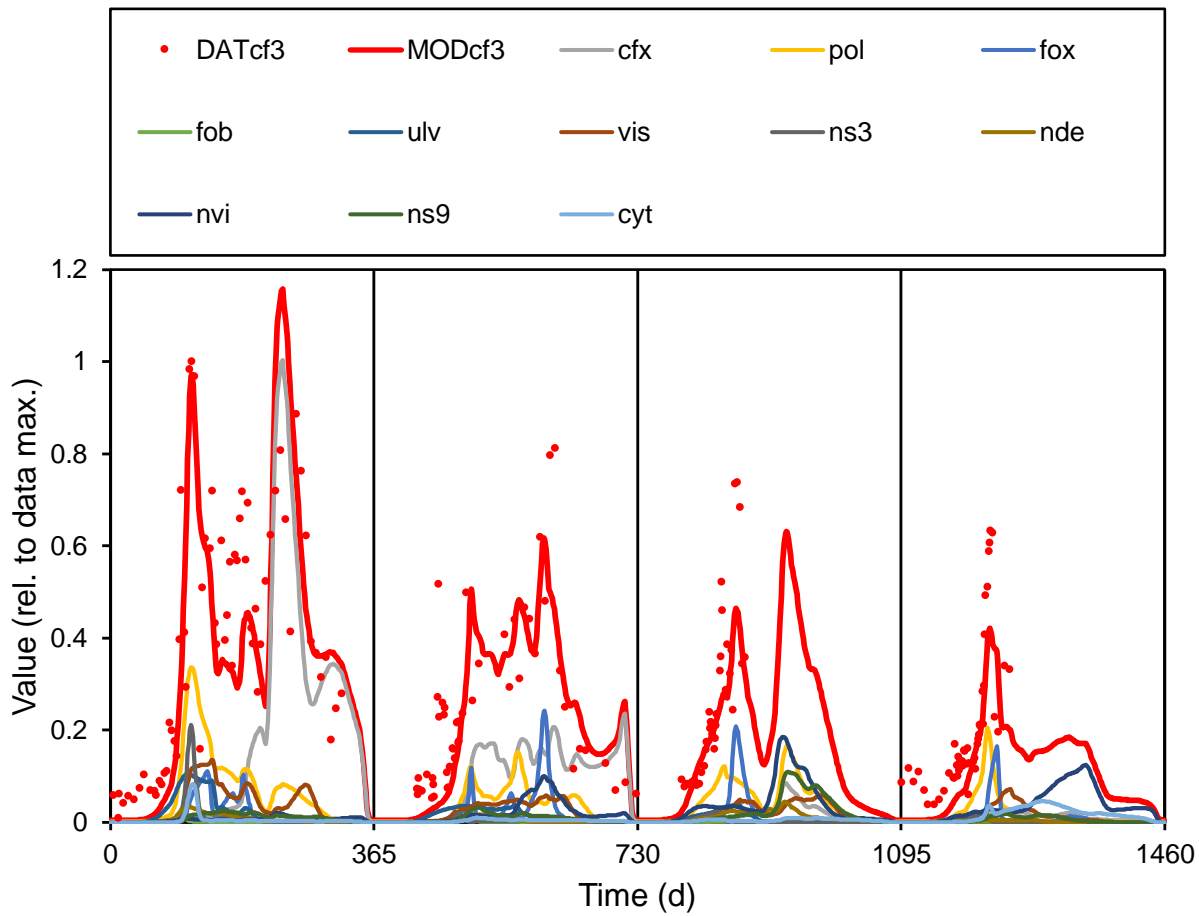

**Figure S1(42). Model - data comparison for observation: cf3**

Normalized to max. value of data. Symbols are observations and lines are model. Red line corresponds to observations (e.g. Chlorophyll *a*), others are sub-components (e.g. individual phytoplankton species). See Tables S19 and S24 for observation and model component IDs, and mapping.

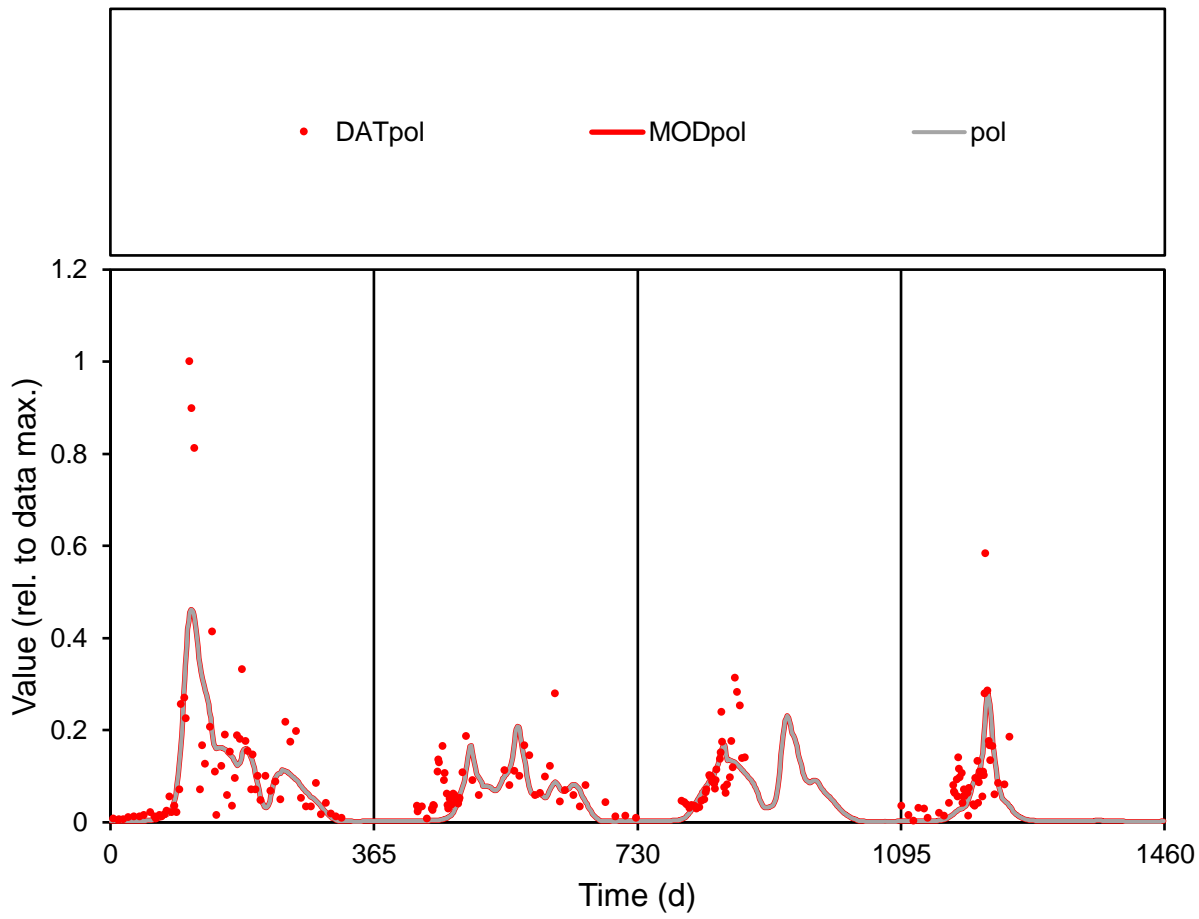

**Figure S1(43). Model - data comparison for observation: pol**

Normalized to max. value of data. Symbols are observations and lines are model. Red line corresponds to observations (e.g. Chlorophyll *a*), others are sub-components (e.g. individual phytoplankton species). See Tables S19 and S24 for observation and model component IDs, and mapping.

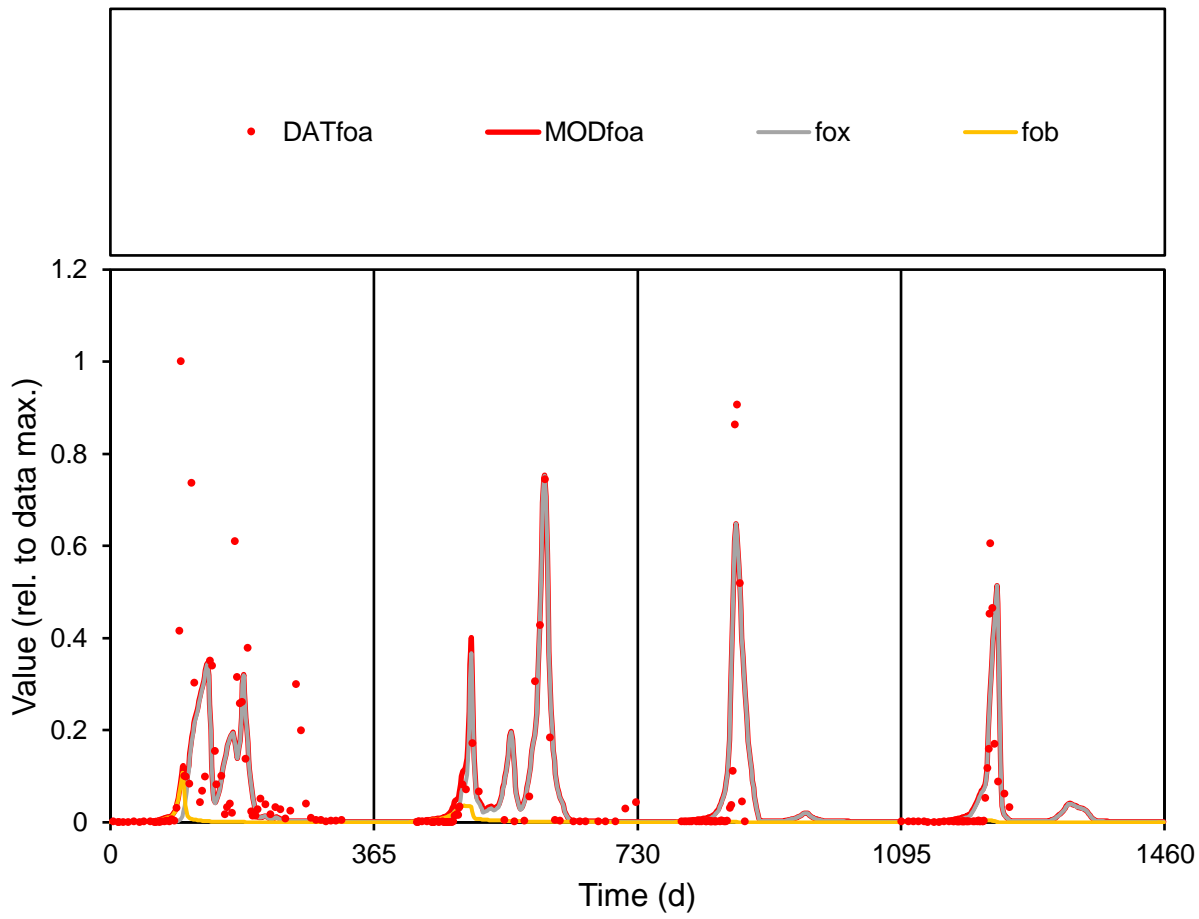

**Figure S1(44). Model - data comparison for observation: foa**

Normalized to max. value of data. Symbols are observations and lines are model. Red line corresponds to observations (e.g. Chlorophyll *a*), others are sub-components (e.g. individual phytoplankton species). See Tables S19 and S24 for observation and model component IDs, and mapping.

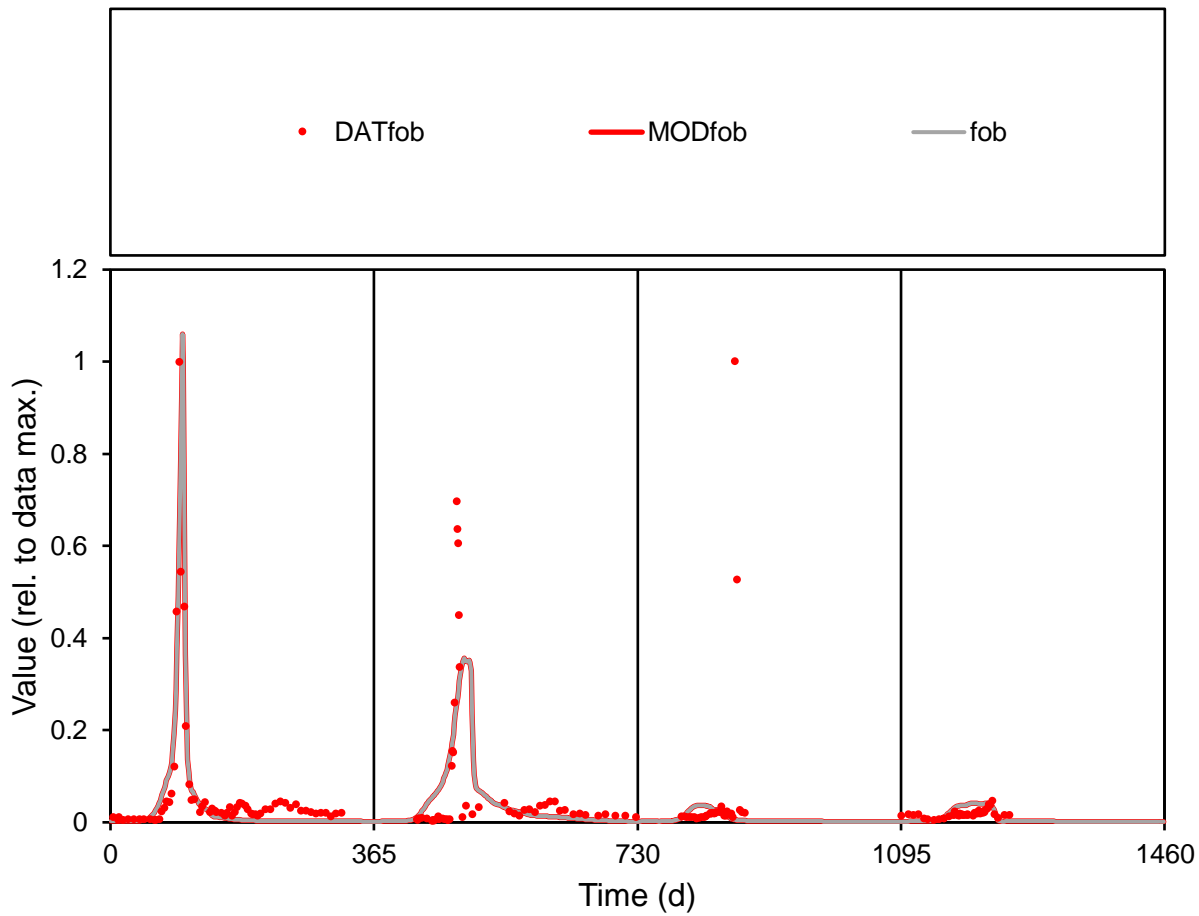

**Figure S1(45). Model - data comparison for observation: fob**

Normalized to max. value of data. Symbols are observations and lines are model. Red line corresponds to observations (e.g. Chlorophyll *a*), others are sub-components (e.g. individual phytoplankton species). See Tables S19 and S24 for observation and model component IDs, and mapping.

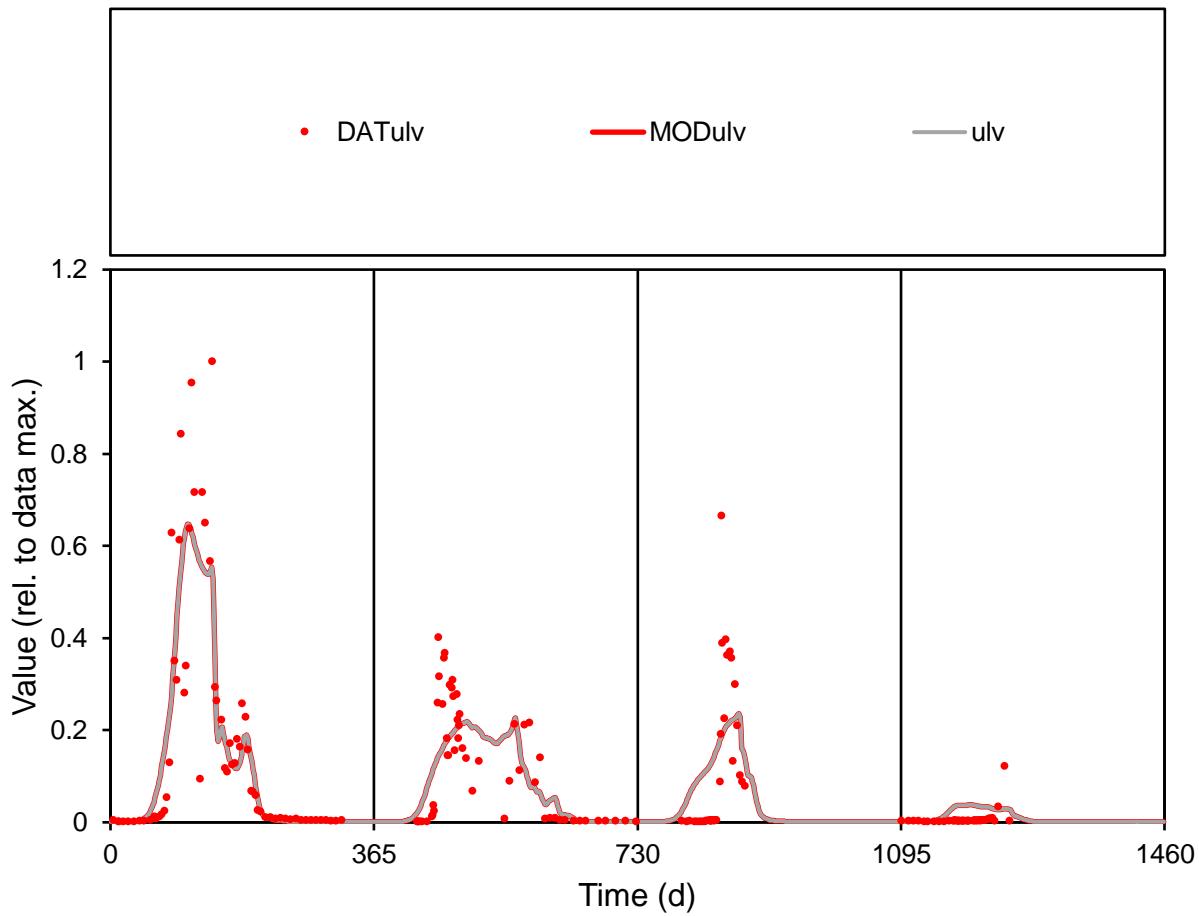

**Figure S1(46). Model - data comparison for observation: ulv**

Normalized to max. value of data. Symbols are observations and lines are model. Red line corresponds to observations (e.g. Chlorophyll *a*), others are sub-components (e.g. individual phytoplankton species). See Tables S19 and S24 for observation and model component IDs, and mapping.

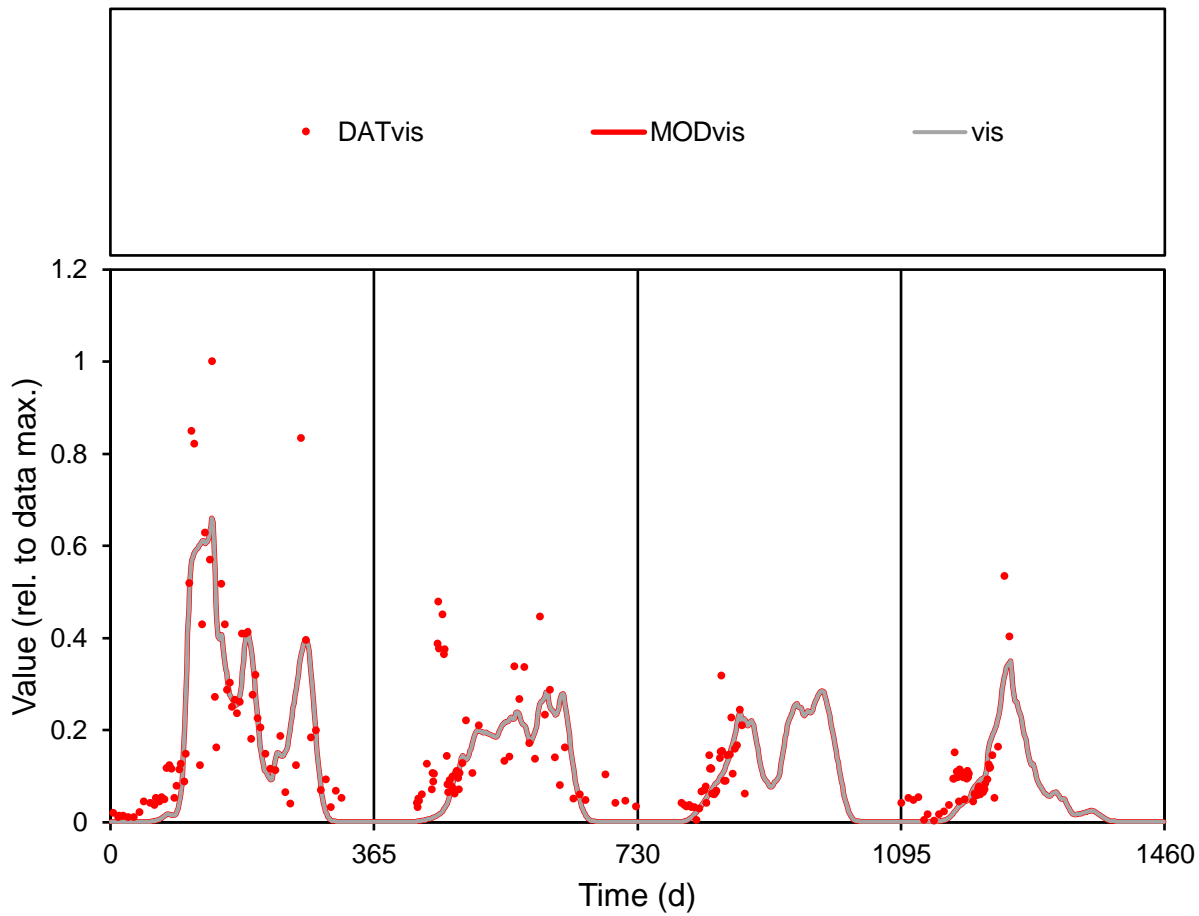

**Figure S1(47). Model - data comparison for observation: vis**

Normalized to max. value of data. Symbols are observations and lines are model. Red line corresponds to observations (e.g. Chlorophyll *a*), others are sub-components (e.g. individual phytoplankton species). See Tables S19 and S24 for observation and model component IDs, and mapping.

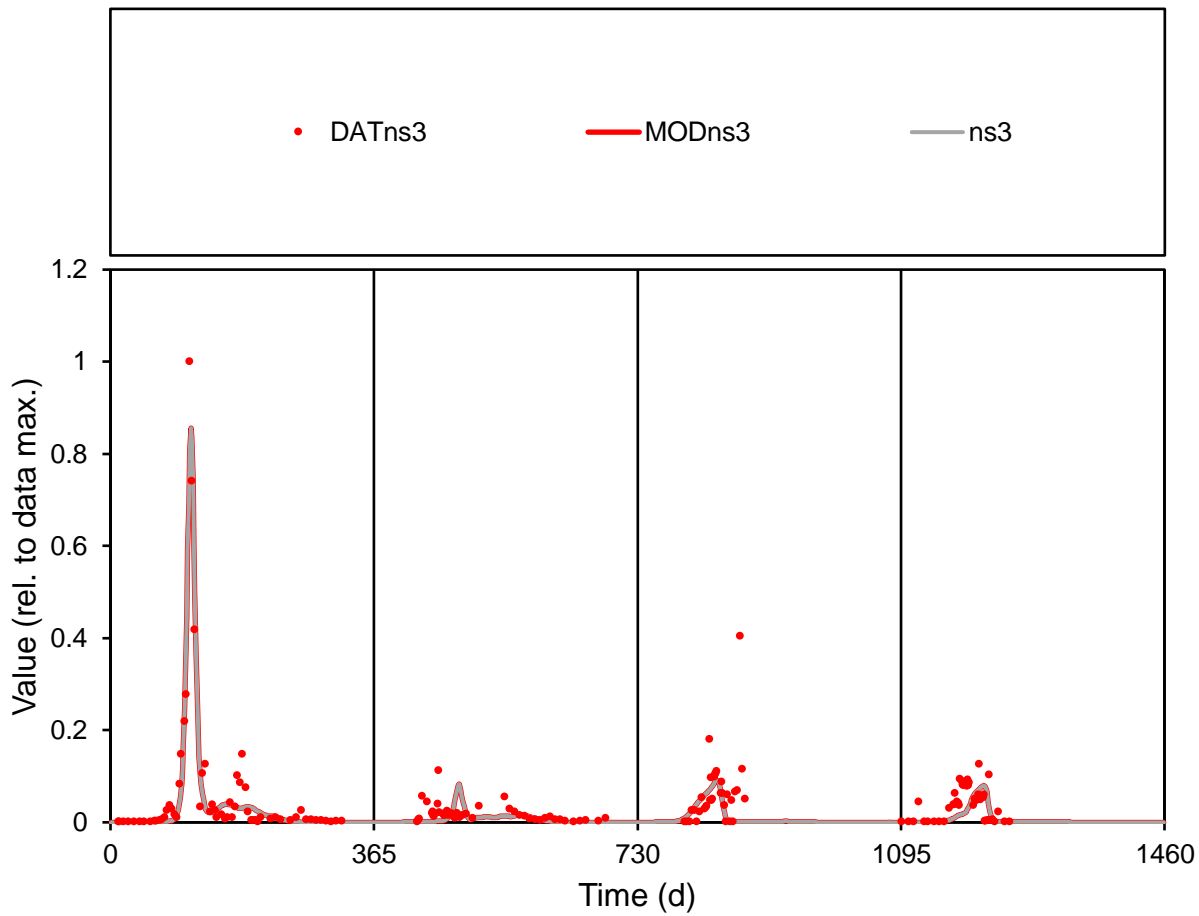

**Figure S1(48). Model - data comparison for observation: ns3**

Normalized to max. value of data. Symbols are observations and lines are model. Red line corresponds to observations (e.g. Chlorophyll *a*), others are sub-components (e.g. individual phytoplankton species). See Tables S19 and S24 for observation and model component IDs, and mapping.



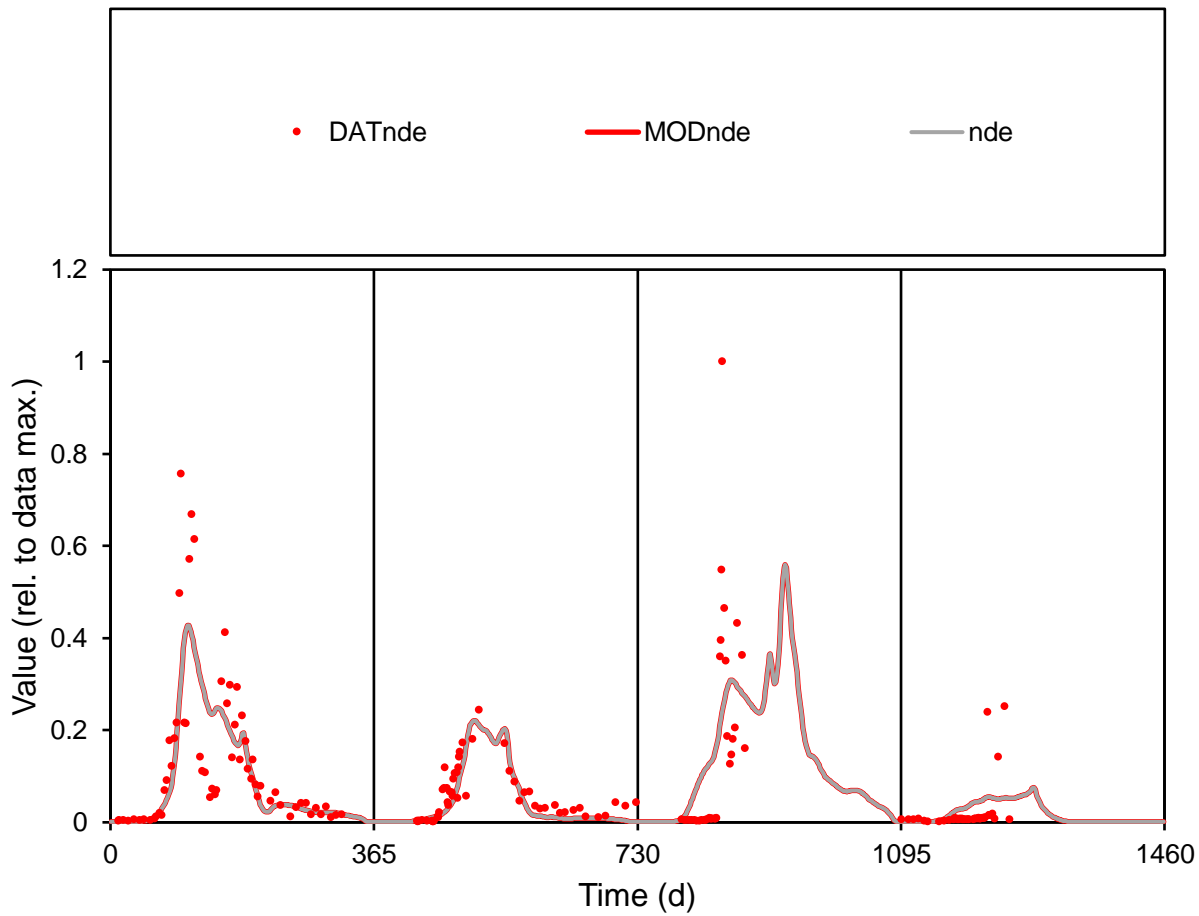

**Figure S1(49). Model - data comparison for observation: nde**

Normalized to max. value of data. Symbols are observations and lines are model. Red line corresponds to observations (e.g. Chlorophyll *a*), others are sub-components (e.g. individual phytoplankton species). See Tables S19 and S24 for observation and model component IDs, and mapping.

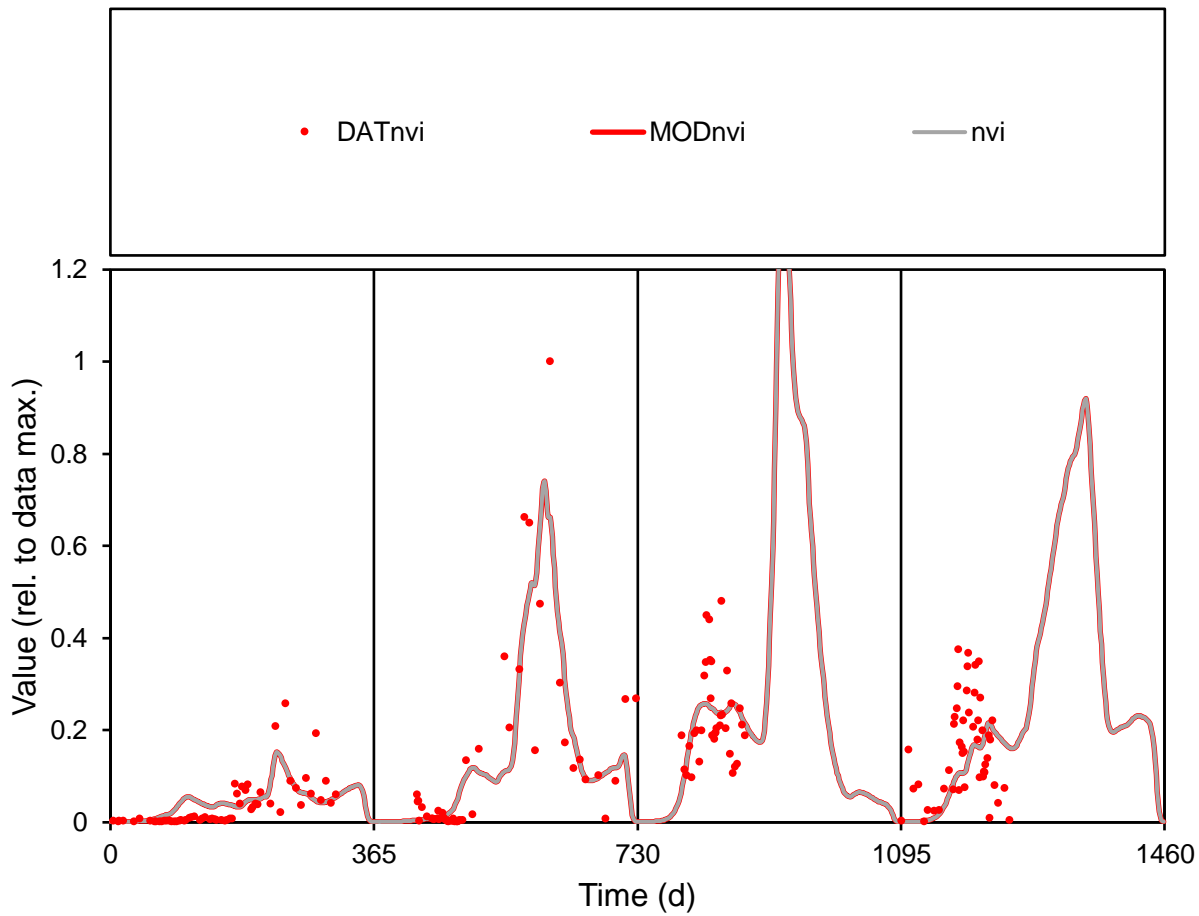

**Figure S1(50). Model - data comparison for observation: nvi**

Normalized to max. value of data. Symbols are observations and lines are model. Red line corresponds to observations (e.g. Chlorophyll *a*), others are sub-components (e.g. individual phytoplankton species). See Tables S19 and S24 for observation and model component IDs, and mapping.

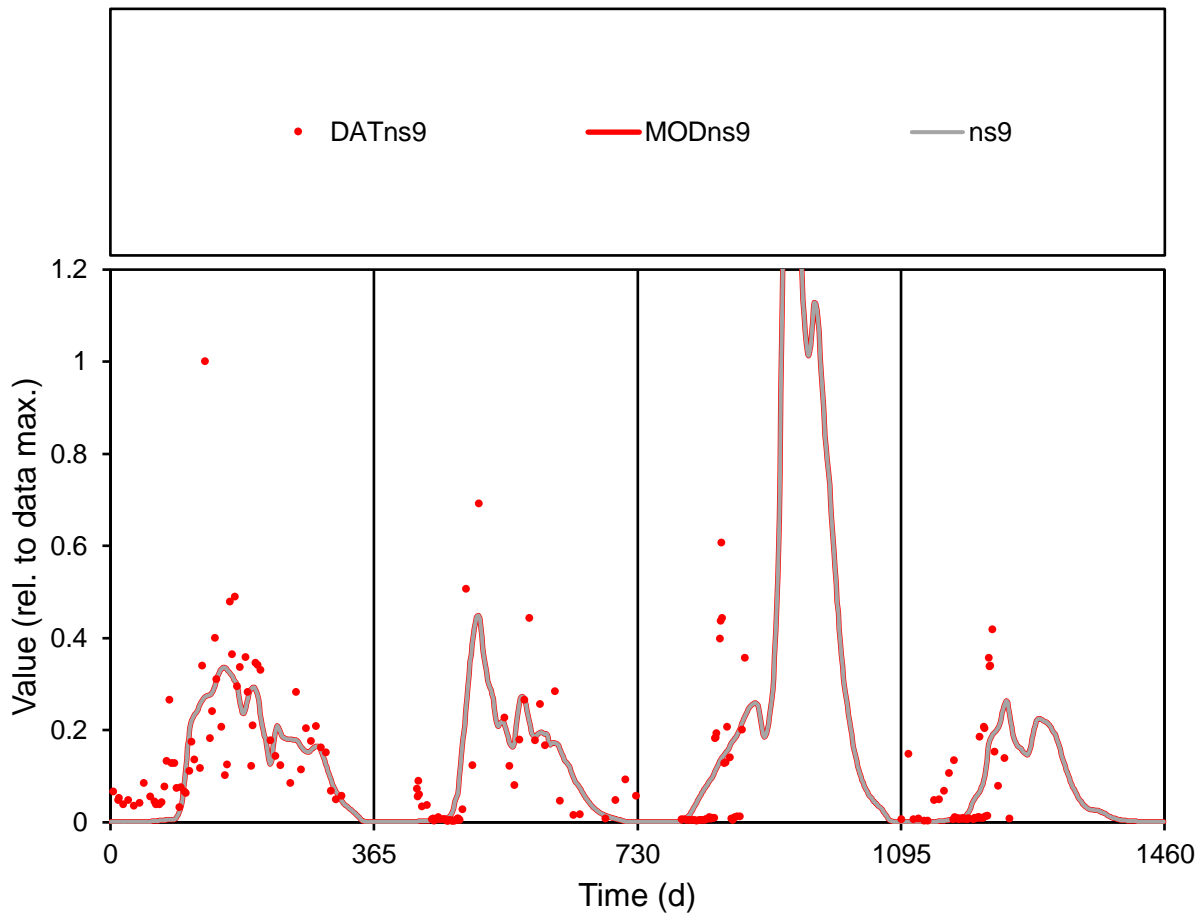

**Figure S1(51). Model - data comparison for observation: ns9**

Normalized to max. value of data. Symbols are observations and lines are model. Red line corresponds to observations (e.g. Chlorophyll *a*), others are sub-components (e.g. individual phytoplankton species). See Tables S19 and S24 for observation and model component IDs, and mapping.

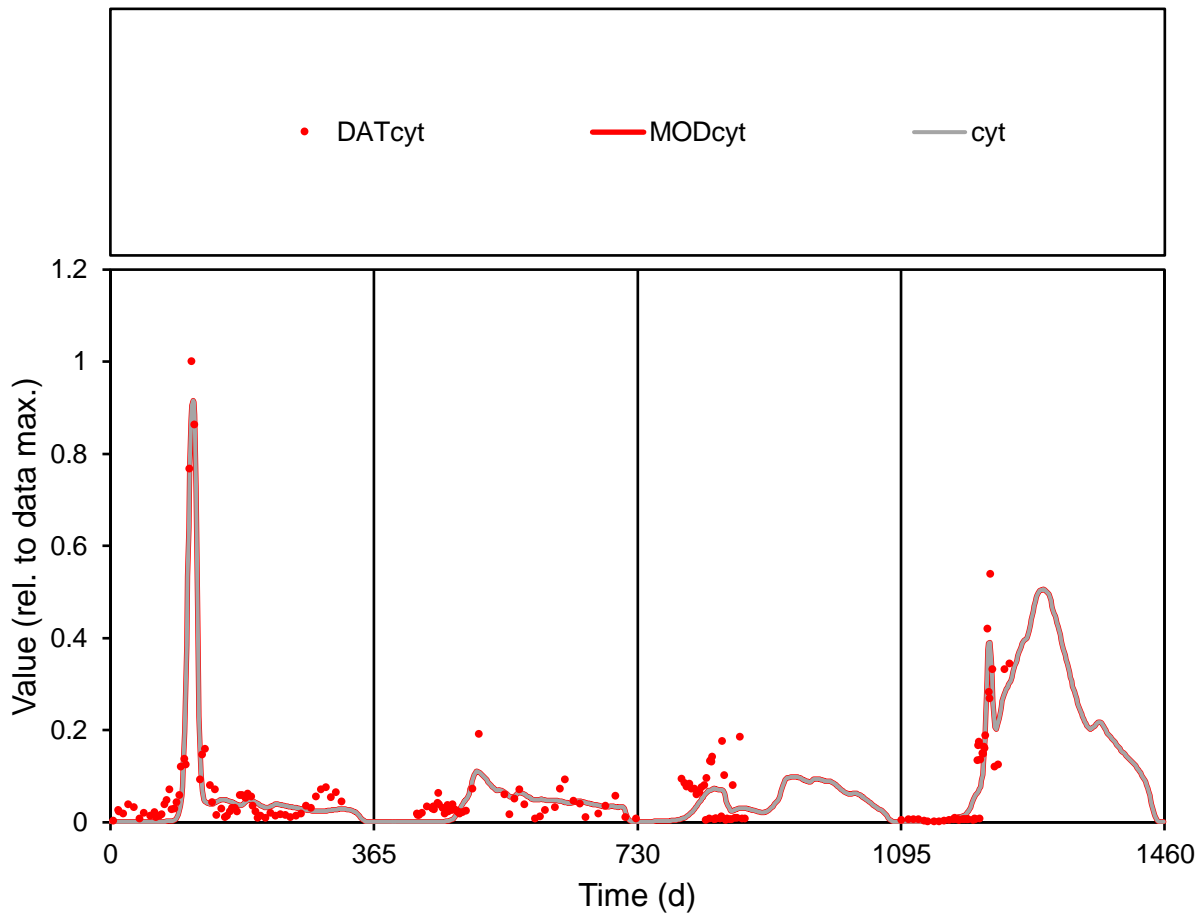

**Figure S1(52). Model - data comparison for observation: cyt**

Normalized to max. value of data. Symbols are observations and lines are model. Red line corresponds to observations (e.g. Chlorophyll *a*), others are sub-components (e.g. individual phytoplankton species). See Tables S19 and S24 for observation and model component IDs, and mapping.

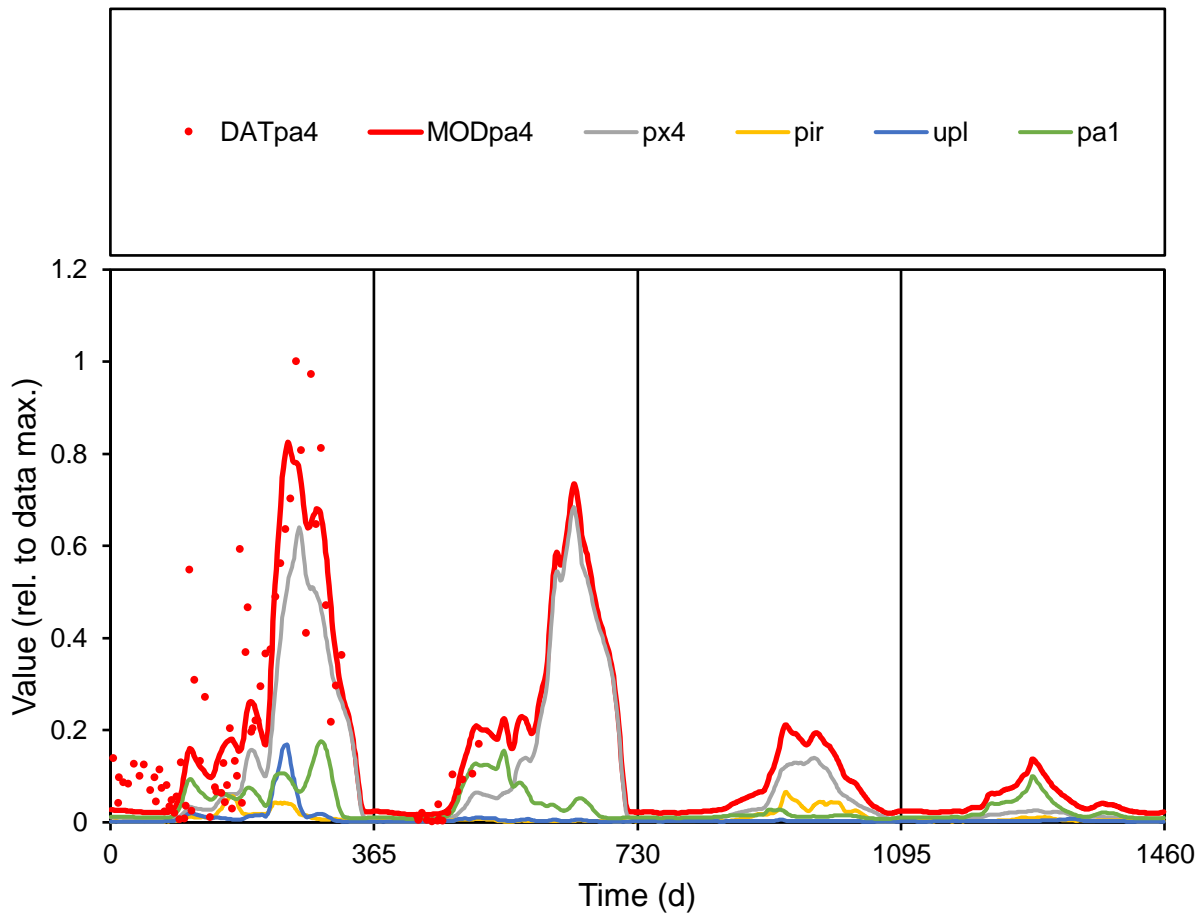

**Figure S1(53). Model - data comparison for observation: pa4**

Normalized to max. value of data. Symbols are observations and lines are model. Red line corresponds to observations (e.g. Chlorophyll *a*), others are sub-components (e.g. individual phytoplankton species). See Tables S19 and S24 for observation and model component IDs, and mapping.

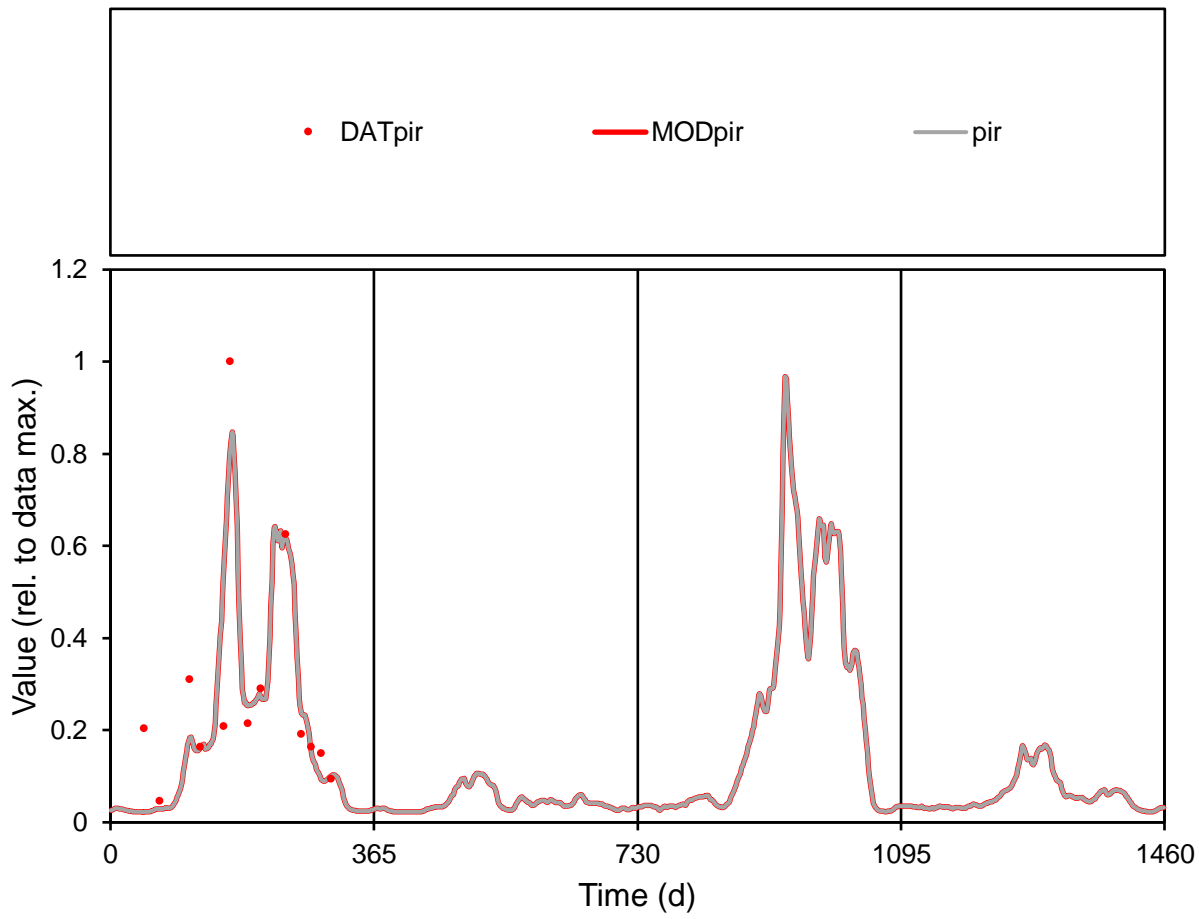

**Figure S1(54). Model - data comparison for observation: pir**

Normalized to max. value of data. Symbols are observations and lines are model. Red line corresponds to observations (e.g. Chlorophyll *a*), others are sub-components (e.g. individual phytoplankton species). See Tables S19 and S24 for observation and model component IDs, and mapping.

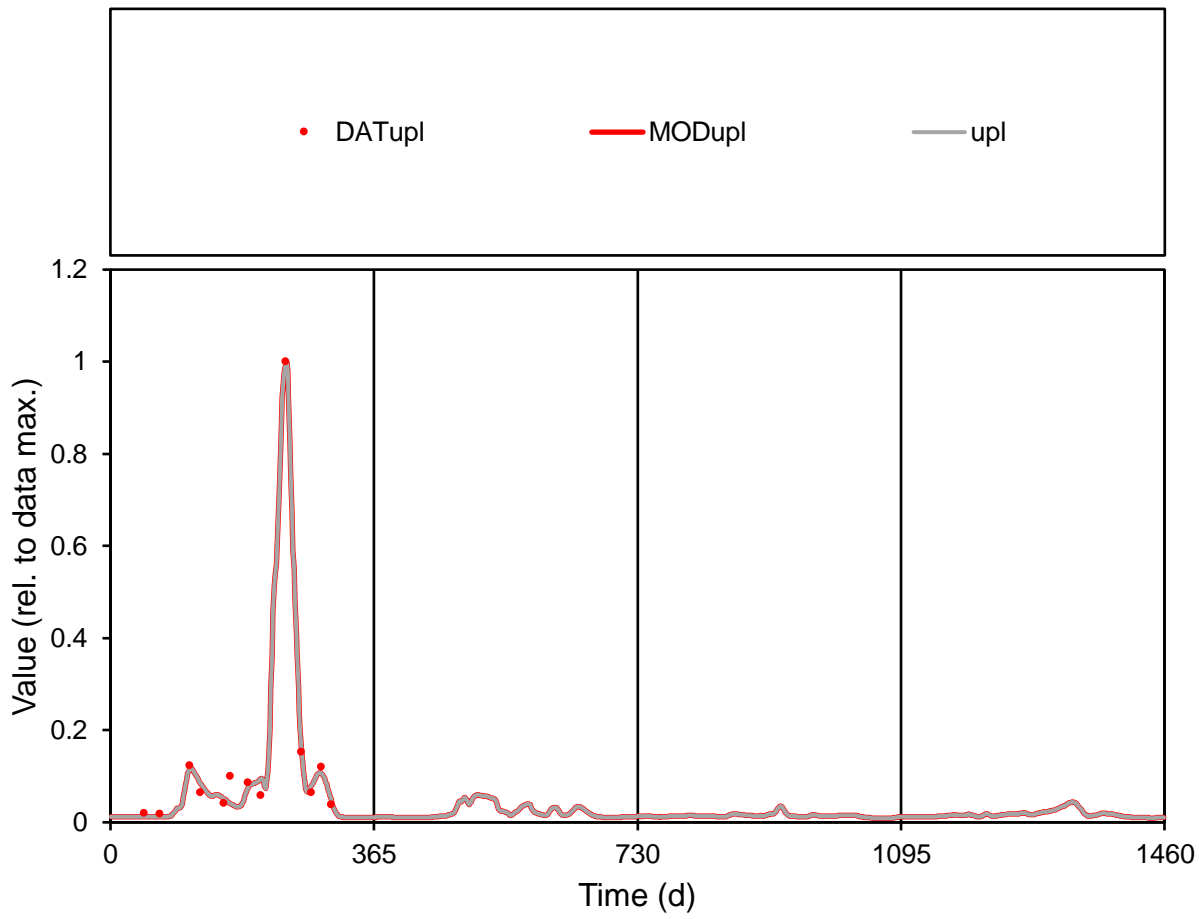

**Figure S1(55). Model - data comparison for observation: upl**

Normalized to max. value of data. Symbols are observations and lines are model. Red line corresponds to observations (e.g. Chlorophyll *a*), others are sub-components (e.g. individual phytoplankton species). See Tables S19 and S24 for observation and model component IDs, and mapping.

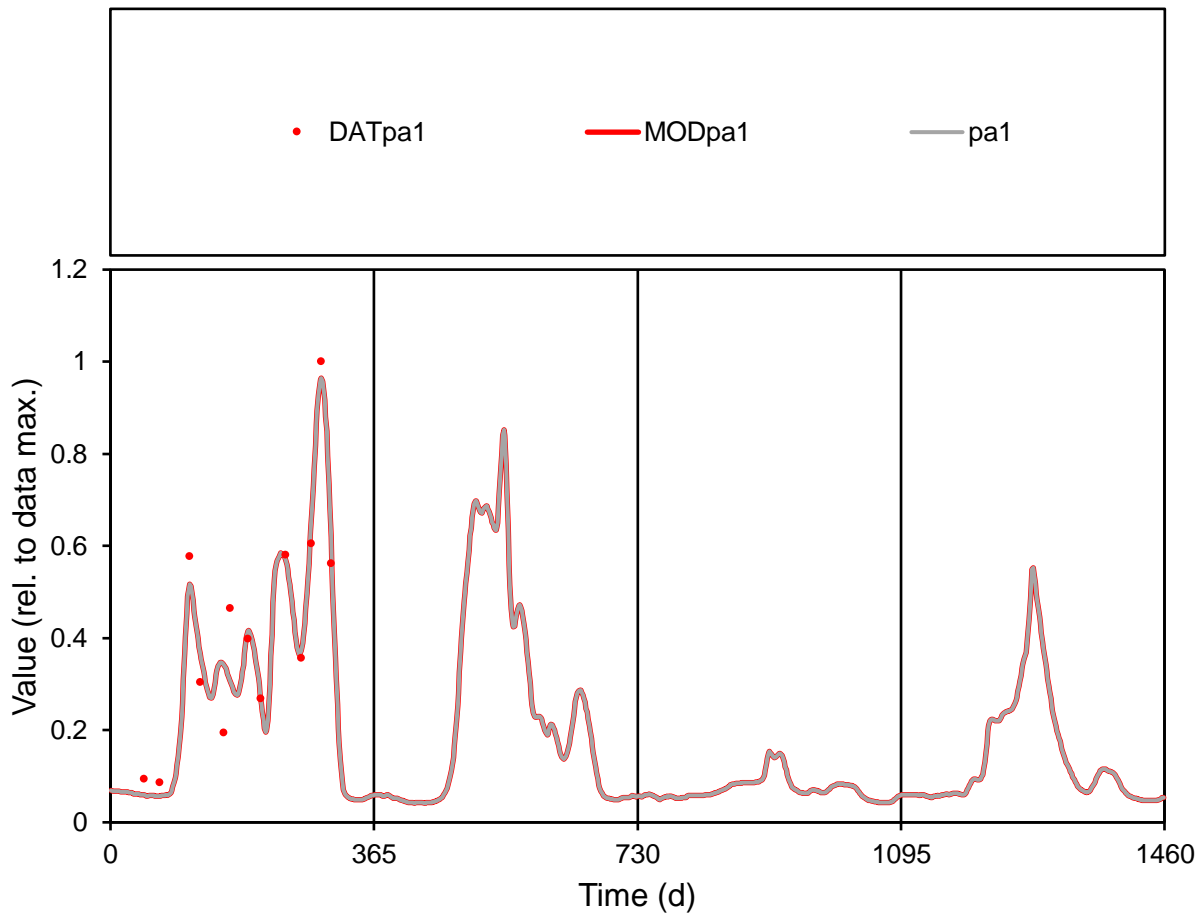

**Figure S1(56). Model - data comparison for observation: pa1**

Normalized to max. value of data. Symbols are observations and lines are model. Red line corresponds to observations (e.g. Chlorophyll *a*), others are sub-components (e.g. individual phytoplankton species). See Tables S19 and S24 for observation and model component IDs, and mapping.



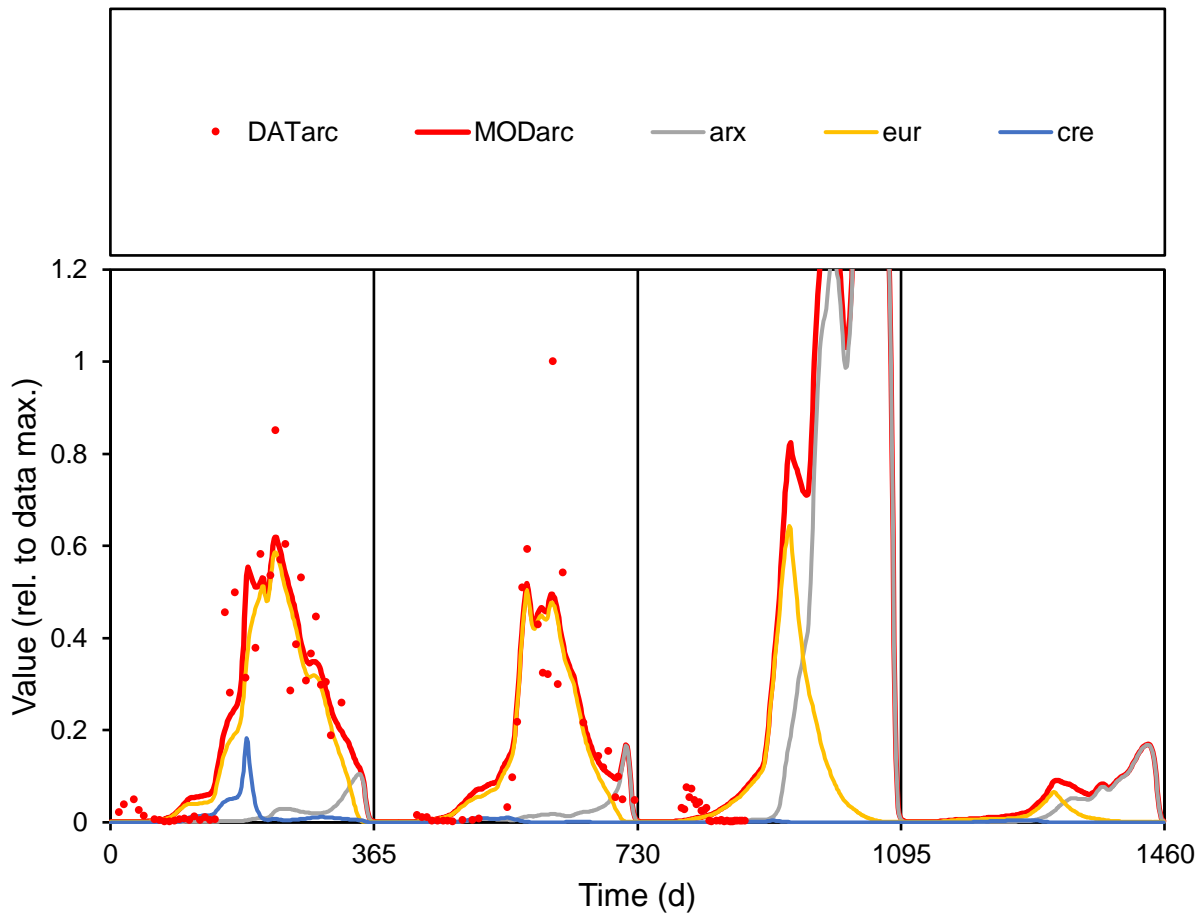

**Figure S1(57). Model - data comparison for observation: arc**

Normalized to max. value of data. Symbols are observations and lines are model. Red line corresponds to observations (e.g. Chlorophyll *a*), others are sub-components (e.g. individual phytoplankton species). See Tables S19 and S24 for observation and model component IDs, and mapping.

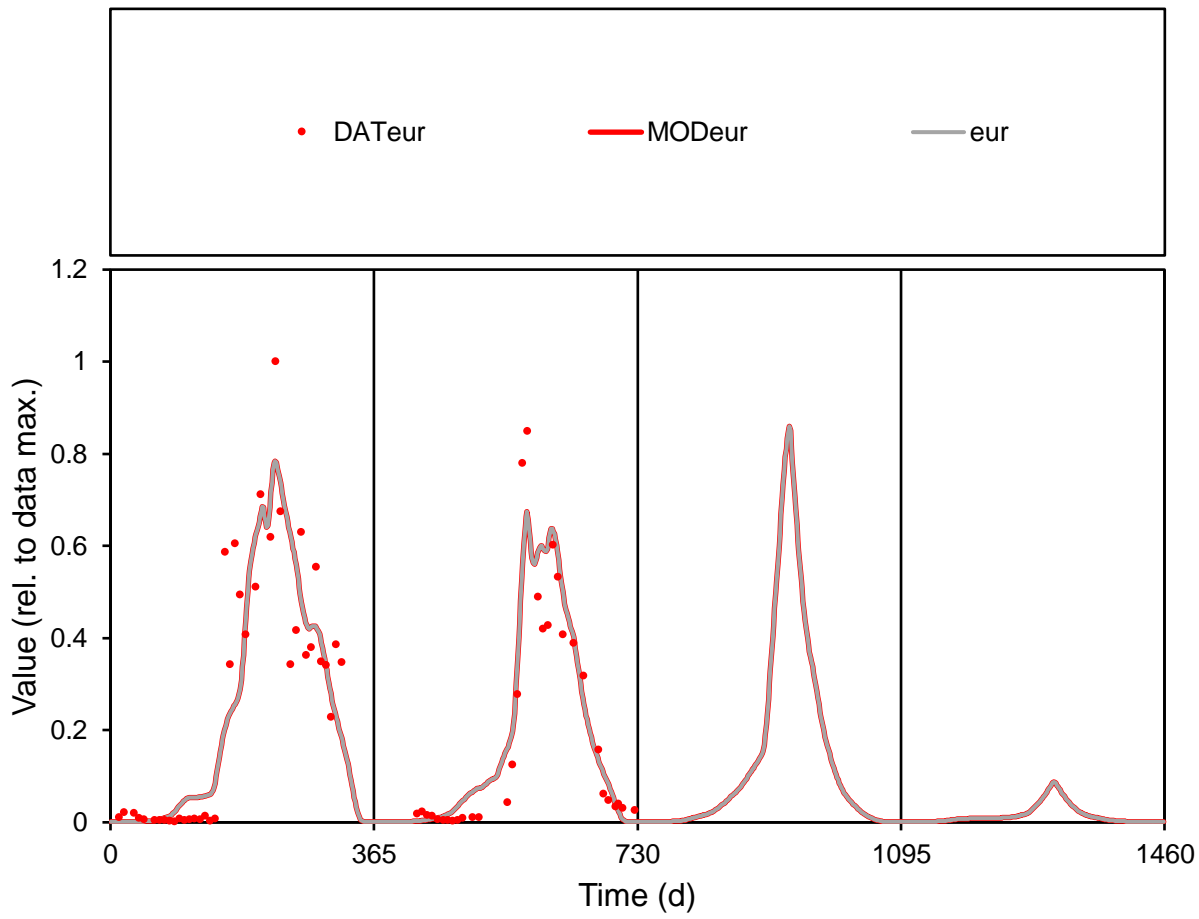

**Figure S1(58). Model - data comparison for observation: eur**

Normalized to max. value of data. Symbols are observations and lines are model. Red line corresponds to observations (e.g. Chlorophyll *a*), others are sub-components (e.g. individual phytoplankton species). See Tables S19 and S24 for observation and model component IDs, and mapping.

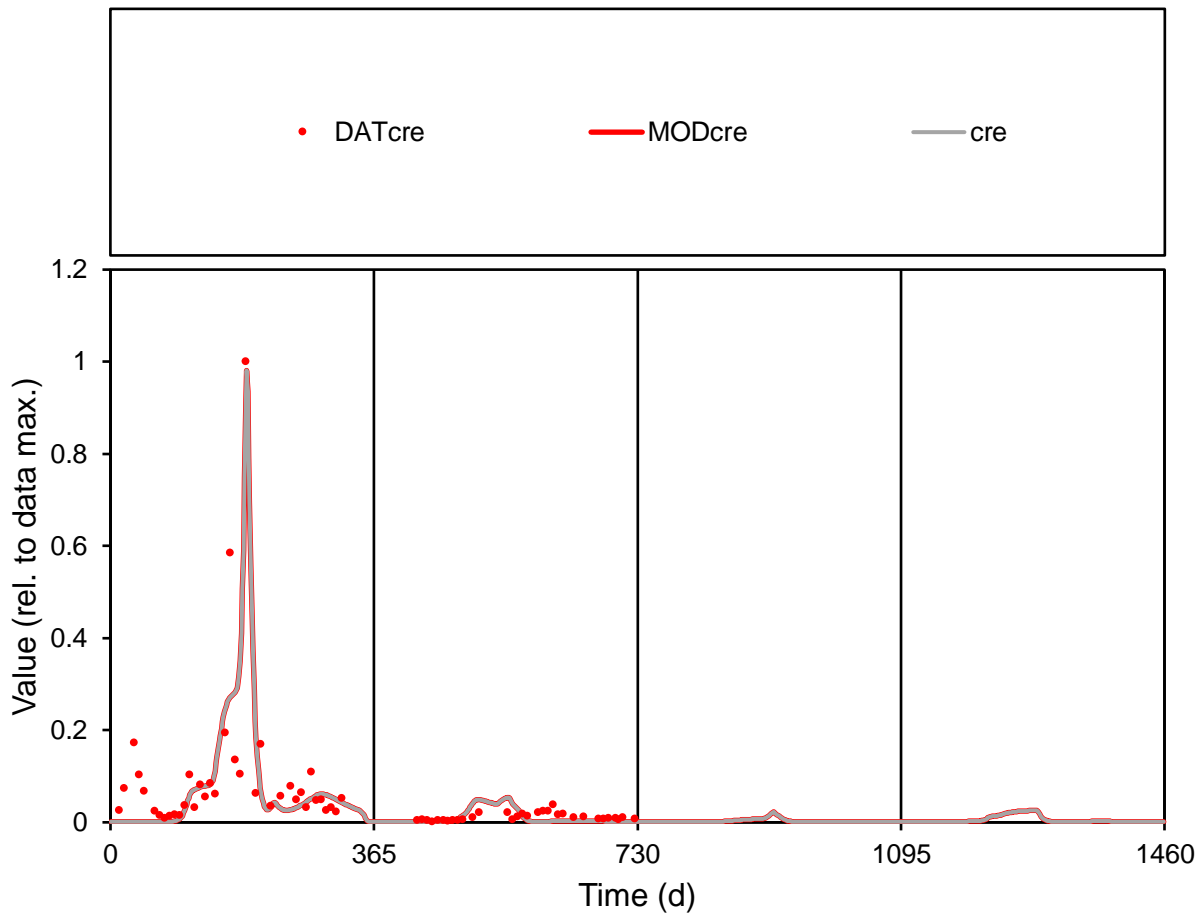

**Figure S1(59). Model - data comparison for observation: cre**

Normalized to max. value of data. Symbols are observations and lines are model. Red line corresponds to observations (e.g. Chlorophyll *a*), others are sub-components (e.g. individual phytoplankton species). See Tables S19 and S24 for observation and model component IDs, and mapping.

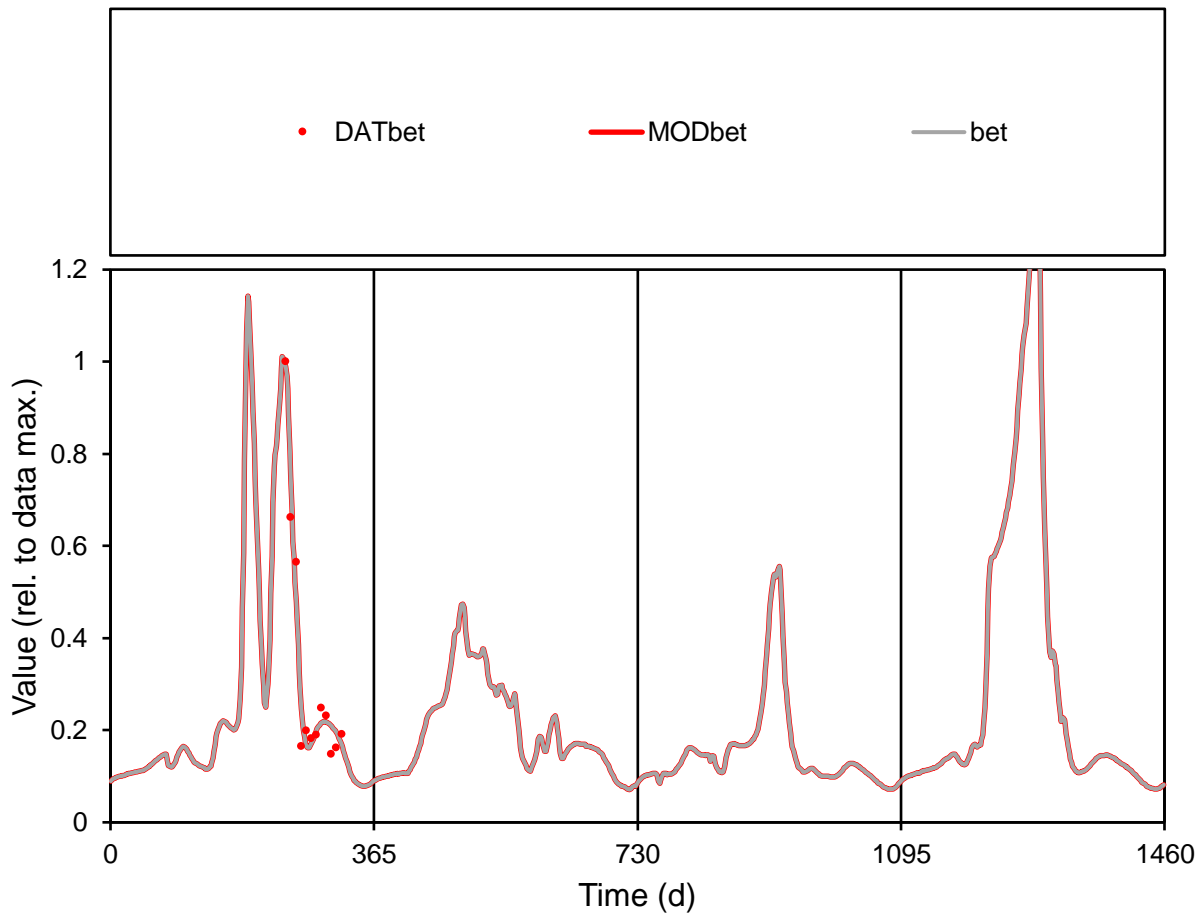

**Figure S1(60). Model - data comparison for observation: bet**

Normalized to max. value of data. Symbols are observations and lines are model. Red line corresponds to observations (e.g. Chlorophyll *a*), others are sub-components (e.g. individual phytoplankton species). See Tables S19 and S24 for observation and model component IDs, and mapping.

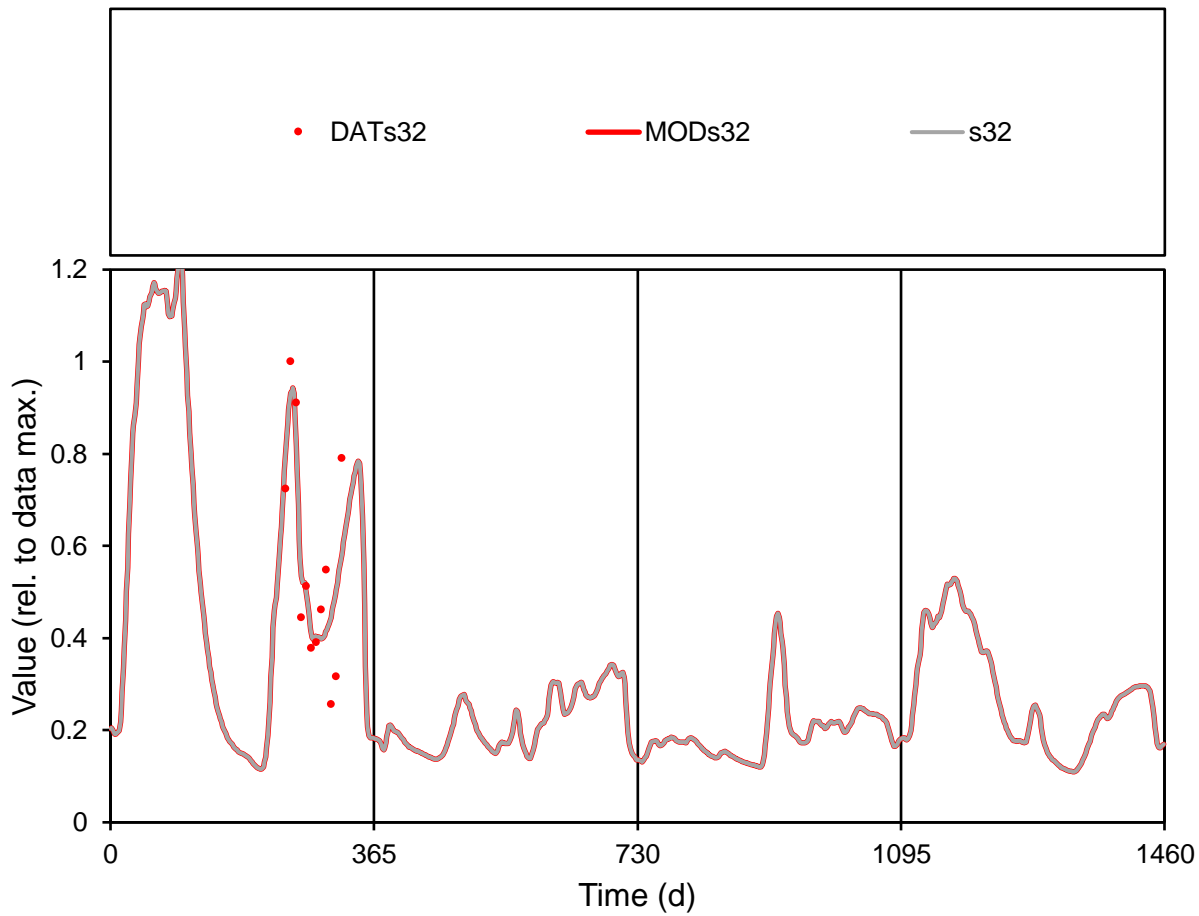

**Figure S1(61). Model - data comparison for observation: s32**

Normalized to max. value of data. Symbols are observations and lines are model. Red line corresponds to observations (e.g. Chlorophyll *a*), others are sub-components (e.g. individual phytoplankton species). See Tables S19 and S24 for observation and model component IDs, and mapping.

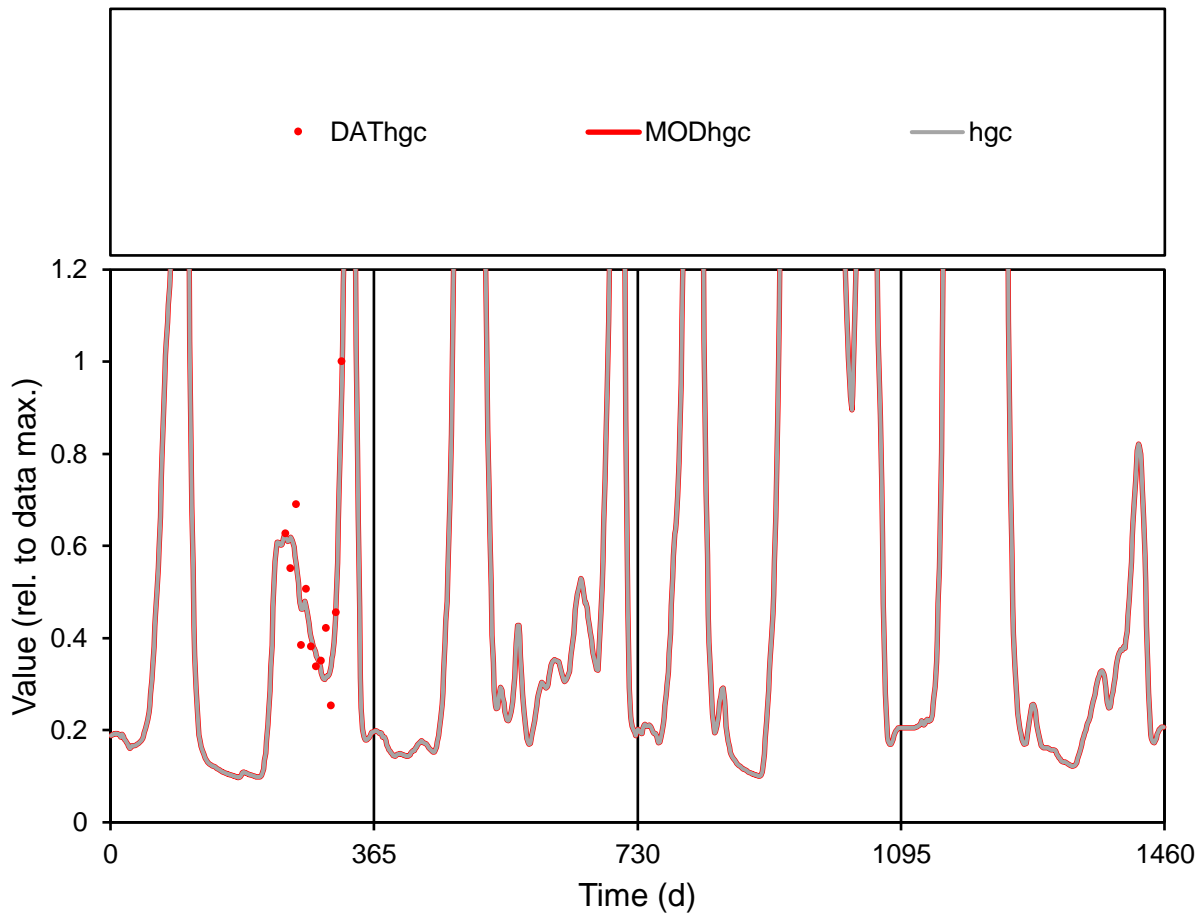

**Figure S1(62). Model - data comparison for observation: hgc**

Normalized to max. value of data. Symbols are observations and lines are model. Red line corresponds to observations (e.g. Chlorophyll *a*), others are sub-components (e.g. individual phytoplankton species). See Tables S19 and S24 for observation and model component IDs, and mapping.

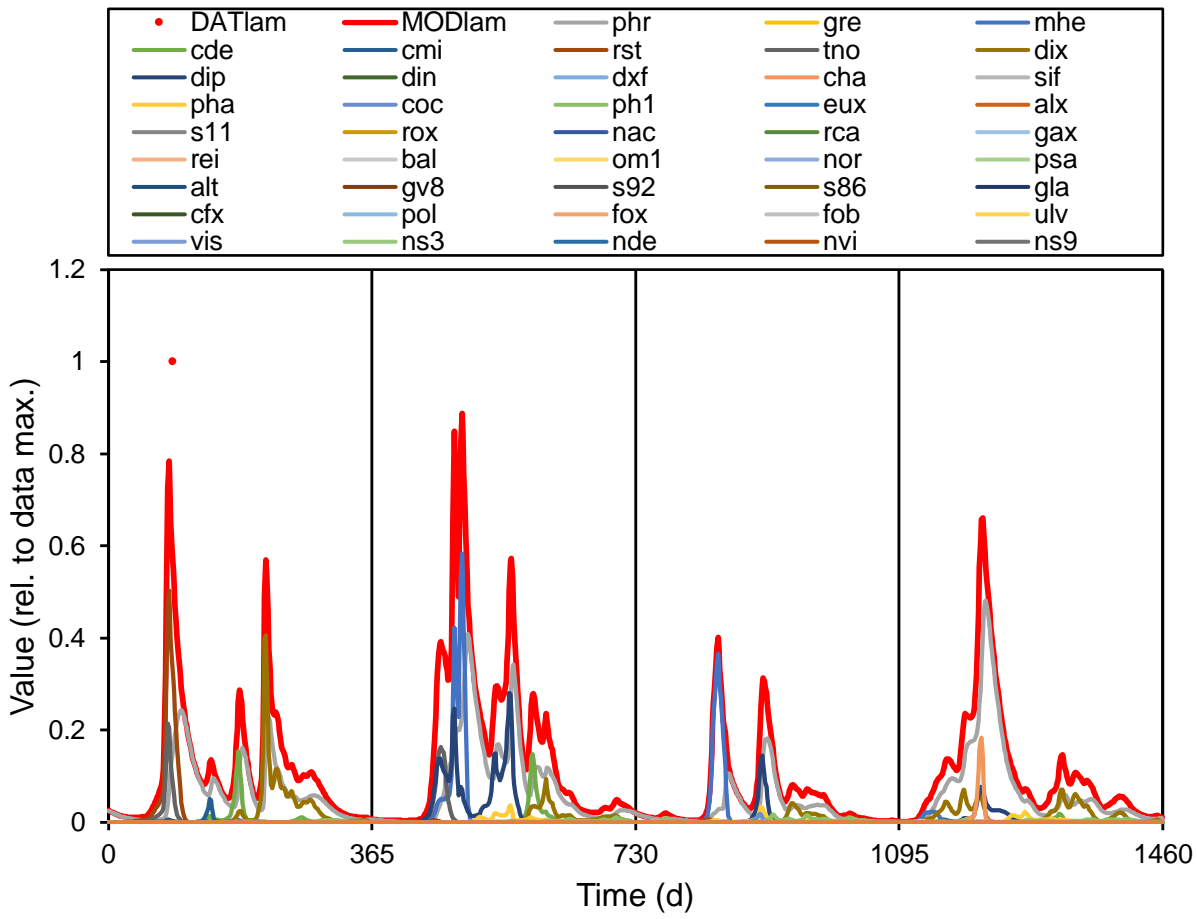

**Figure S1(63). Model - data comparison for observation: lam**

Normalized to max. value of data. Symbols are observations and lines are model. Red line corresponds to observations (e.g. Chlorophyll *a*), others are sub-components (e.g. individual phytoplankton species). See Tables S19 and S24 for observation and model component IDs, and mapping.

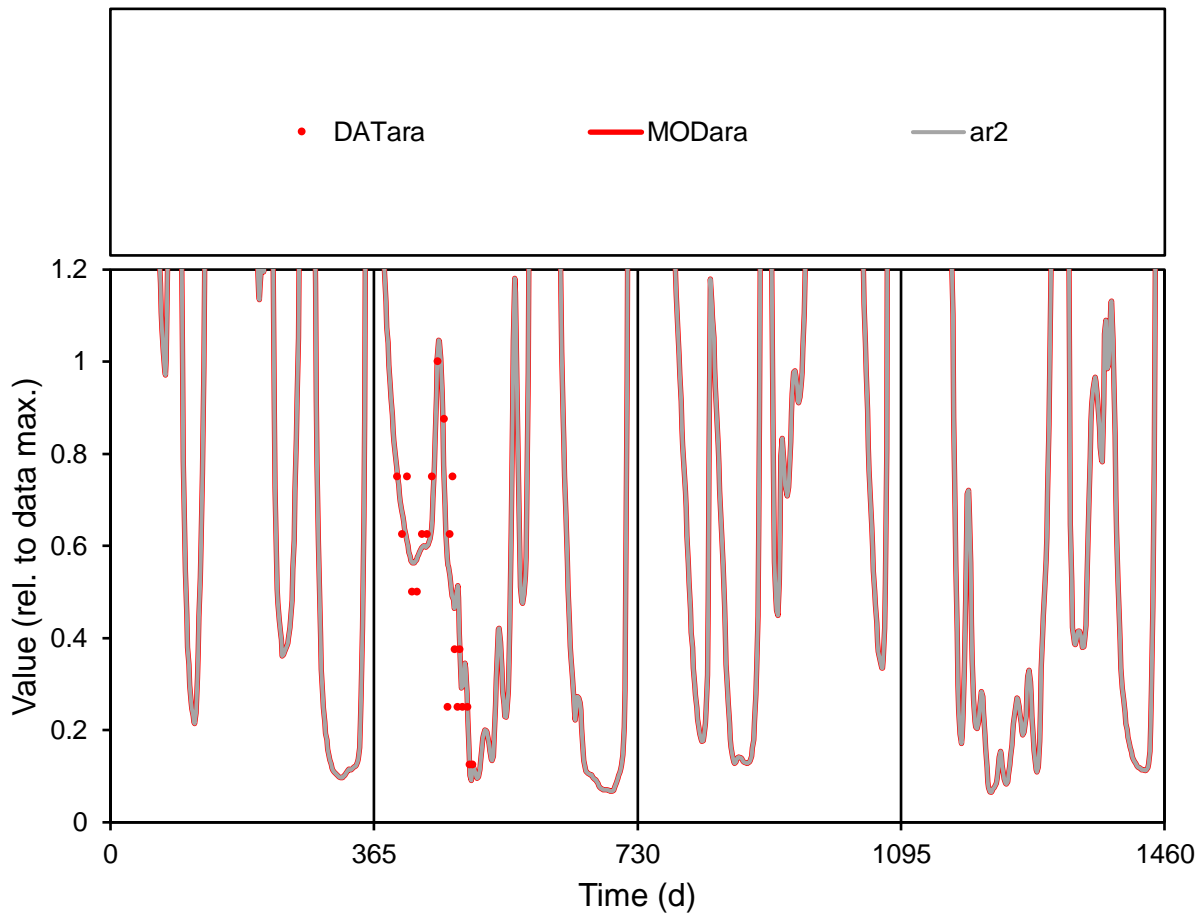

**Figure S1(64). Model - data comparison for observation: ara**

Normalized to max. value of data. Symbols are observations and lines are model. Red line corresponds to observations (e.g. Chlorophyll *a*), others are sub-components (e.g. individual phytoplankton species). See Tables S19 and S24 for observation and model component IDs, and mapping.



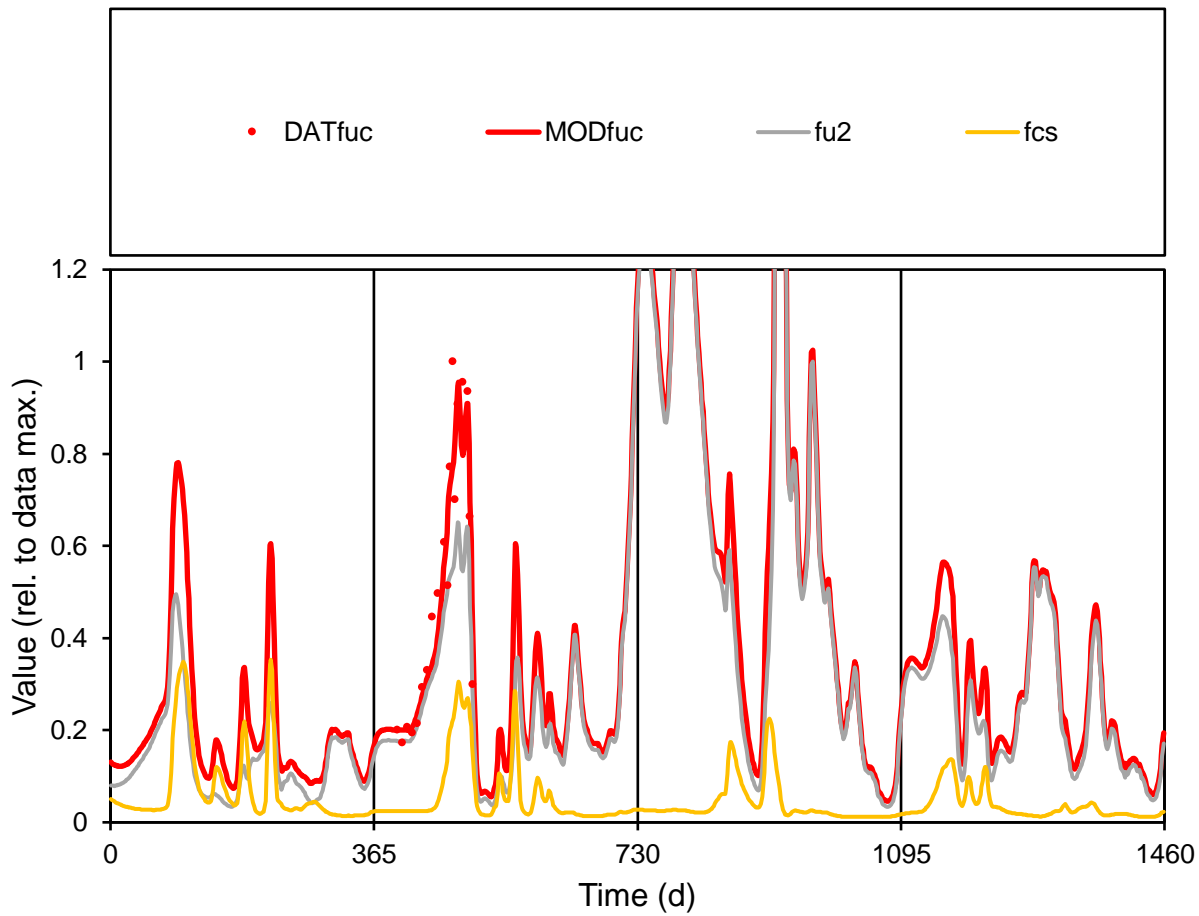

**Figure S1(65). Model - data comparison for observation: fuc**

Normalized to max. value of data. Symbols are observations and lines are model. Red line corresponds to observations (e.g. Chlorophyll *a*), others are sub-components (e.g. individual phytoplankton species). See Tables S19 and S24 for observation and model component IDs, and mapping.

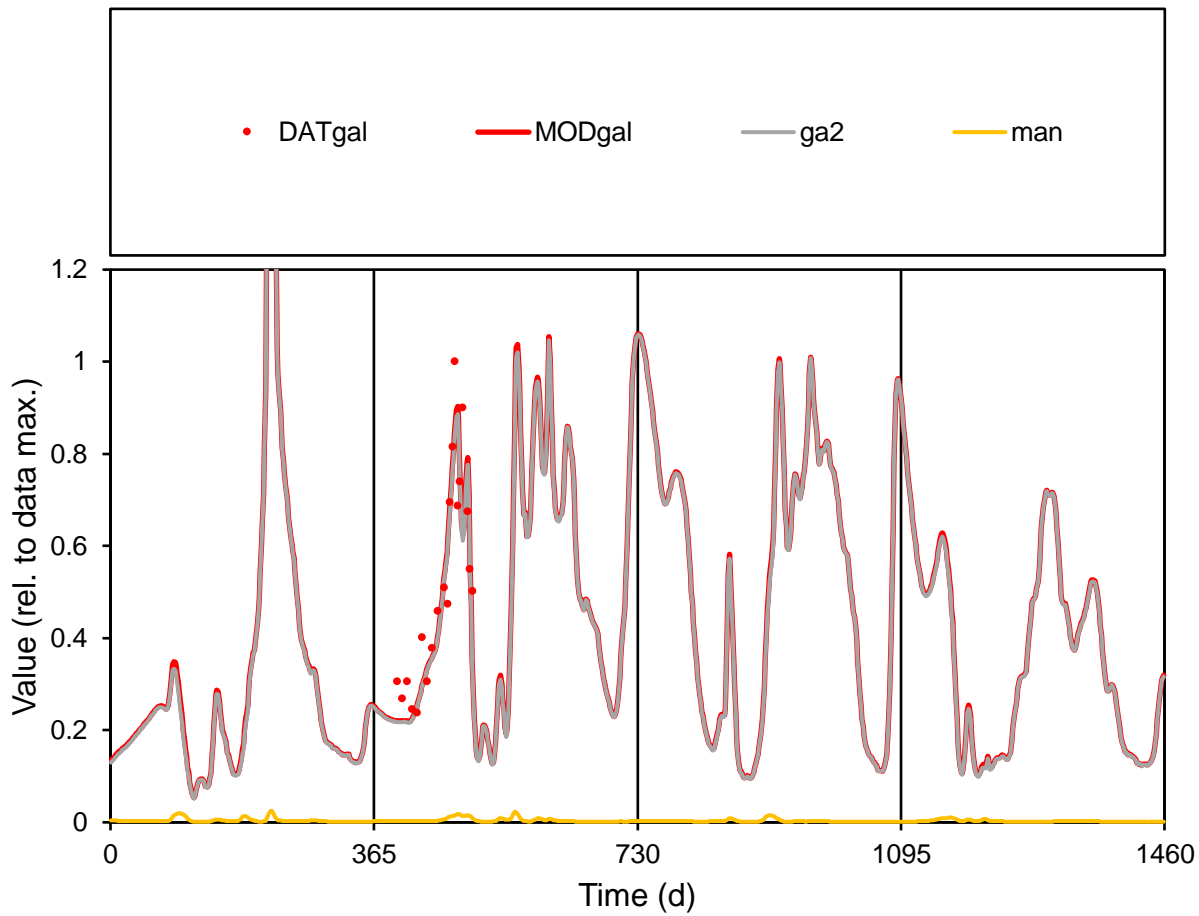

**Figure S1(66). Model - data comparison for observation: gal**

Normalized to max. value of data. Symbols are observations and lines are model. Red line corresponds to observations (e.g. Chlorophyll *a*), others are sub-components (e.g. individual phytoplankton species). See Tables S19 and S24 for observation and model component IDs, and mapping.

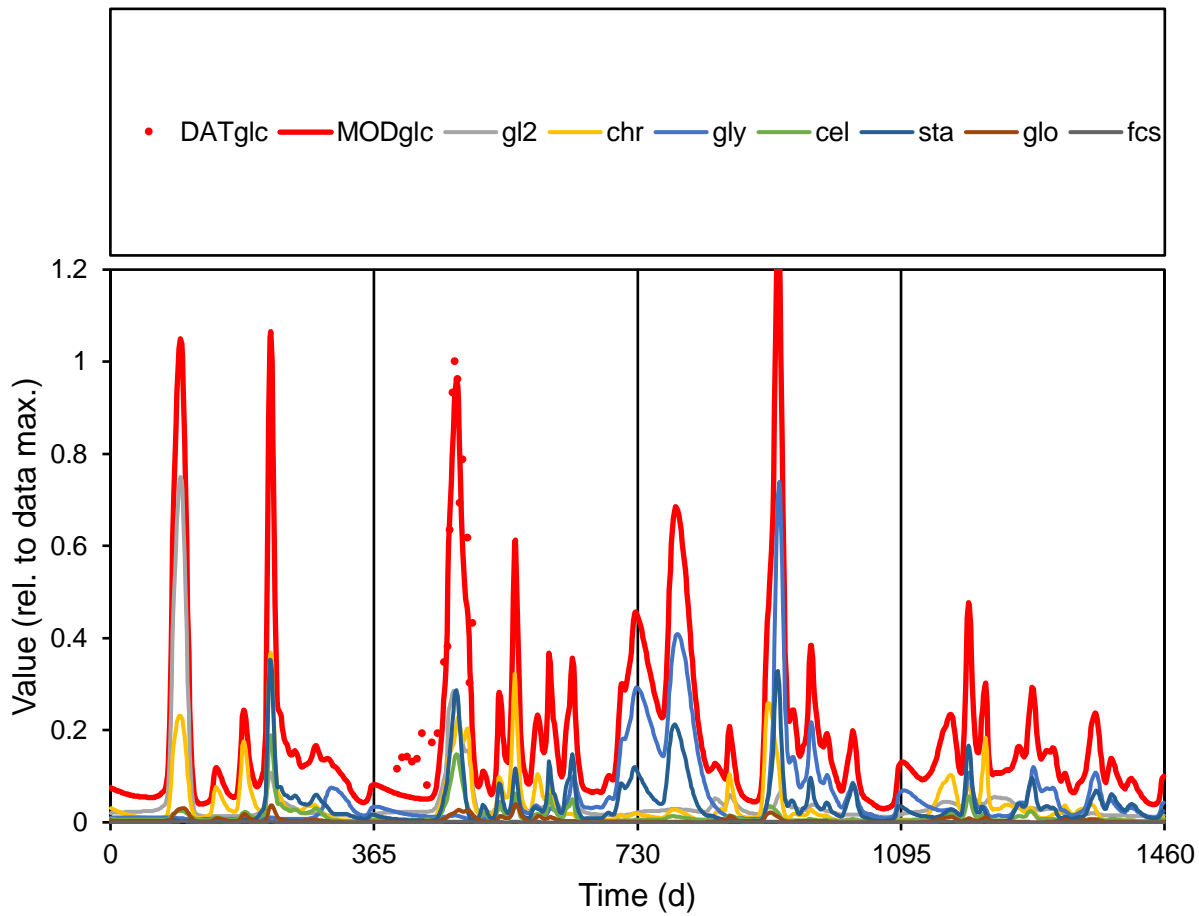

**Figure S1(67). Model - data comparison for observation: glc**

Normalized to max. value of data. Symbols are observations and lines are model. Red line corresponds to observations (e.g. Chlorophyll *a*), others are sub-components (e.g. individual phytoplankton species). See Tables S19 and S24 for observation and model component IDs, and mapping.

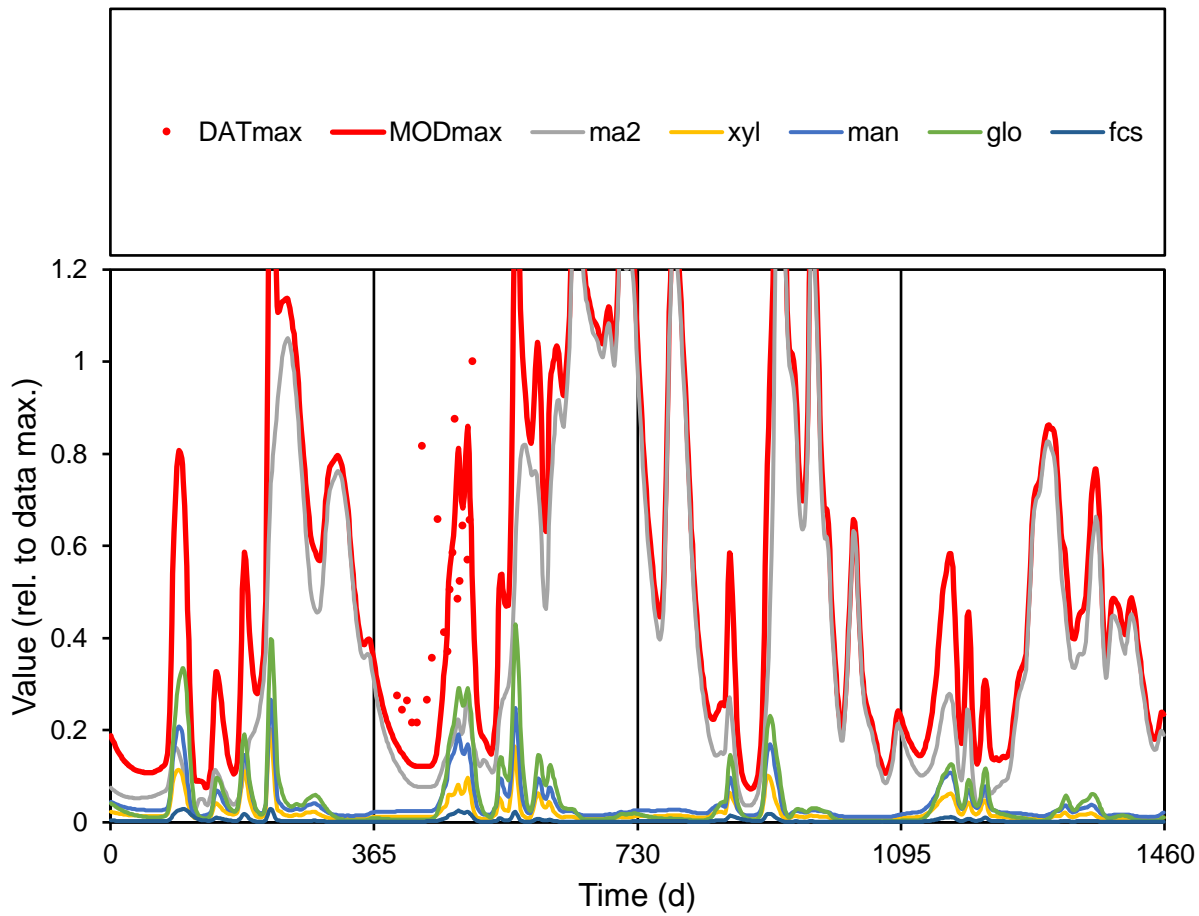

**Figure S1(68). Model - data comparison for observation: max**

Normalized to max. value of data. Symbols are observations and lines are model. Red line corresponds to observations (e.g. Chlorophyll *a*), others are sub-components (e.g. individual phytoplankton species). See Tables S19 and S24 for observation and model component IDs, and mapping.

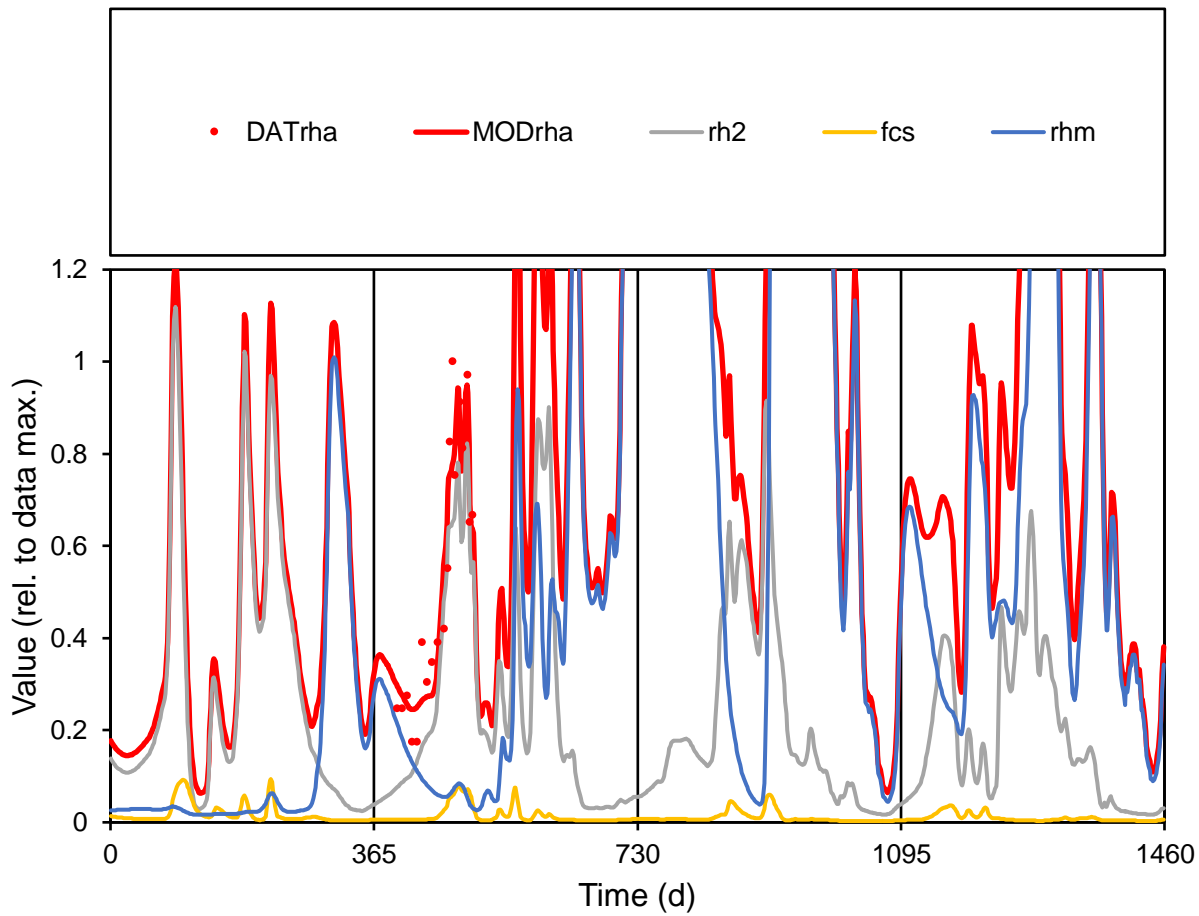

**Figure S1(69). Model - data comparison for observation: rha**

Normalized to max. value of data. Symbols are observations and lines are model. Red line corresponds to observations (e.g. Chlorophyll *a*), others are sub-components (e.g. individual phytoplankton species). See Tables S19 and S24 for observation and model component IDs, and mapping.

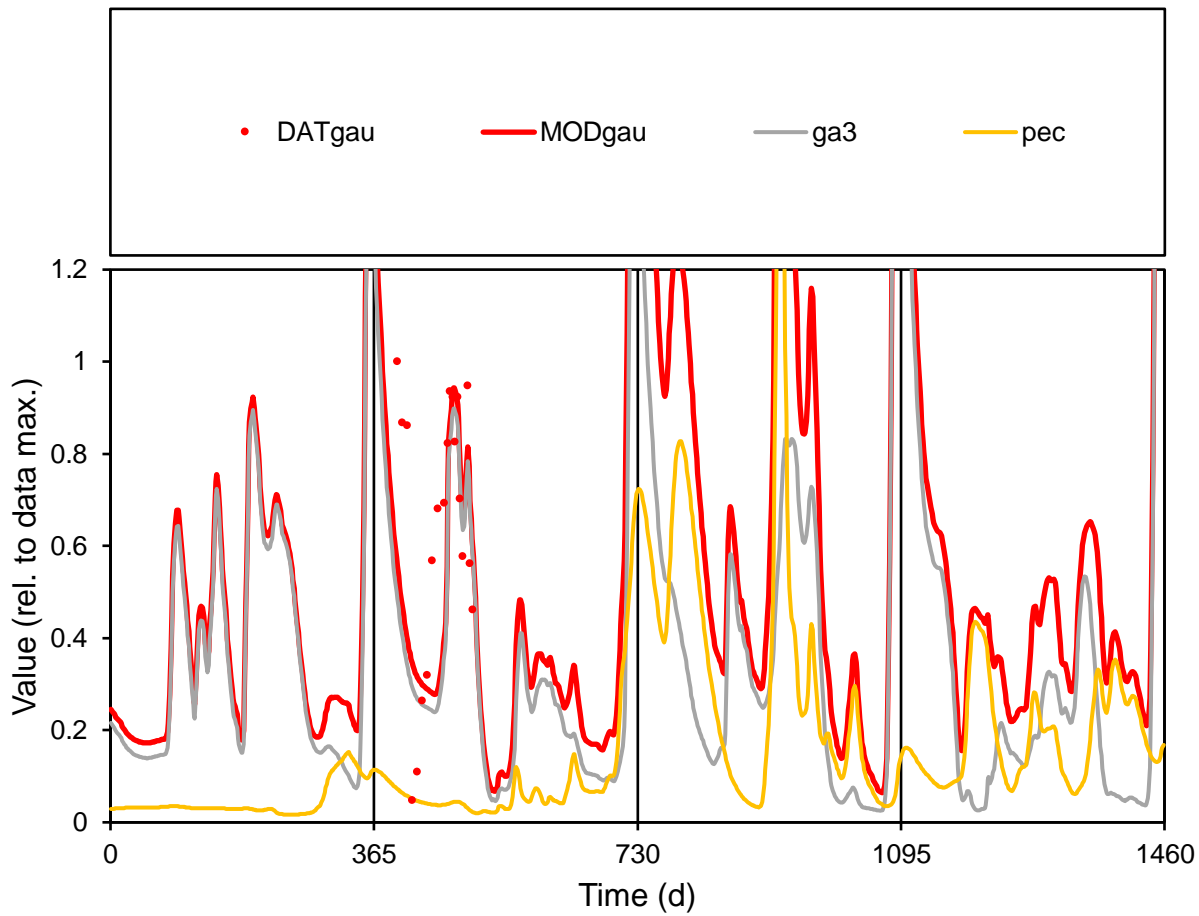

**Figure S1(70). Model - data comparison for observation: gau**

Normalized to max. value of data. Symbols are observations and lines are model. Red line corresponds to observations (e.g. Chlorophyll *a*), others are sub-components (e.g. individual phytoplankton species). See Tables S19 and S24 for observation and model component IDs, and mapping.

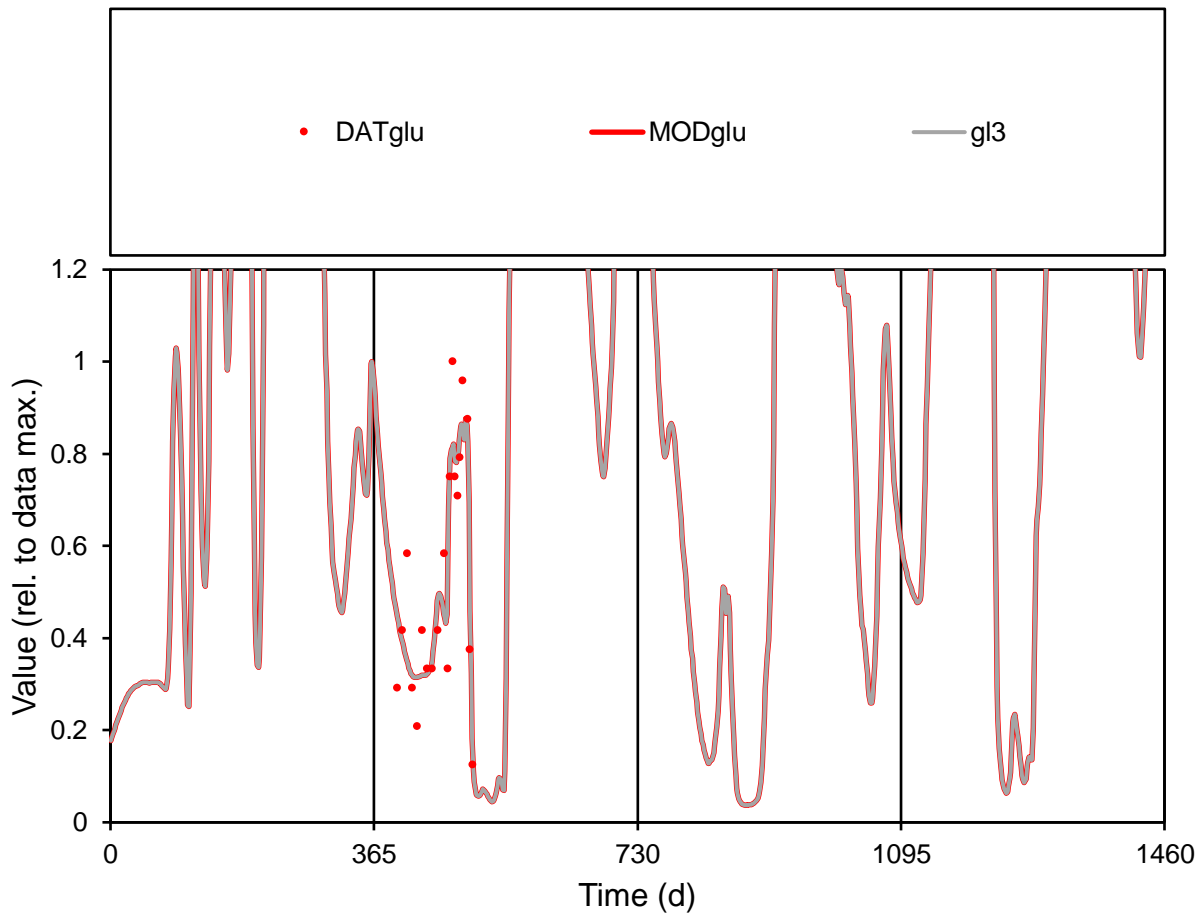

**Figure S1(71). Model - data comparison for observation: glu**

Normalized to max. value of data. Symbols are observations and lines are model. Red line corresponds to observations (e.g. Chlorophyll *a*), others are sub-components (e.g. individual phytoplankton species). See Tables S19 and S24 for observation and model component IDs, and mapping.

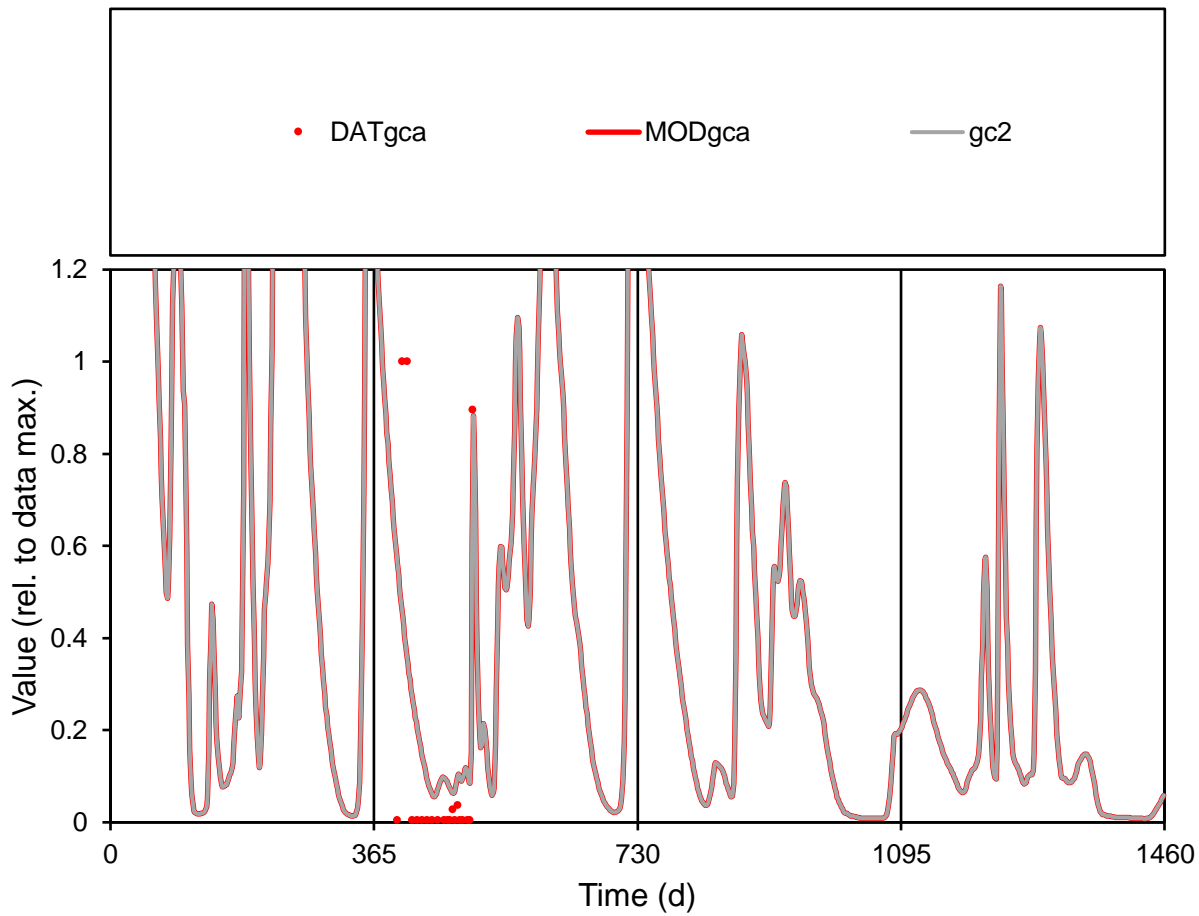

**Figure S1(72). Model - data comparison for observation: gca**

Normalized to max. value of data. Symbols are observations and lines are model. Red line corresponds to observations (e.g. Chlorophyll *a*), others are sub-components (e.g. individual phytoplankton species). See Tables S19 and S24 for observation and model component IDs, and mapping.



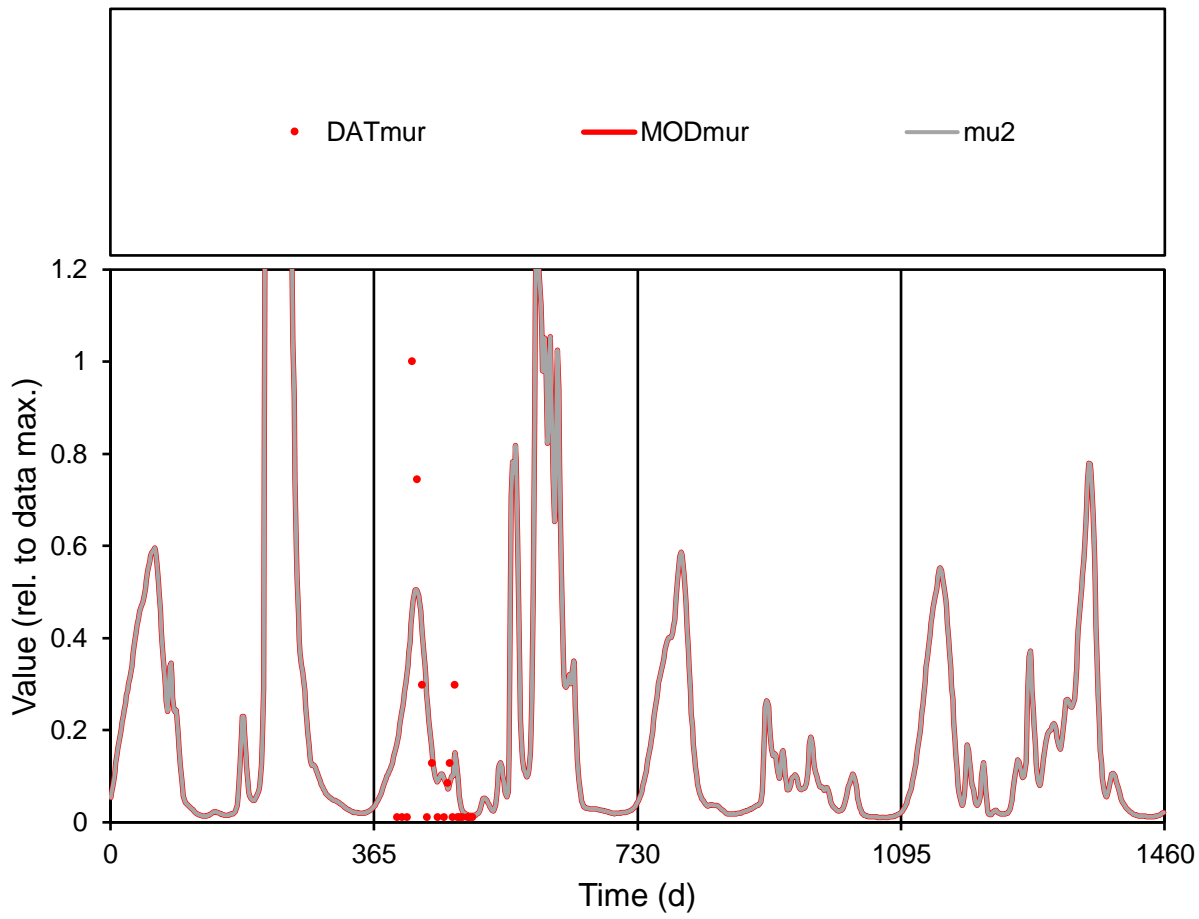

**Figure S1(73). Model - data comparison for observation: mur**

Normalized to max. value of data. Symbols are observations and lines are model. Red line corresponds to observations (e.g. Chlorophyll *a*), others are sub-components (e.g. individual phytoplankton species). See Tables S19 and S24 for observation and model component IDs, and mapping.

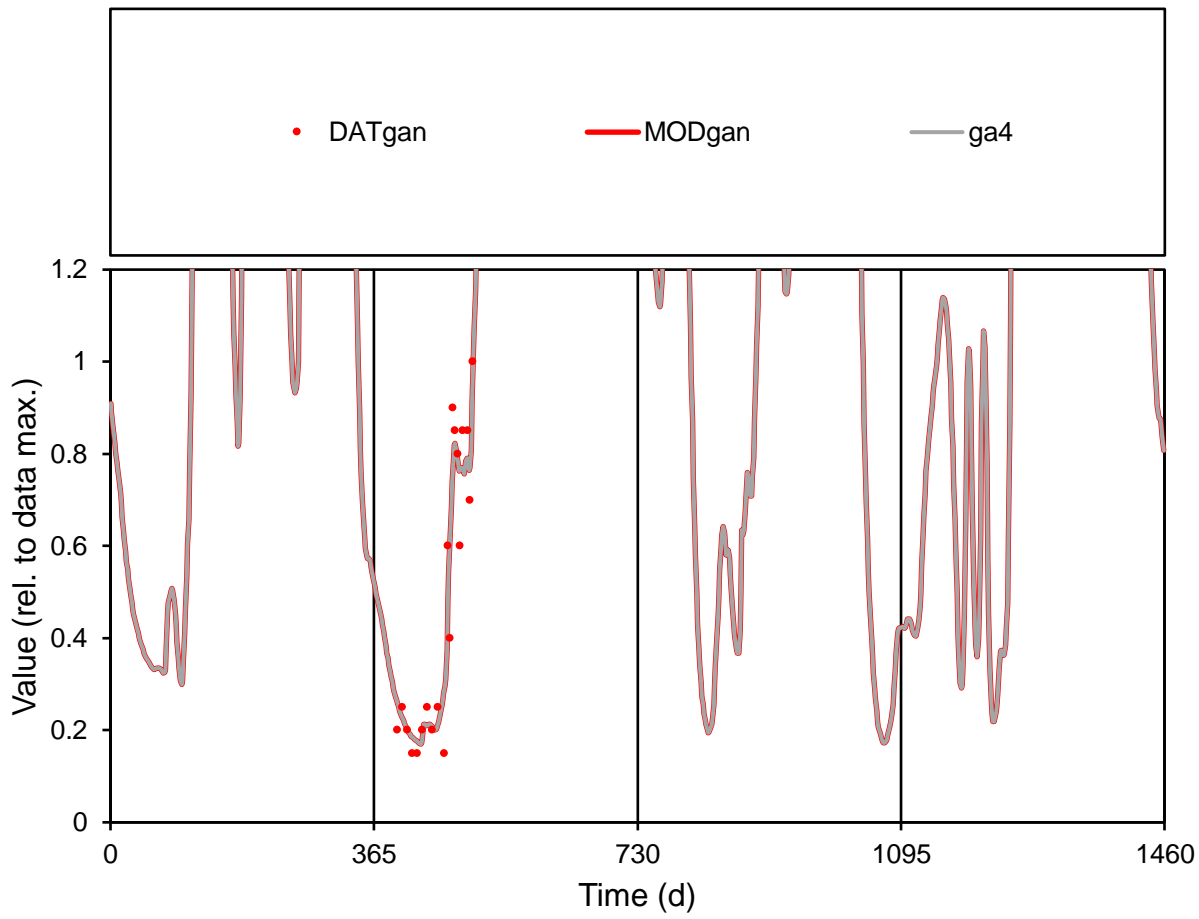

**Figure S1(74). Model - data comparison for observation: gan**

Normalized to max. value of data. Symbols are observations and lines are model. Red line corresponds to observations (e.g. Chlorophyll *a*), others are sub-components (e.g. individual phytoplankton species). See Tables S19 and S24 for observation and model component IDs, and mapping.

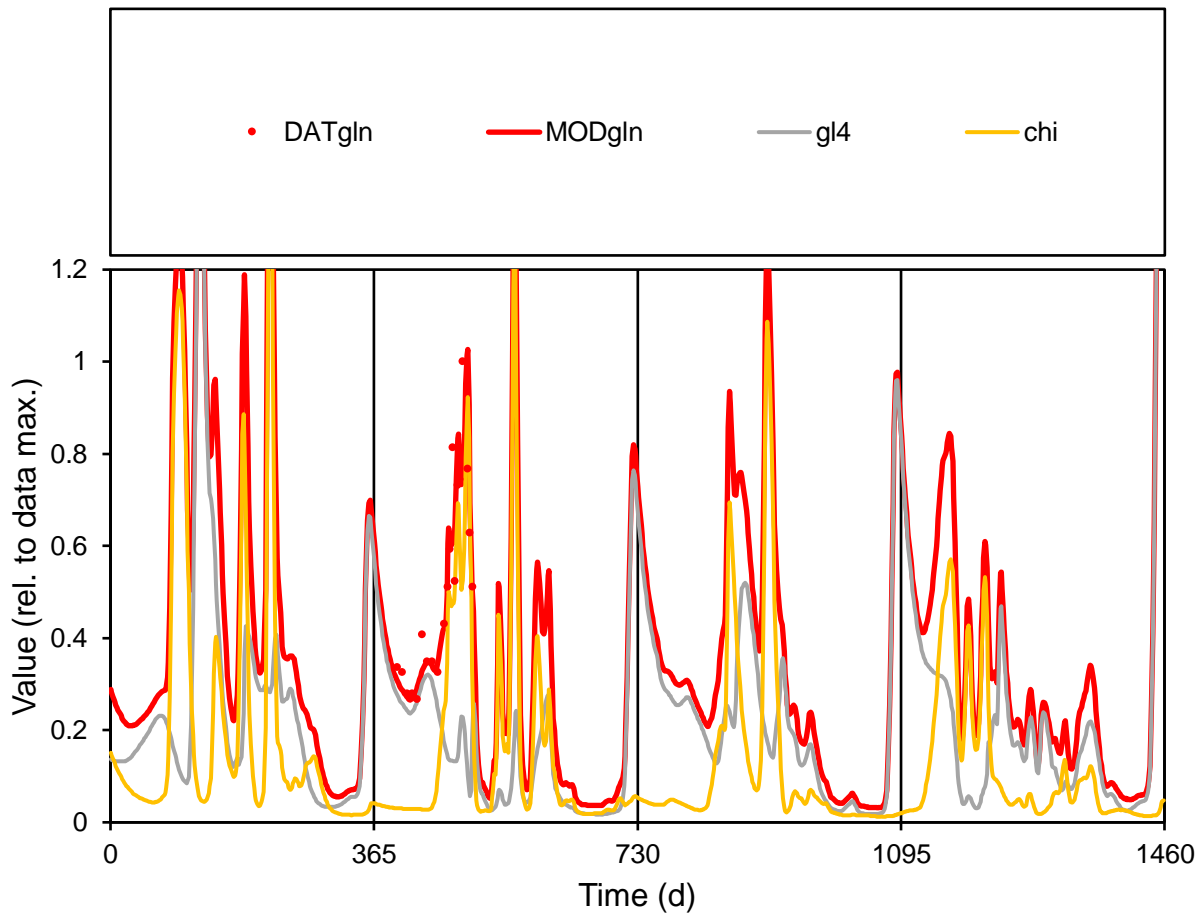

**Figure S1(75). Model - data comparison for observation: gln**

Normalized to max. value of data. Symbols are observations and lines are model. Red line corresponds to observations (e.g. Chlorophyll *a*), others are sub-components (e.g. individual phytoplankton species). See Tables S19 and S24 for observation and model component IDs, and mapping.
